# Supplementary material for: Enhancement of Photocatalytic Activity and Microstructural Growth of Cobalt-Substituted Ba1−xCoxTiO3 {x = 0, …, 1} Heterostructure
Source: MDPI journal article supplement (doi:10.3390/chemengineering7030043), 2023-05-01
Supplement: s1 [file s1]

# Enhancement of Photocatalytic Activity and Microstructural Growth of Cobalt-Substituted $\text{Ba}_{1-x}\text{Co}_x\text{TiO}_3$ $\{x = 0, \dots, 1\}$ Heterostructure

By Sana Jebali, Mahdi Meftah, Chadha Mejri, Abdesslem Ben Haj Amara and Walid Oueslati \*

LR19ES20: Resources, Materials and Ecosystems (RME), Faculty of Sciences of Bizerte, University of Carthage, Bizerte 7021, Tunisia

\*\*\*\*\*supplementary materials \*\*\*\*\*

## 1. Experimental Process

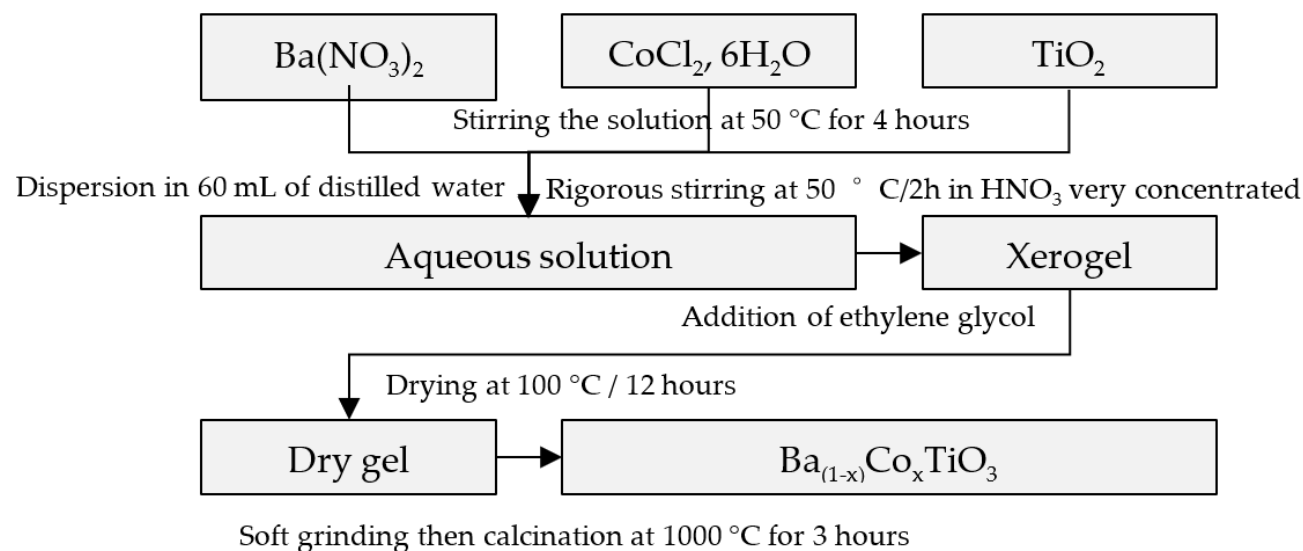

**Figure S1.** Flow chart of the sol-gel processing of  $(x = \{0, \dots, 1\})$  powder ceramics.

## 2. Materials and Methods: Photocatalytic Application

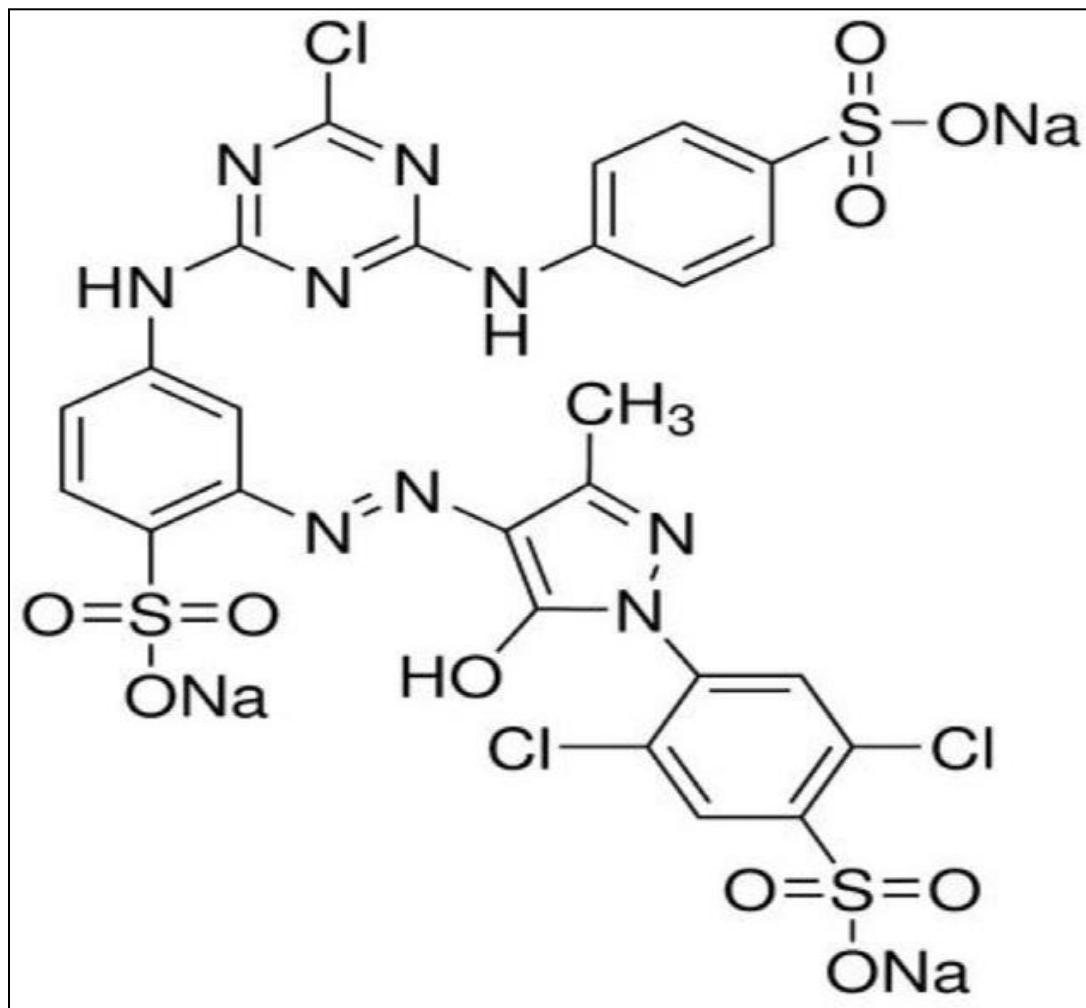

**Figure S2.** Characteristics and chemical formula of Cibacron Brilliant Yellow 3G-P (Y).

### 3. Qualitative PXRD analysis

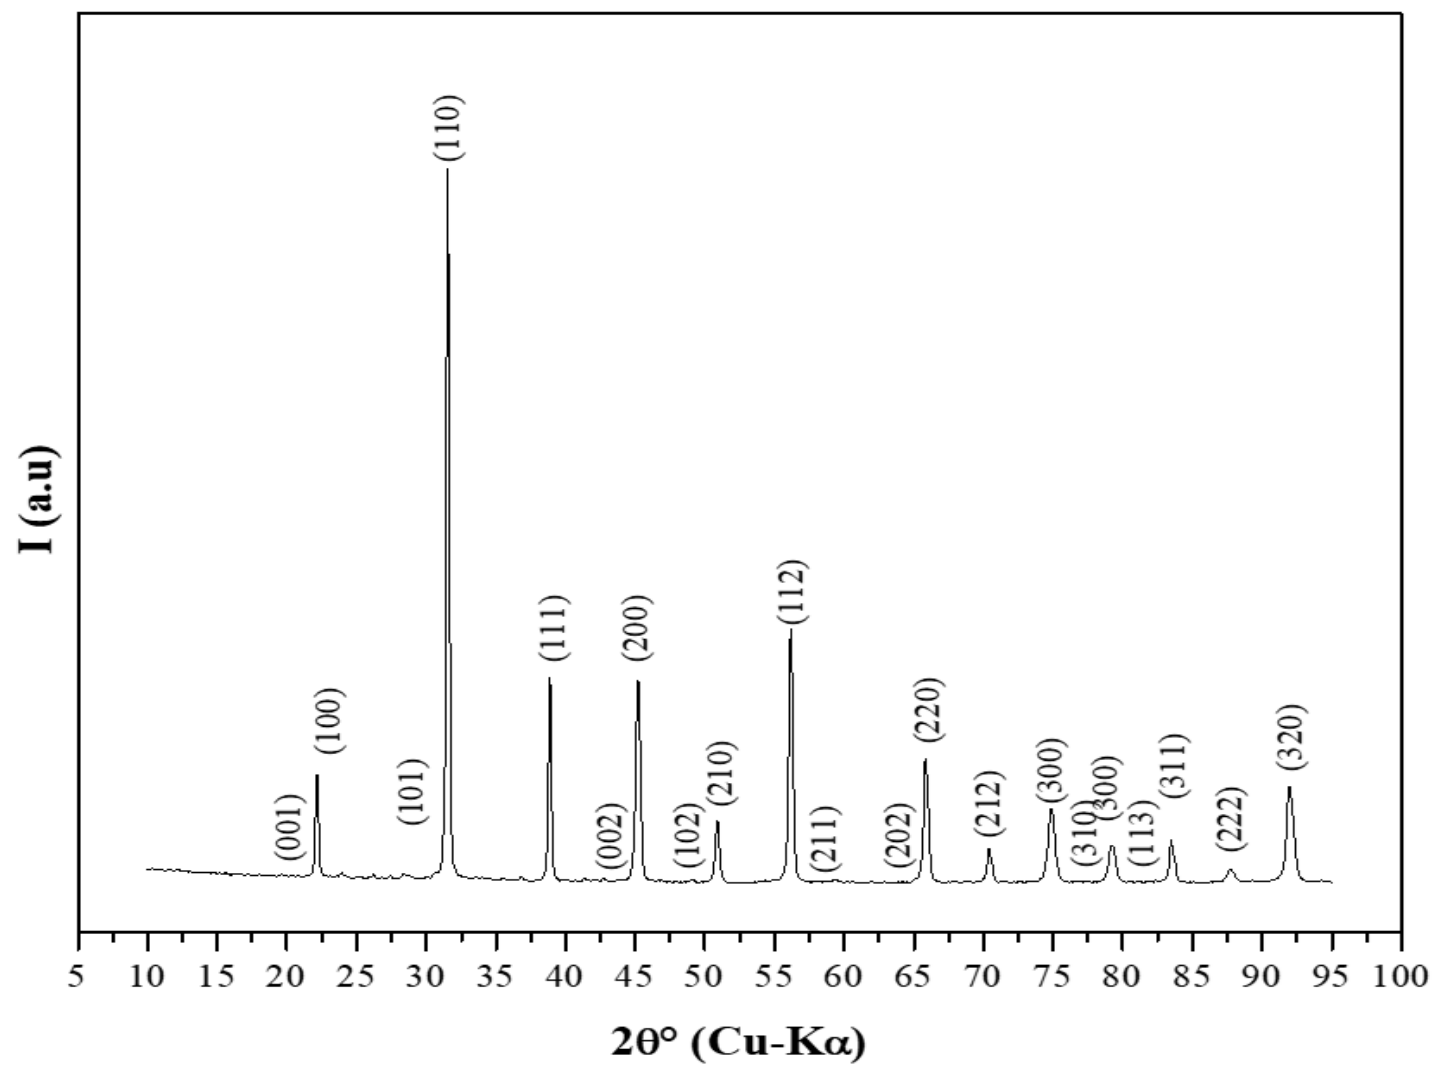

**Figure S3.** Powder x-ray diffraction pattern of synthesized pure BT nanoparticles heated at 1000 °C.

# Quantitative PXRD analysis

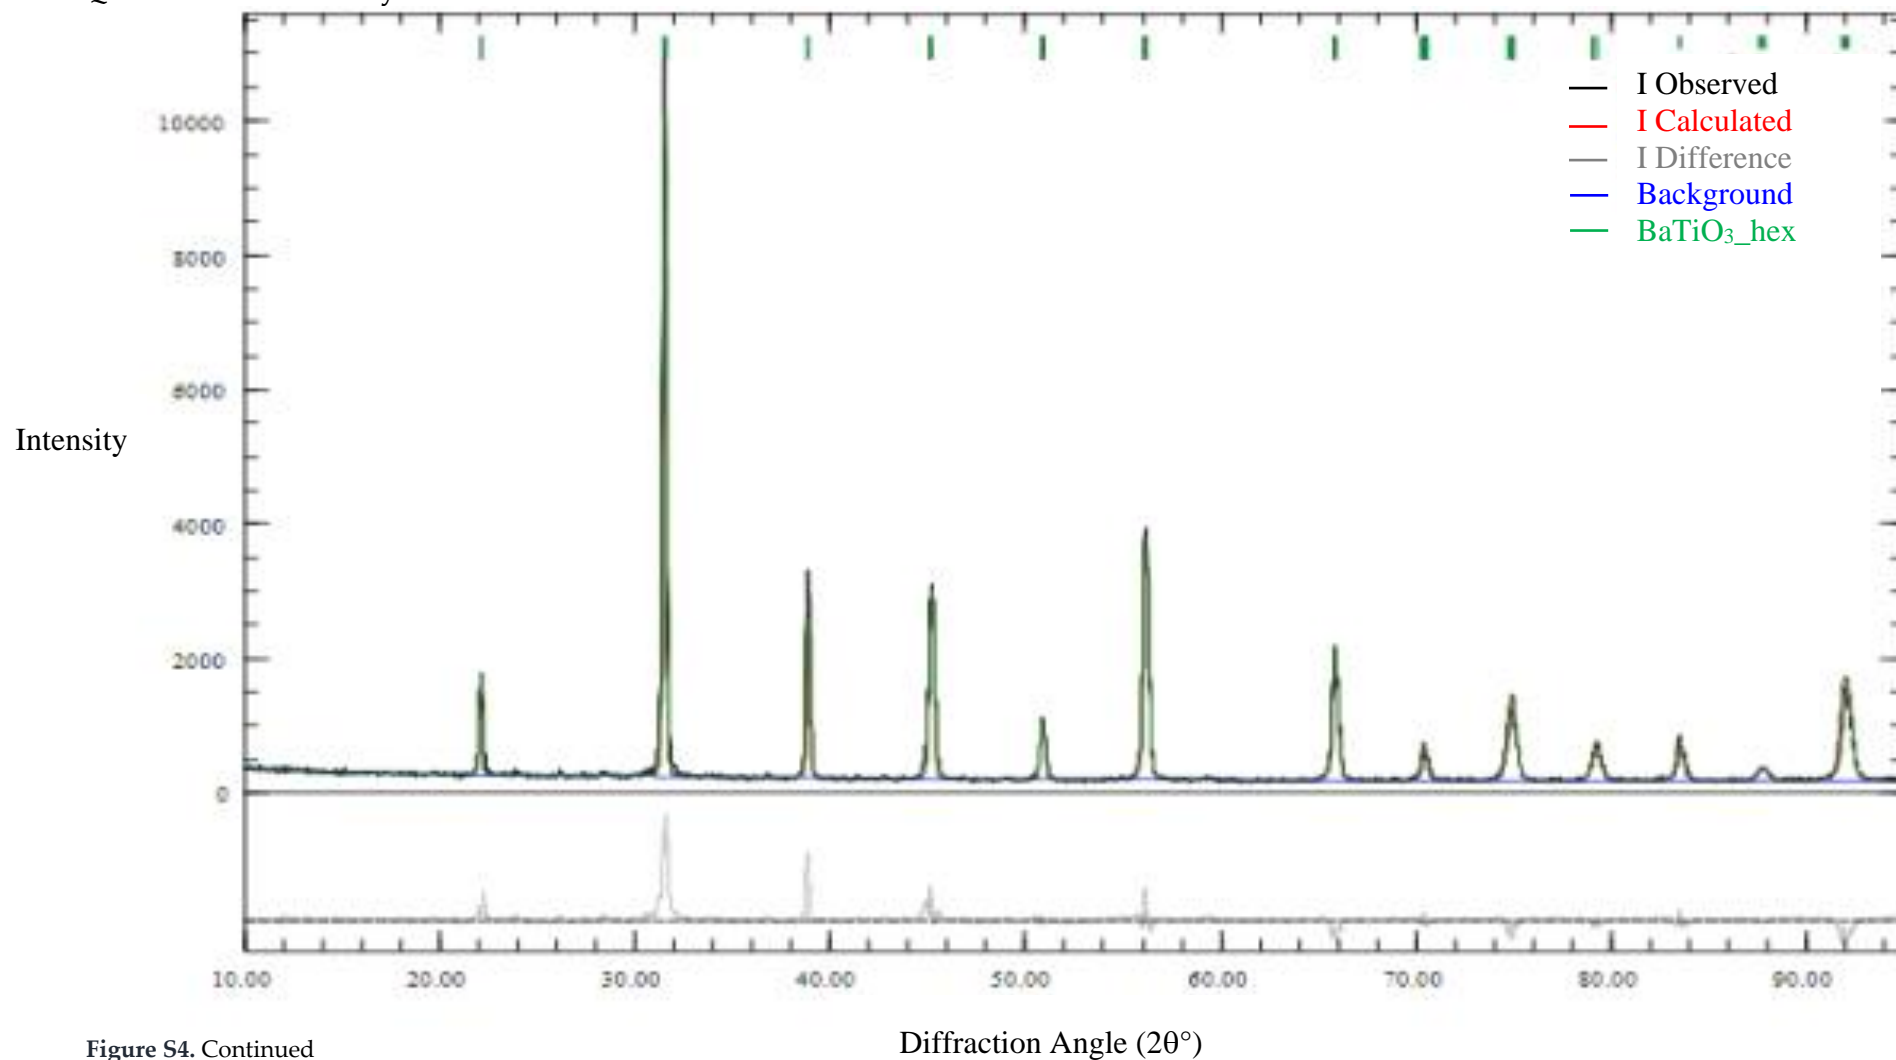

Figure S4. Continued

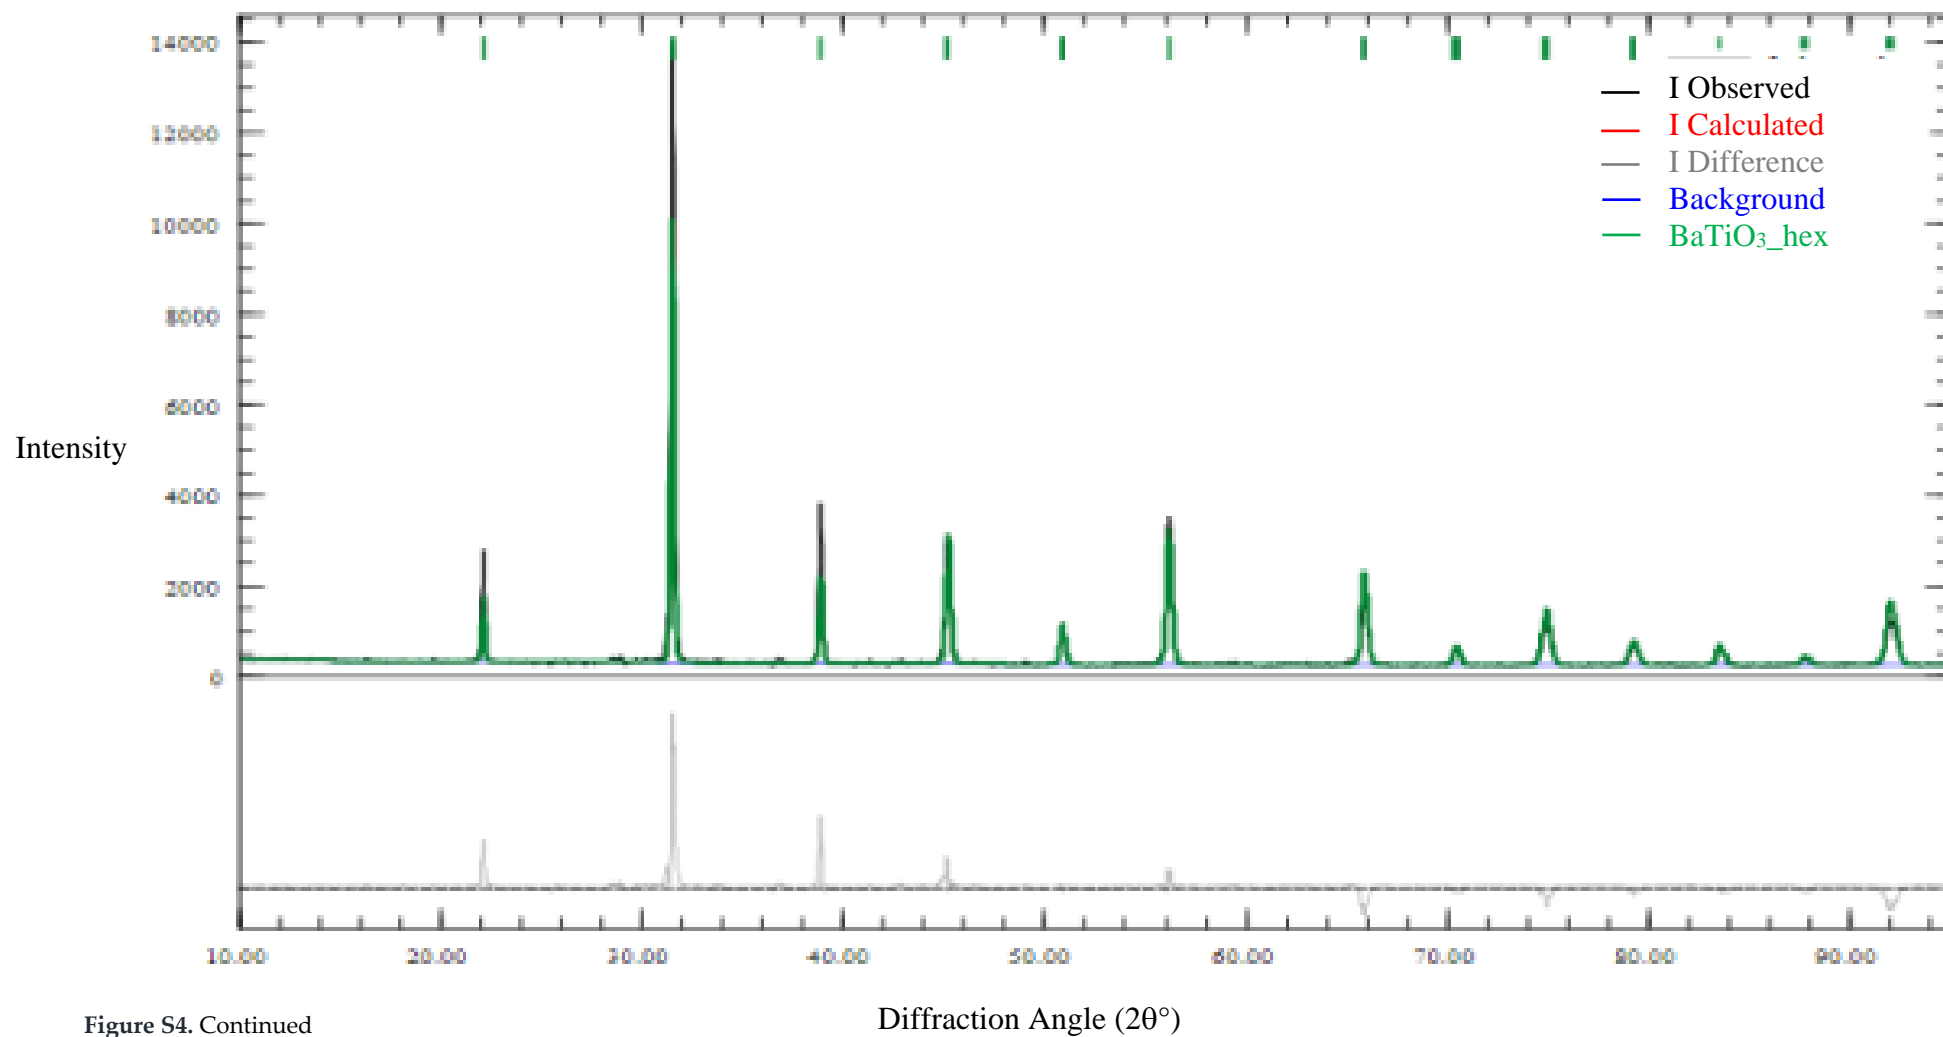

Figure S4. Continued

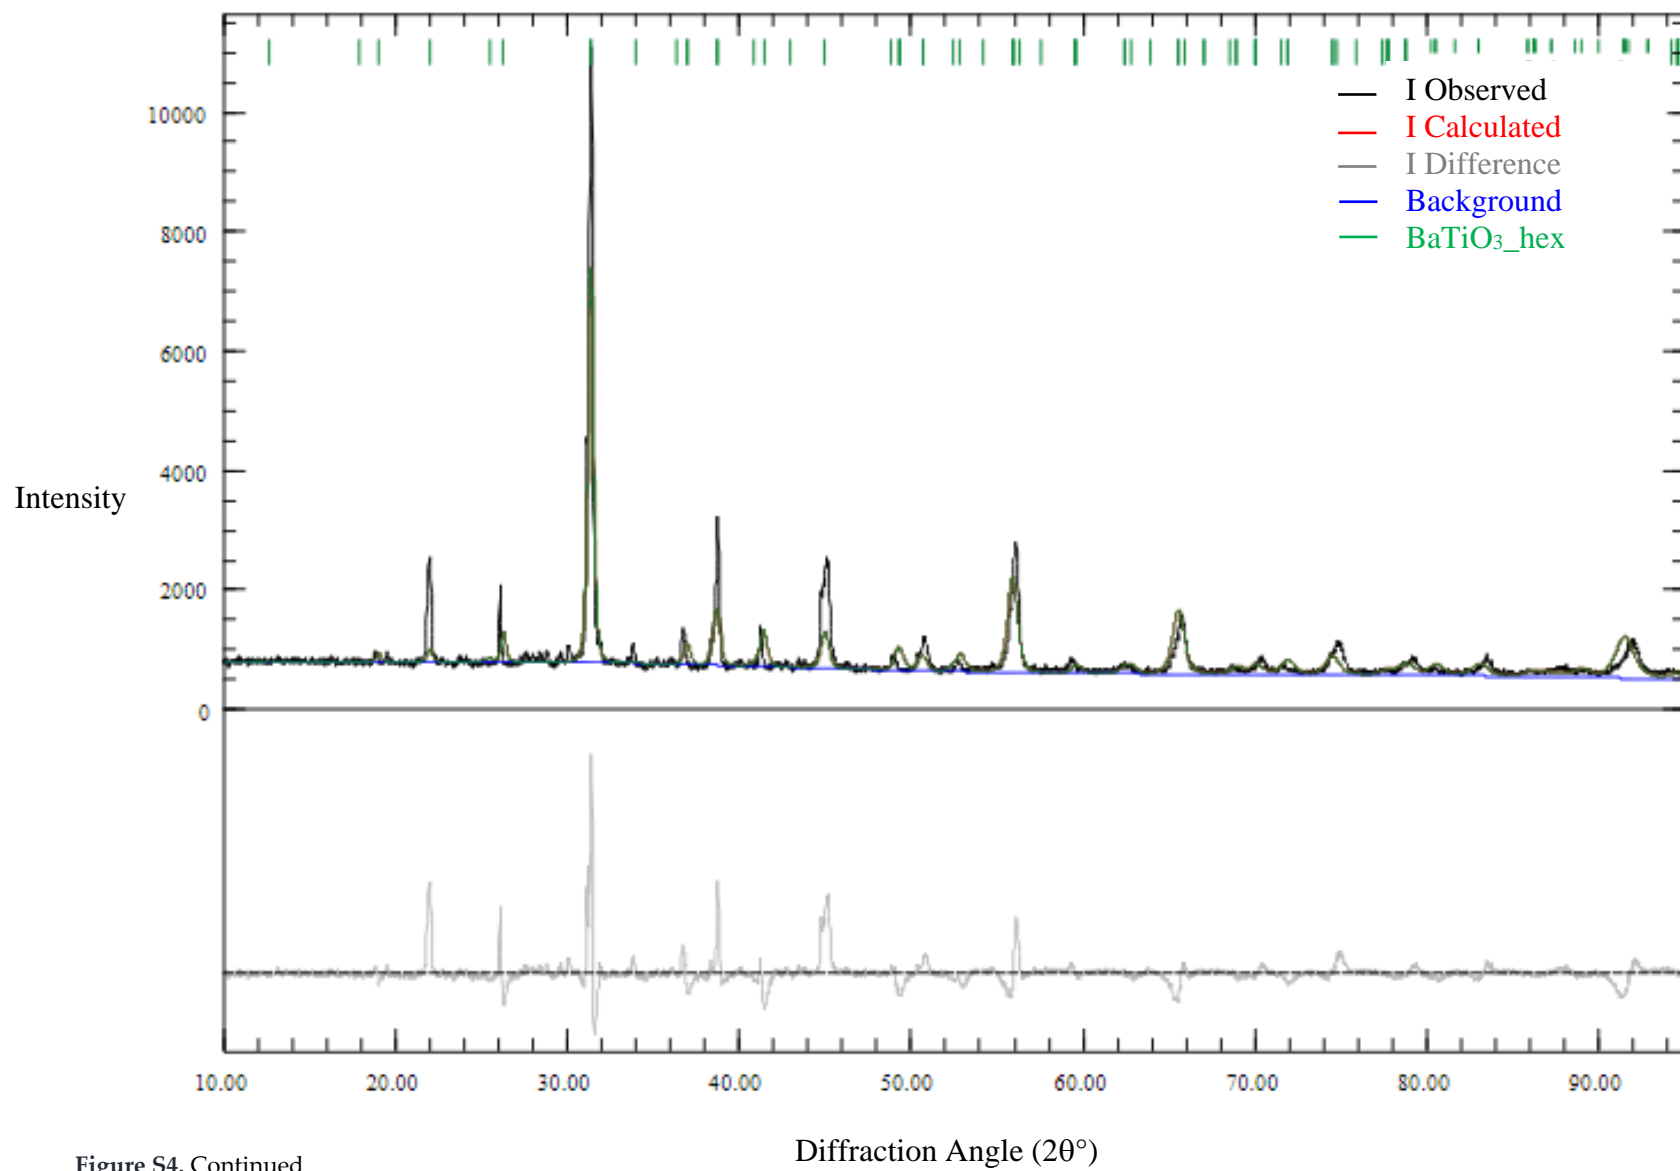

Figure S4. Continued

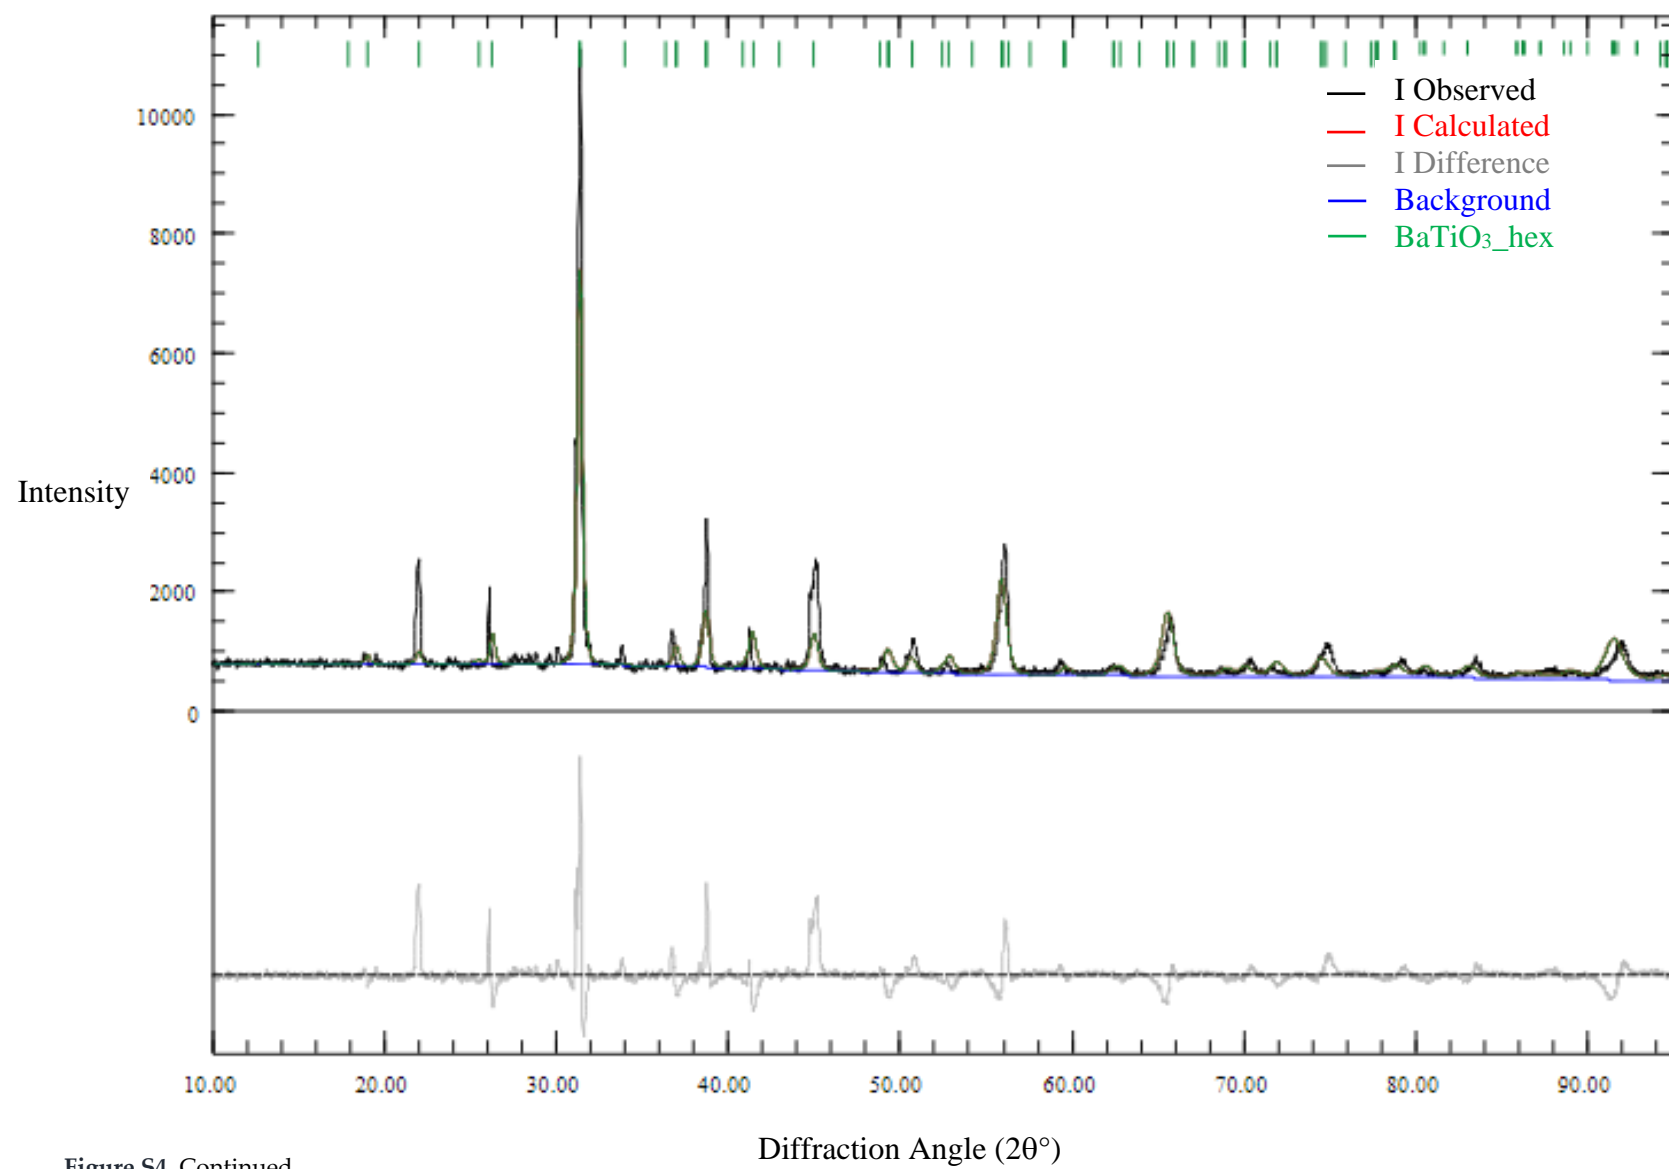

Figure S4. Continued

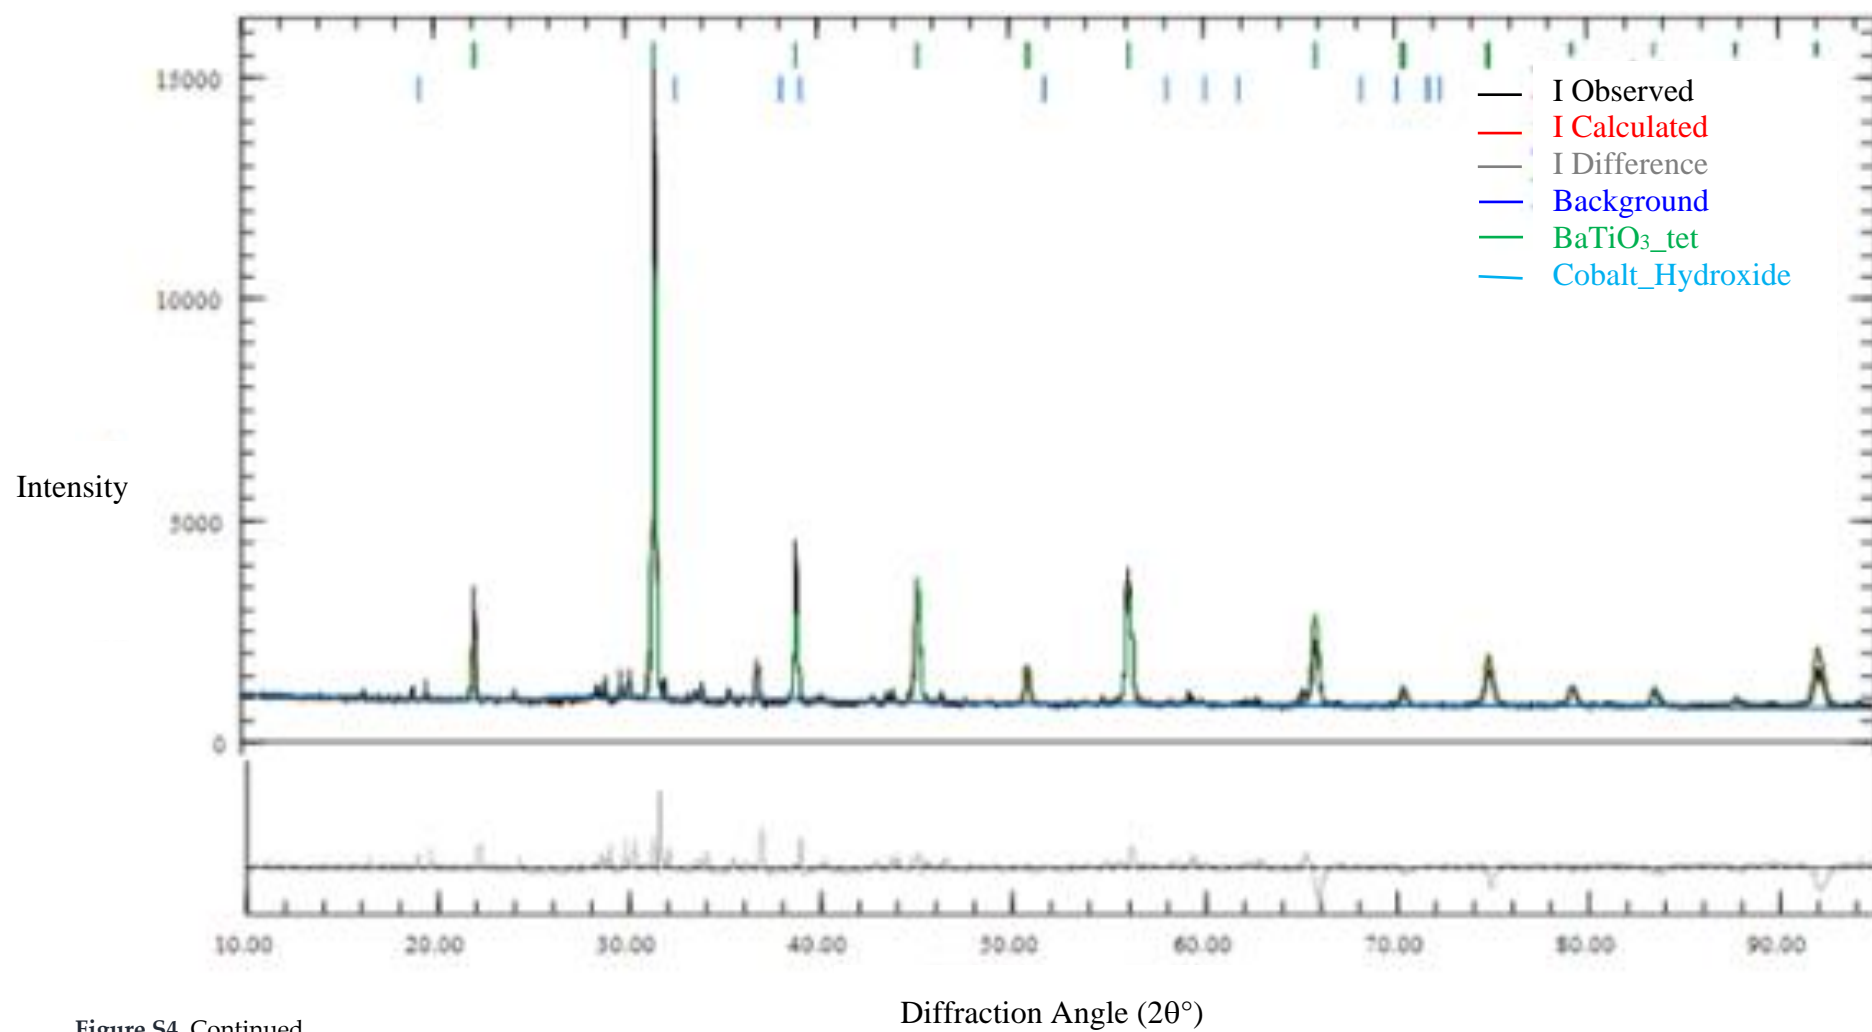

Figure S4. Continued



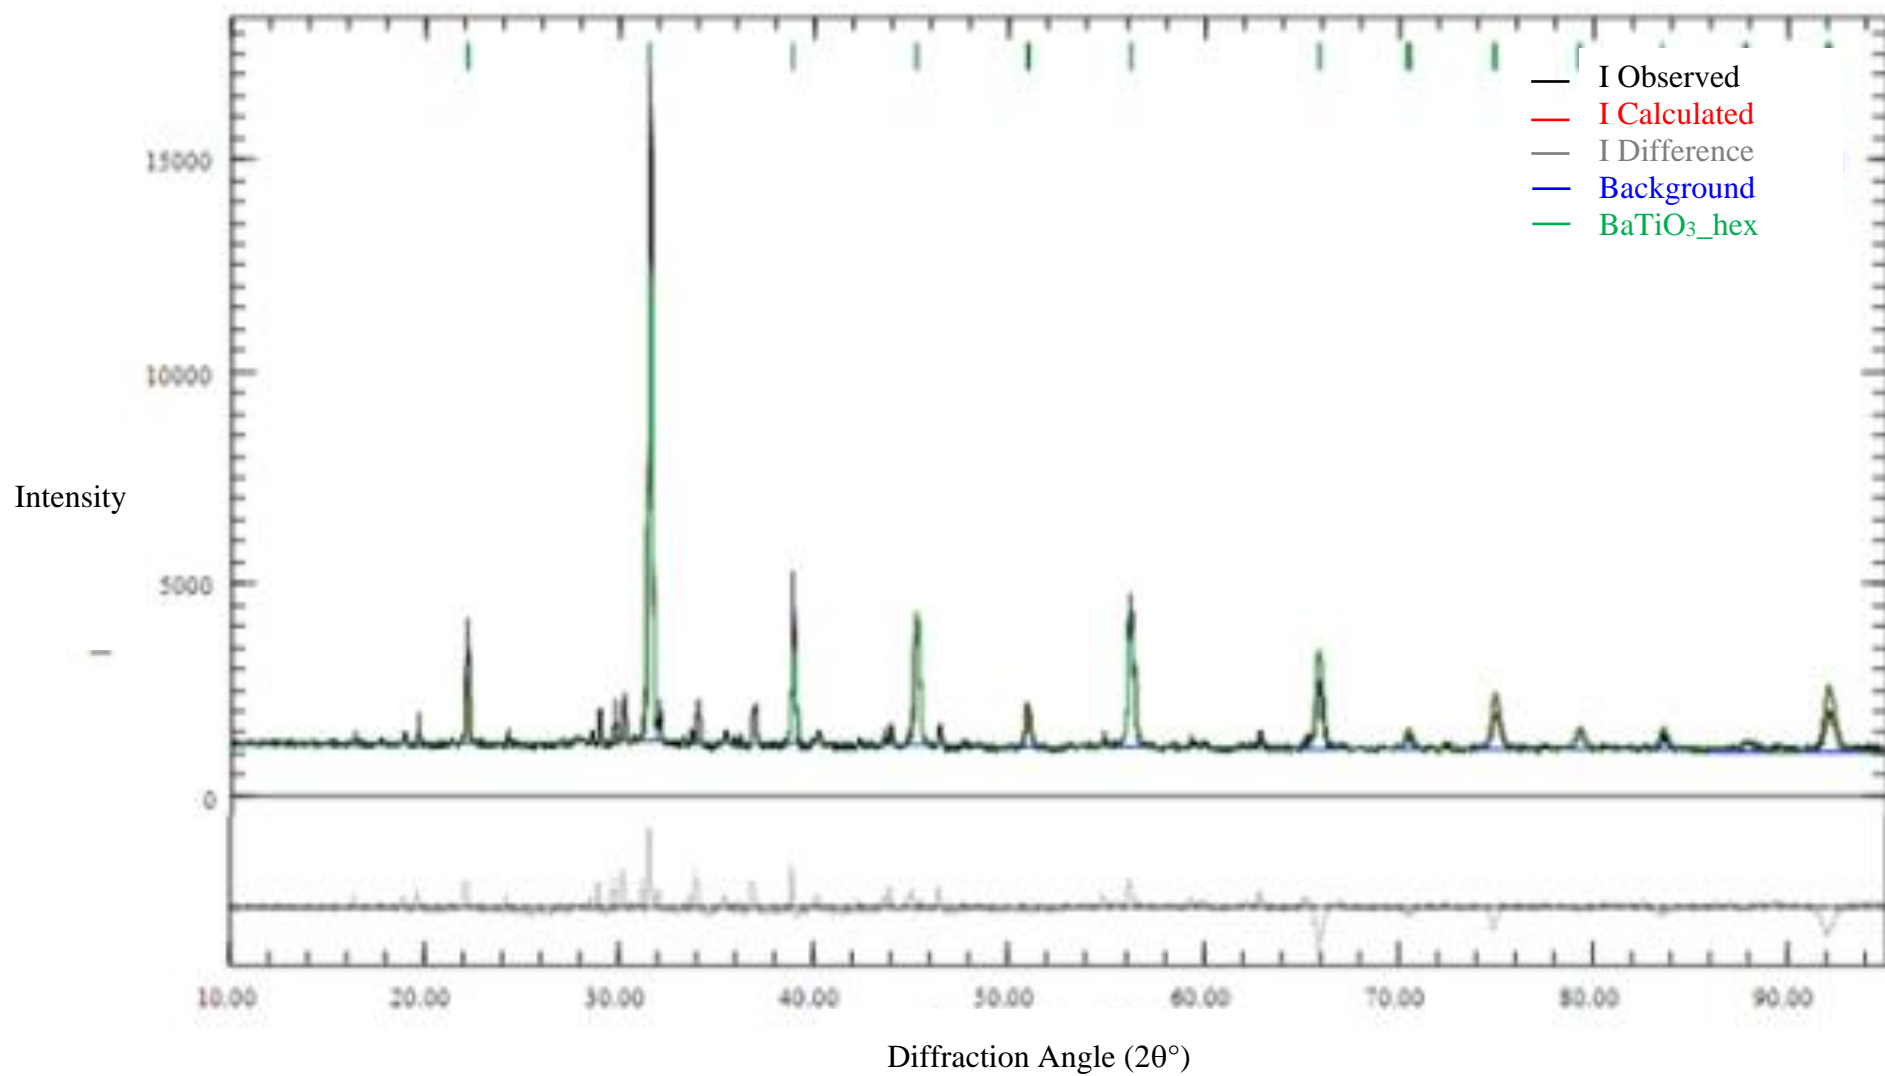

Figure S4. Continued

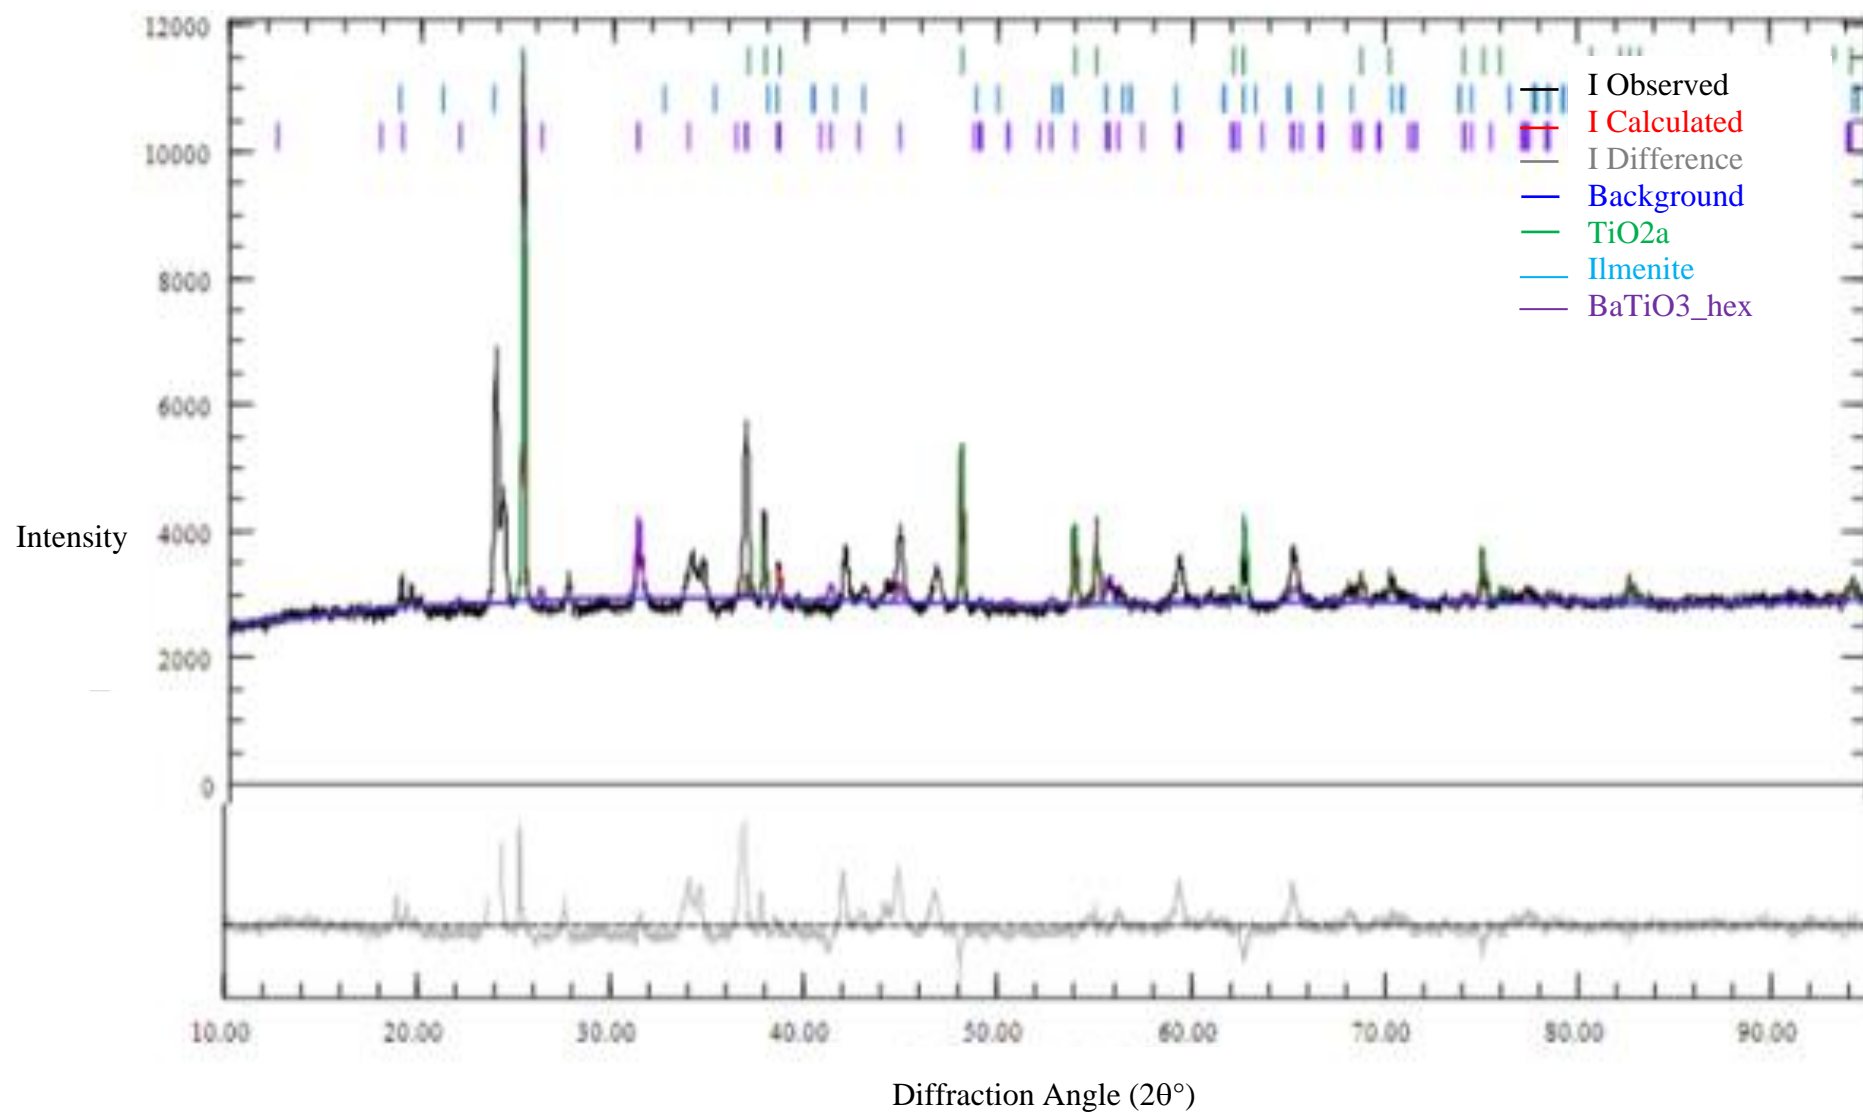

Figure S4. Continued

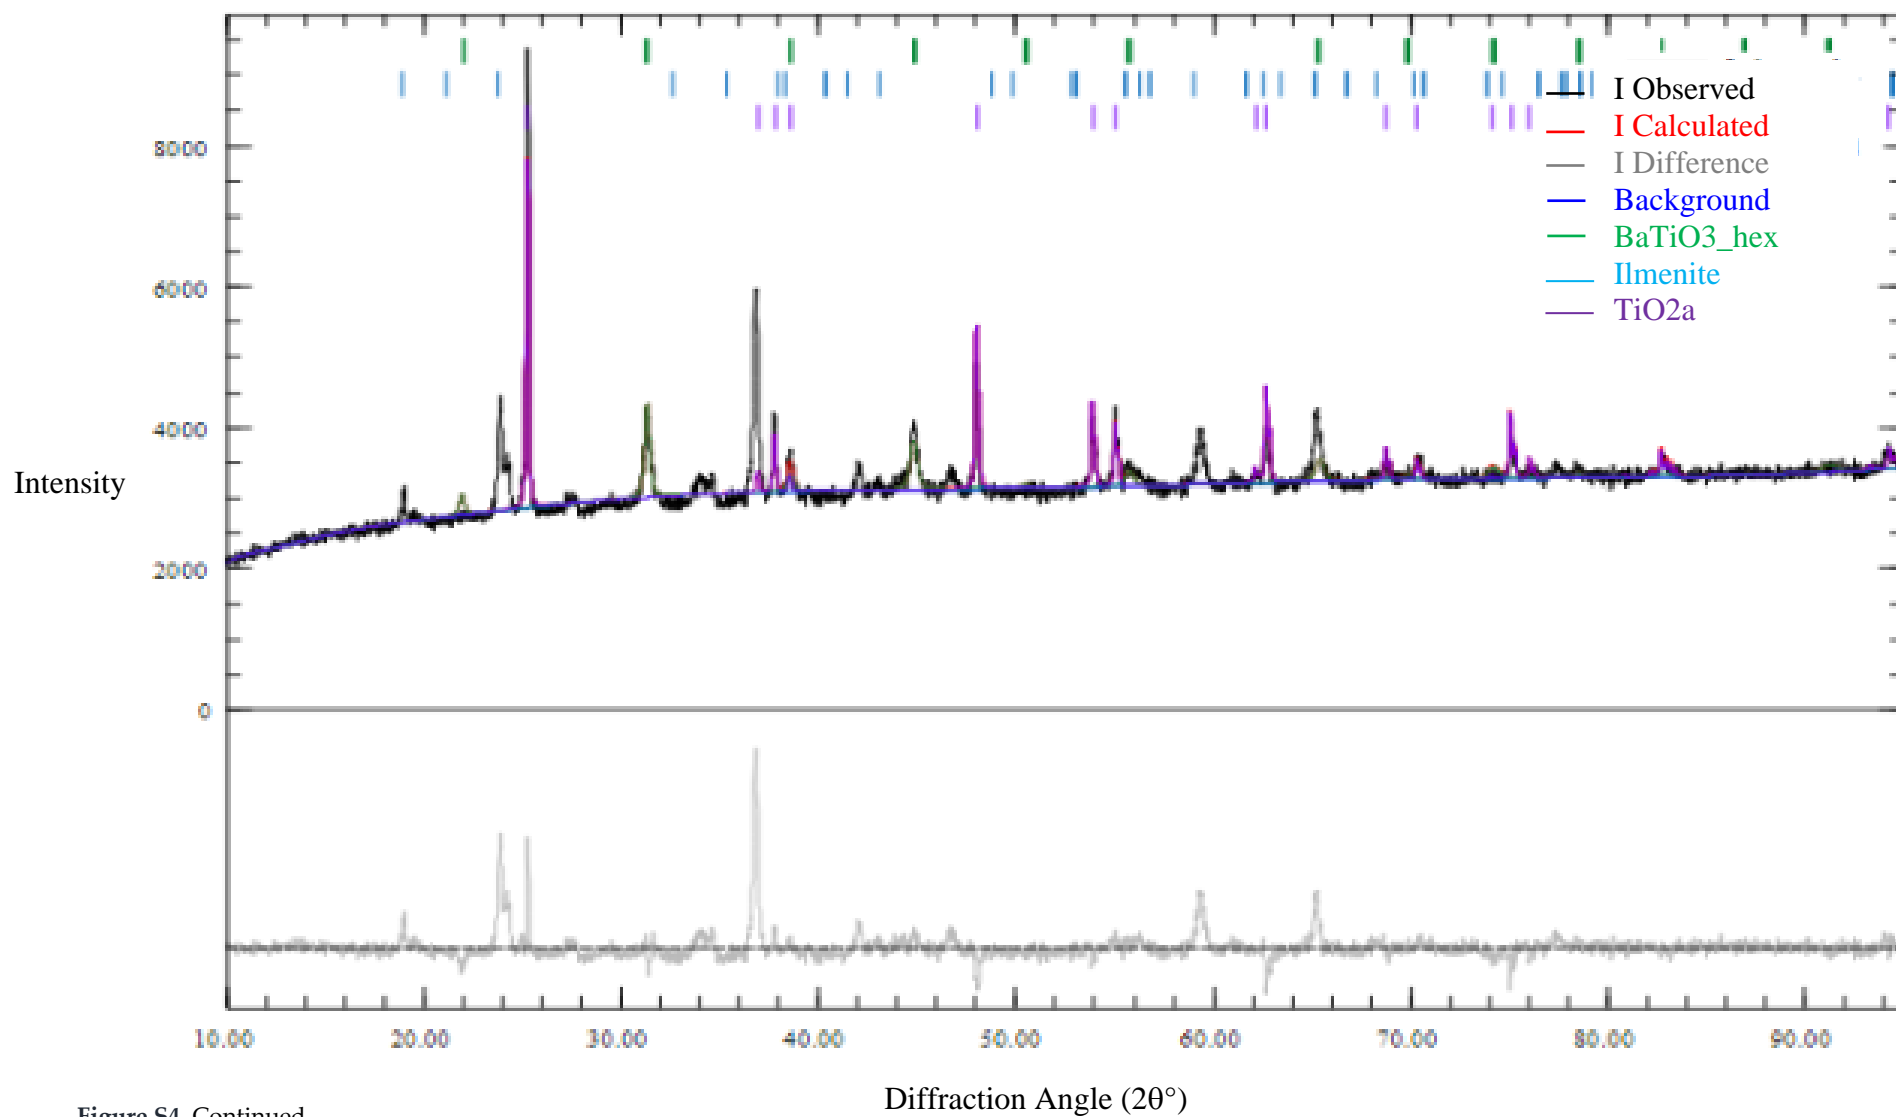

Figure S4. Continued

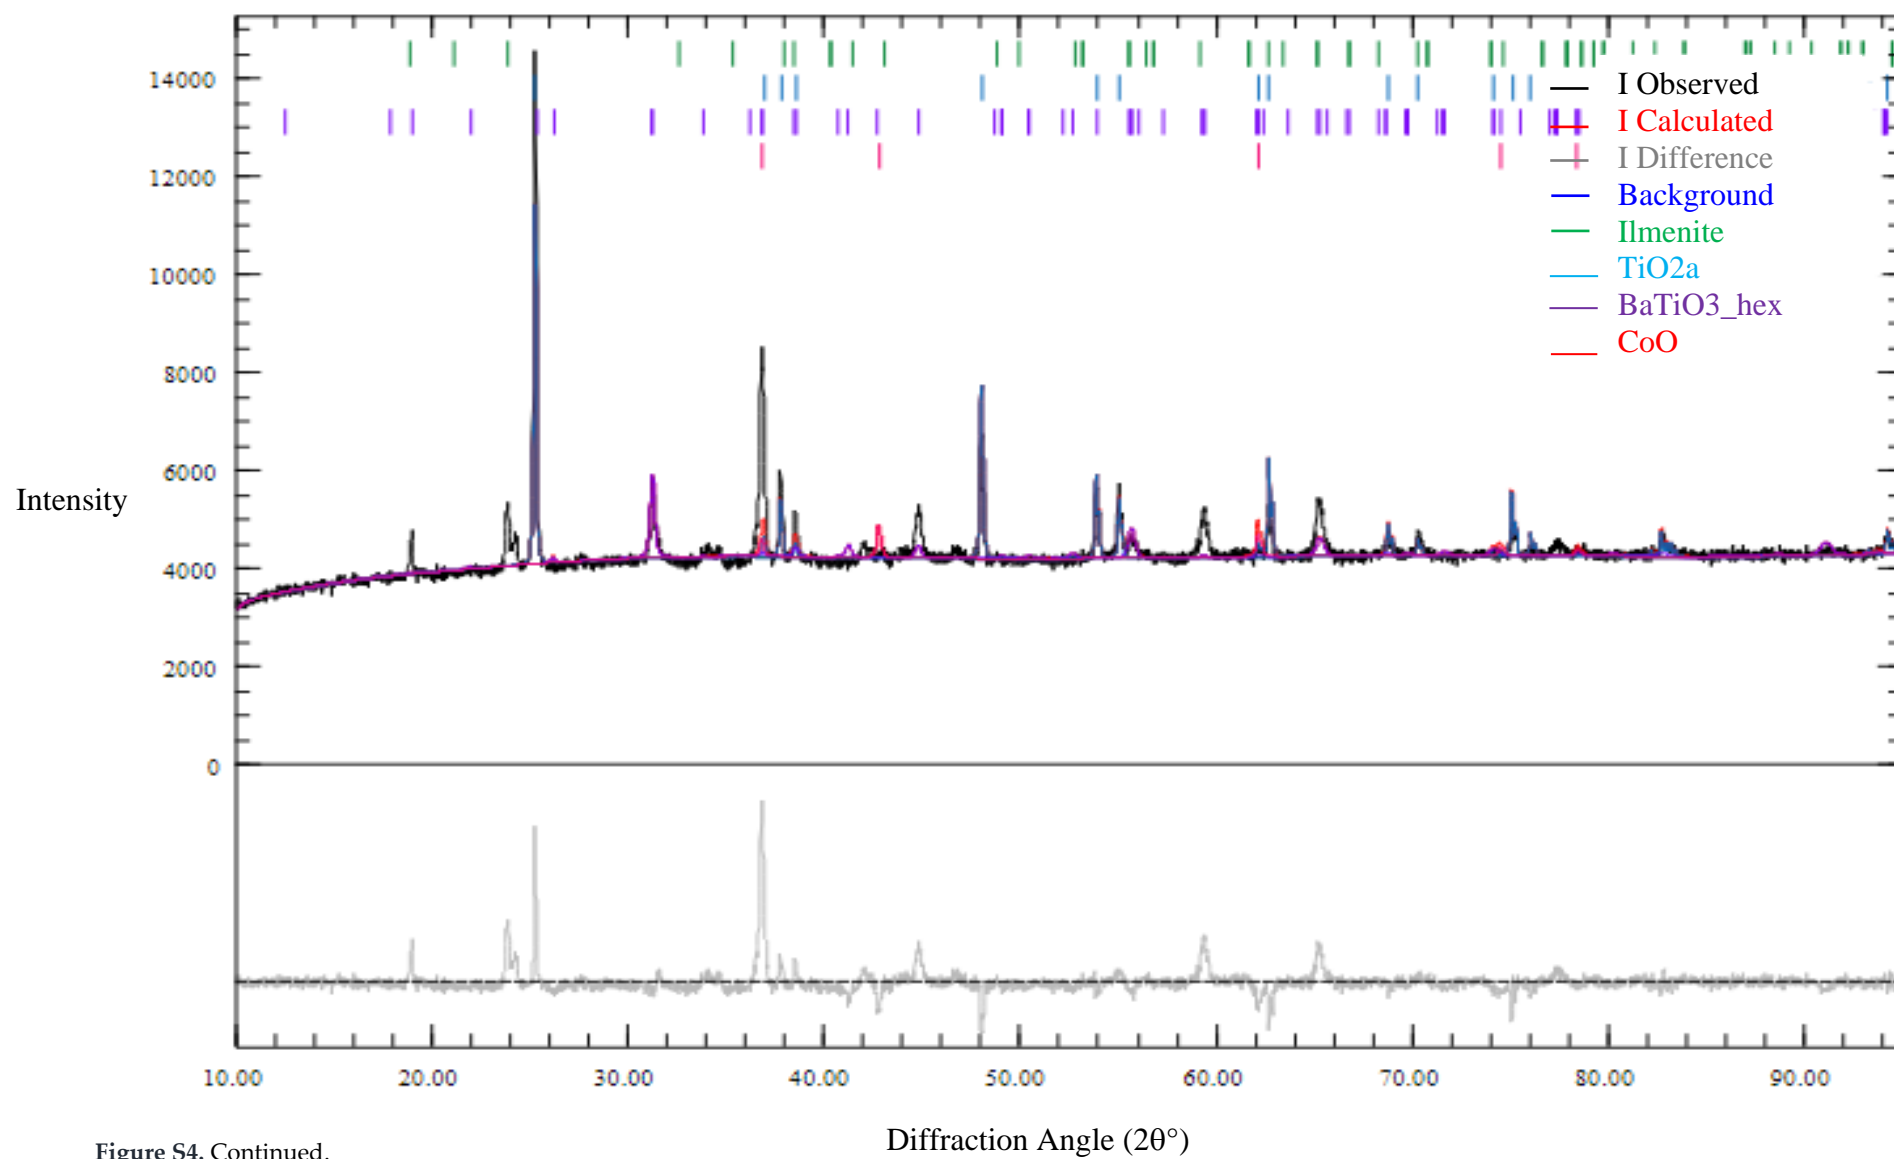

Figure S4. Continued.

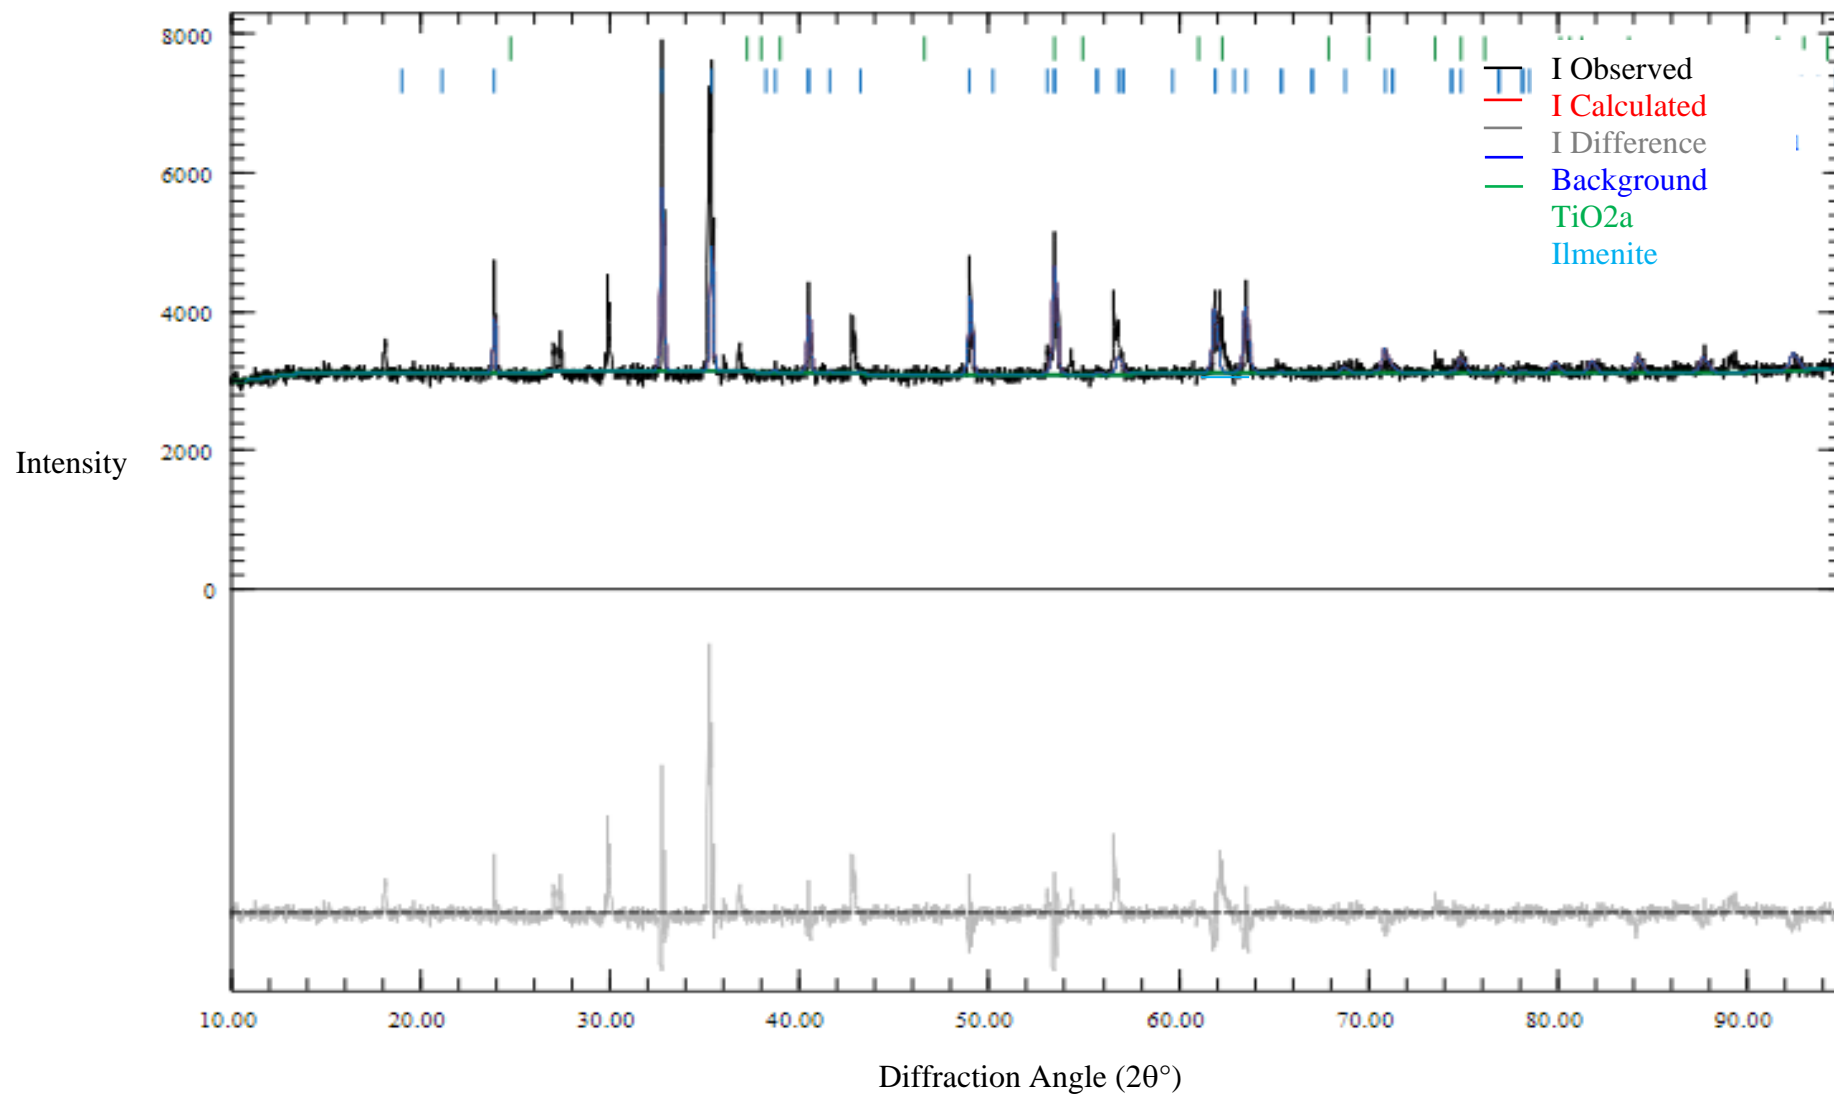

**Figure S4.** Rietveld refinement of synthesized (a) Ba<sub>0.9</sub>Co<sub>0.1</sub>TiO<sub>3</sub>, (b) Ba<sub>0.8</sub>Co<sub>0.2</sub>TiO<sub>3</sub>, (c) Ba<sub>0.7</sub>Co<sub>0.3</sub>TiO<sub>3</sub>, (d) Ba<sub>0.6</sub>Co<sub>0.4</sub>TiO<sub>3</sub>, (e) Ba<sub>0.5</sub>Co<sub>0.5</sub>TiO<sub>3</sub>, (f) Ba<sub>0.4</sub>Co<sub>0.6</sub>TiO<sub>3</sub>, (g) Ba<sub>0.3</sub>Co<sub>0.7</sub>TiO<sub>3</sub>, (h) Ba<sub>0.2</sub>Co<sub>0.8</sub>TiO<sub>3</sub>, (i) Ba<sub>0.1</sub>Co<sub>0.9</sub>TiO<sub>3</sub>, and (j) CoTiO<sub>3</sub> structure using Profex BGMN software.

#### 4. TEM

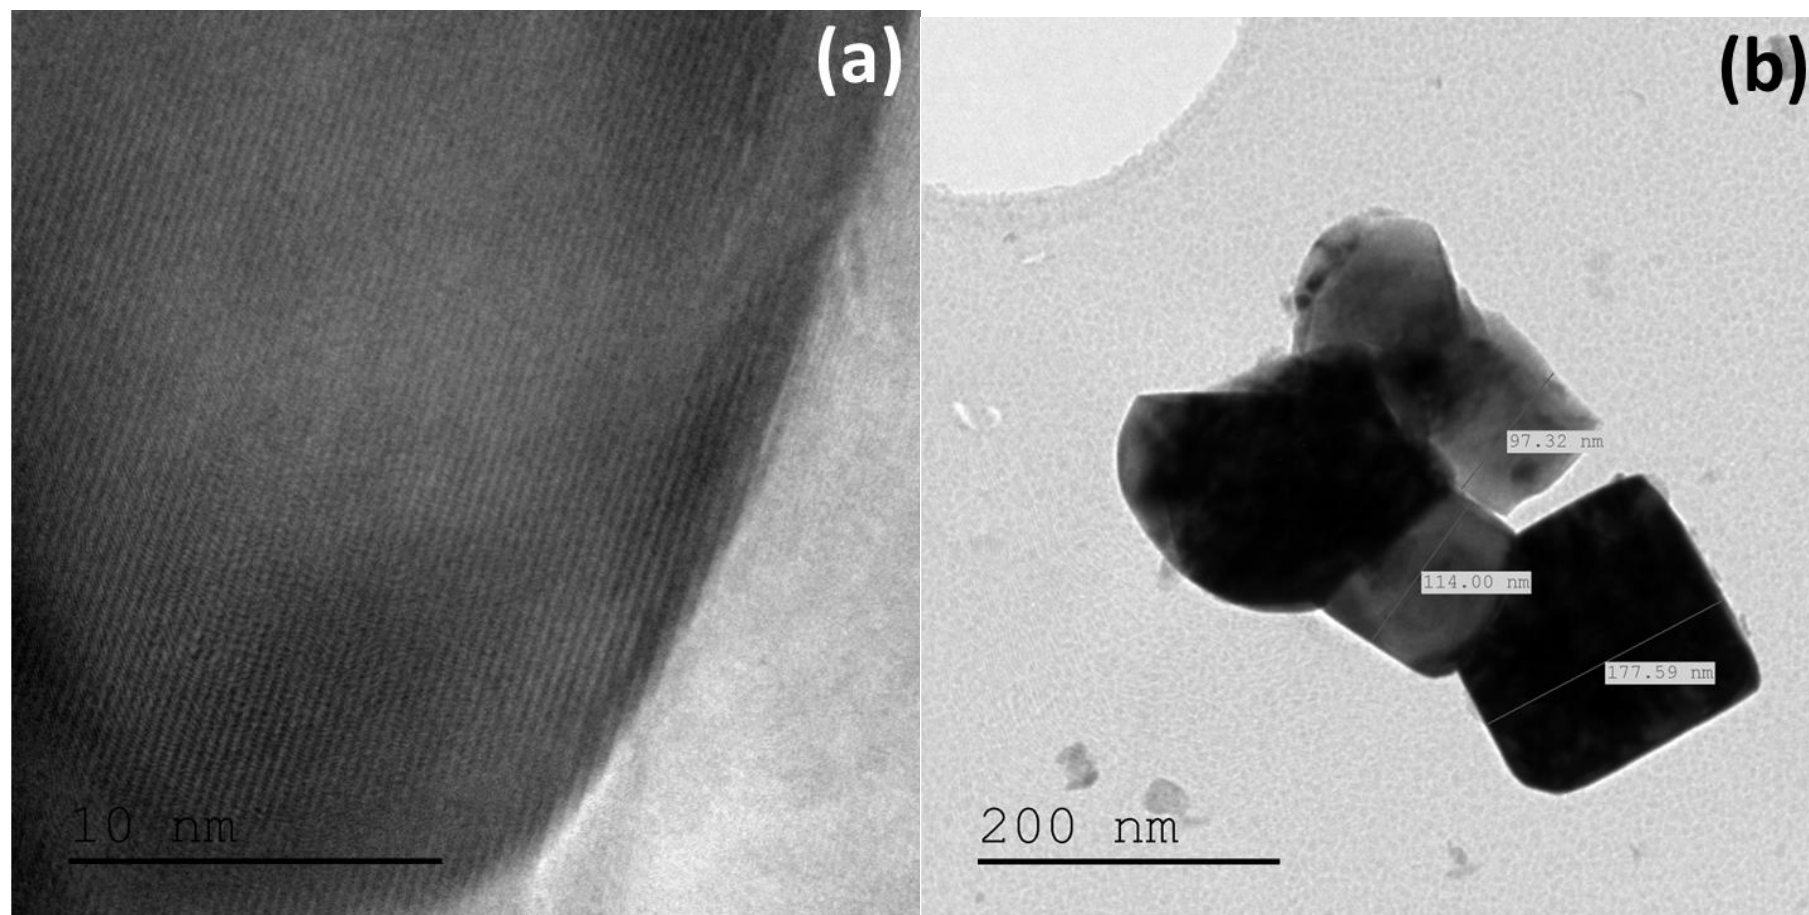

Figure S5. Continued.

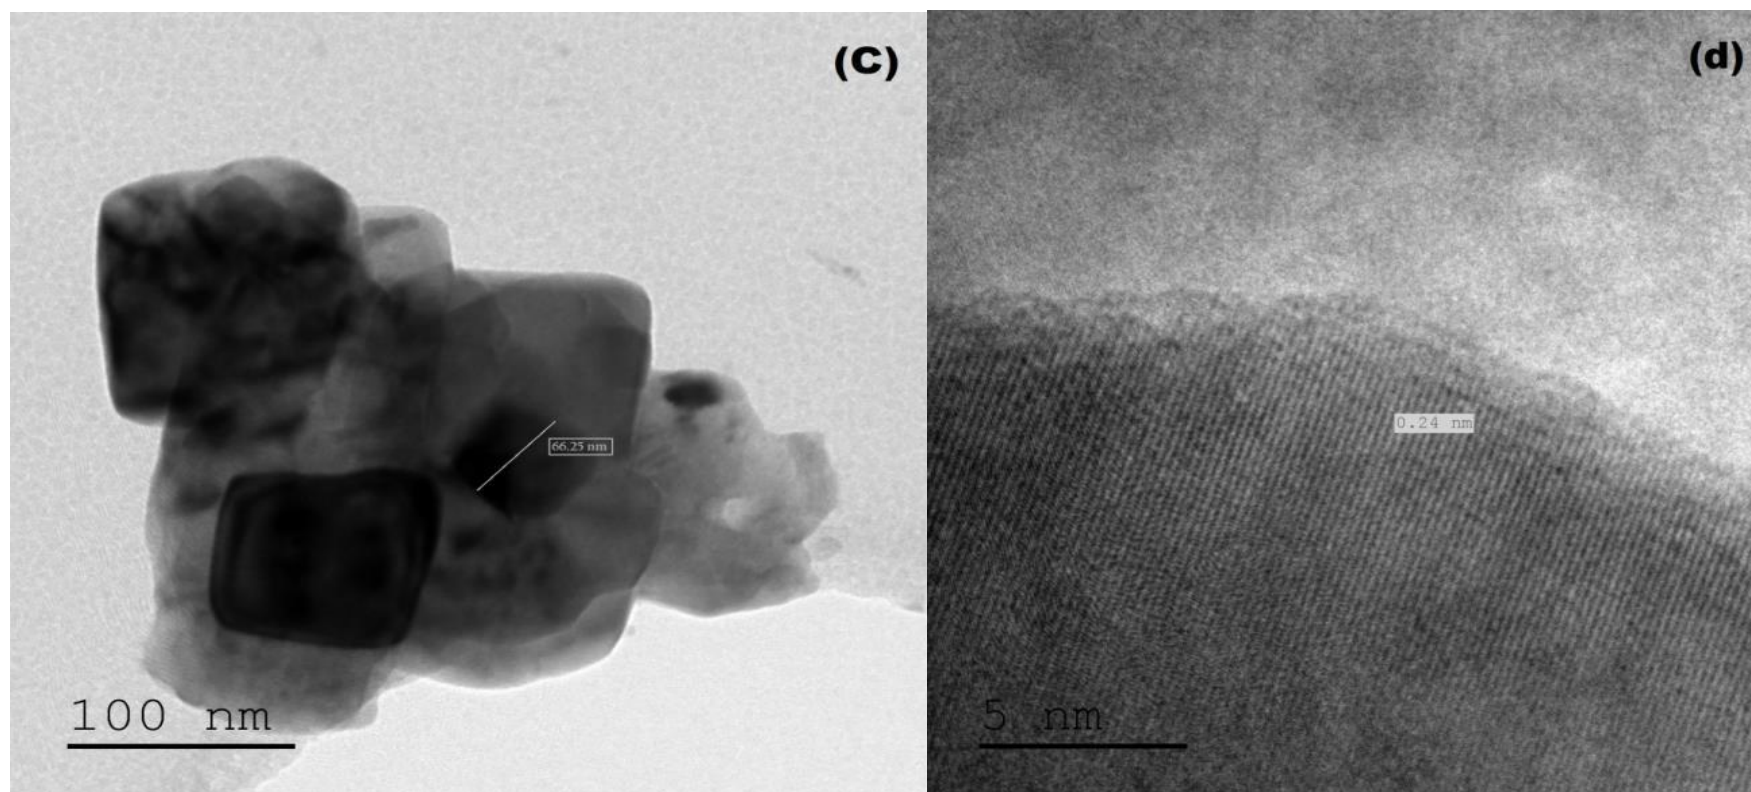

Figure S5. Continued.



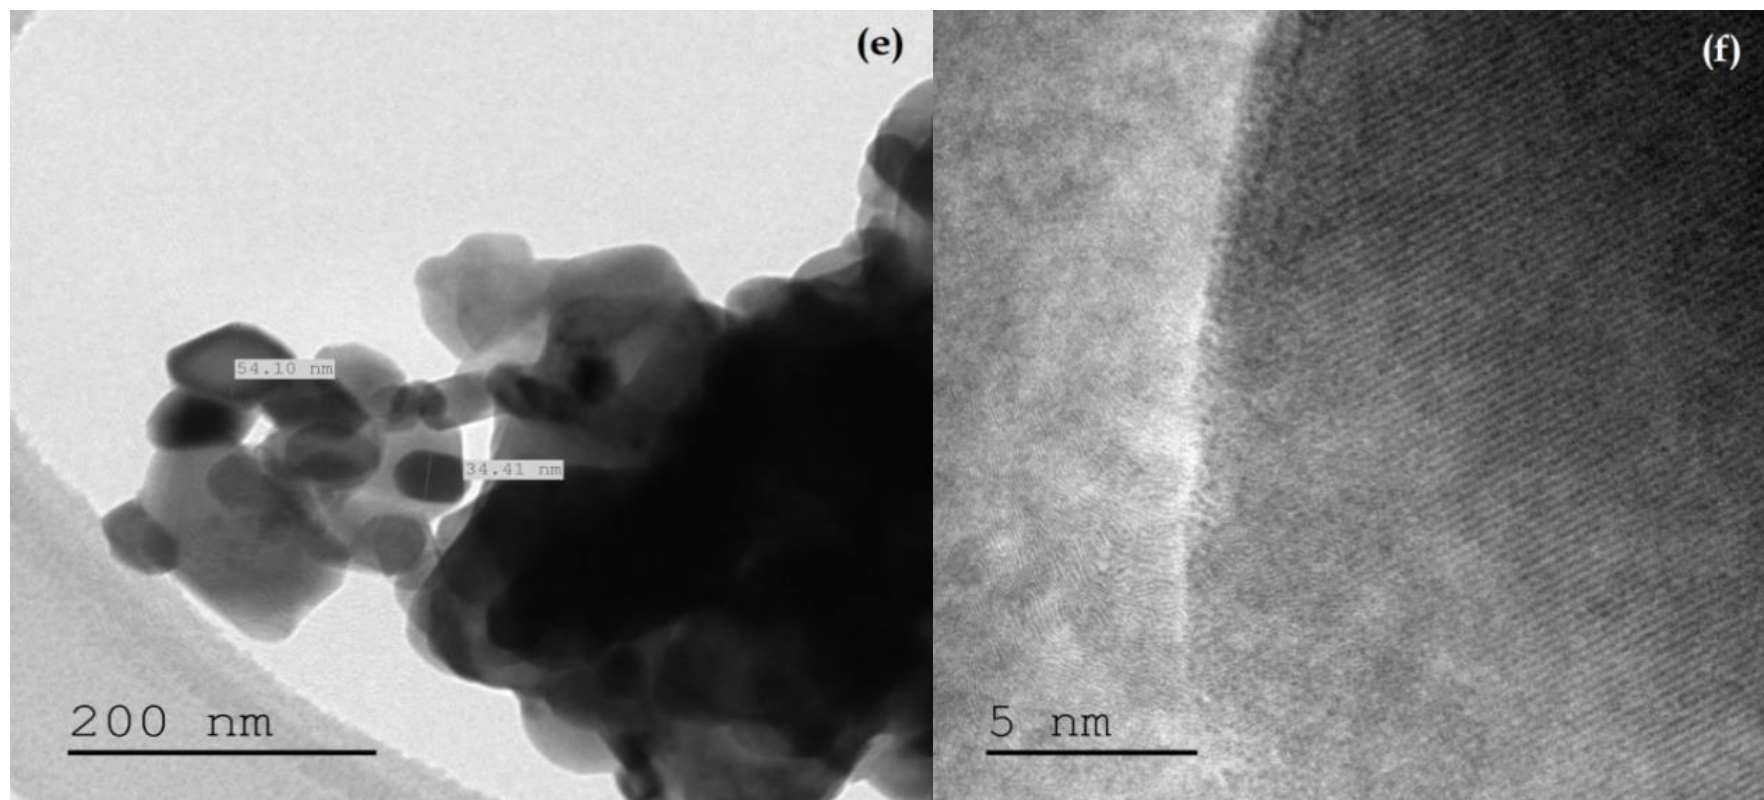

**Figure S5.** Continued.



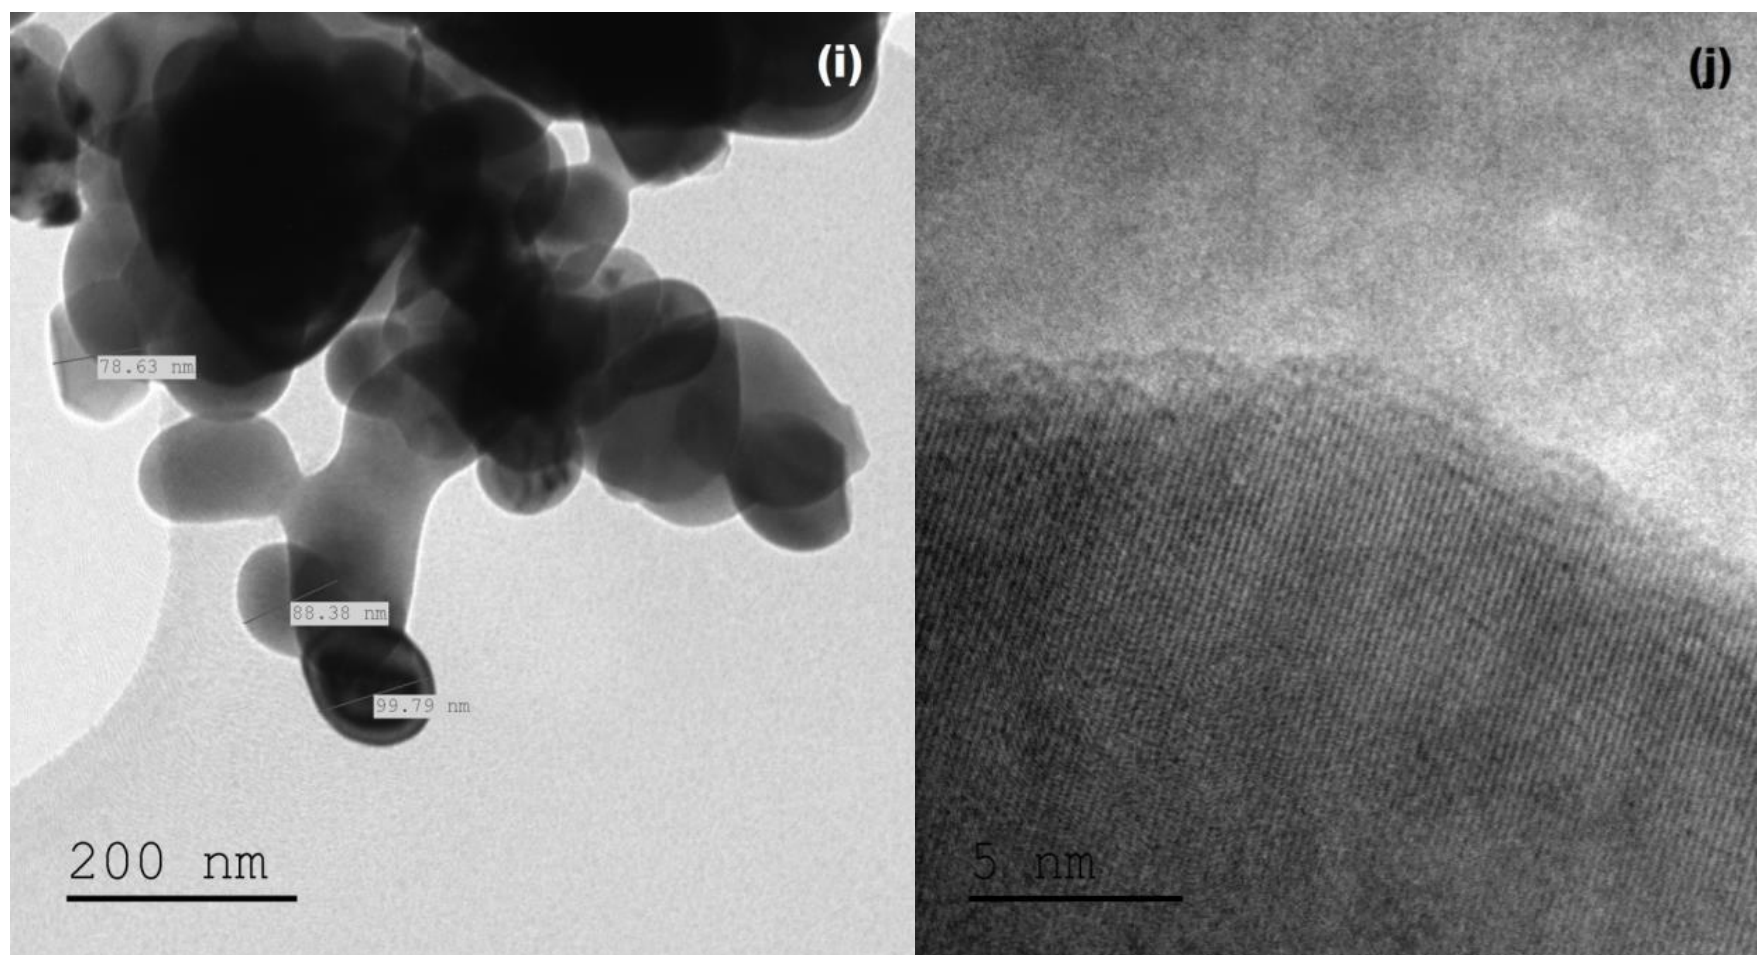

**Figure S5.** Continued.

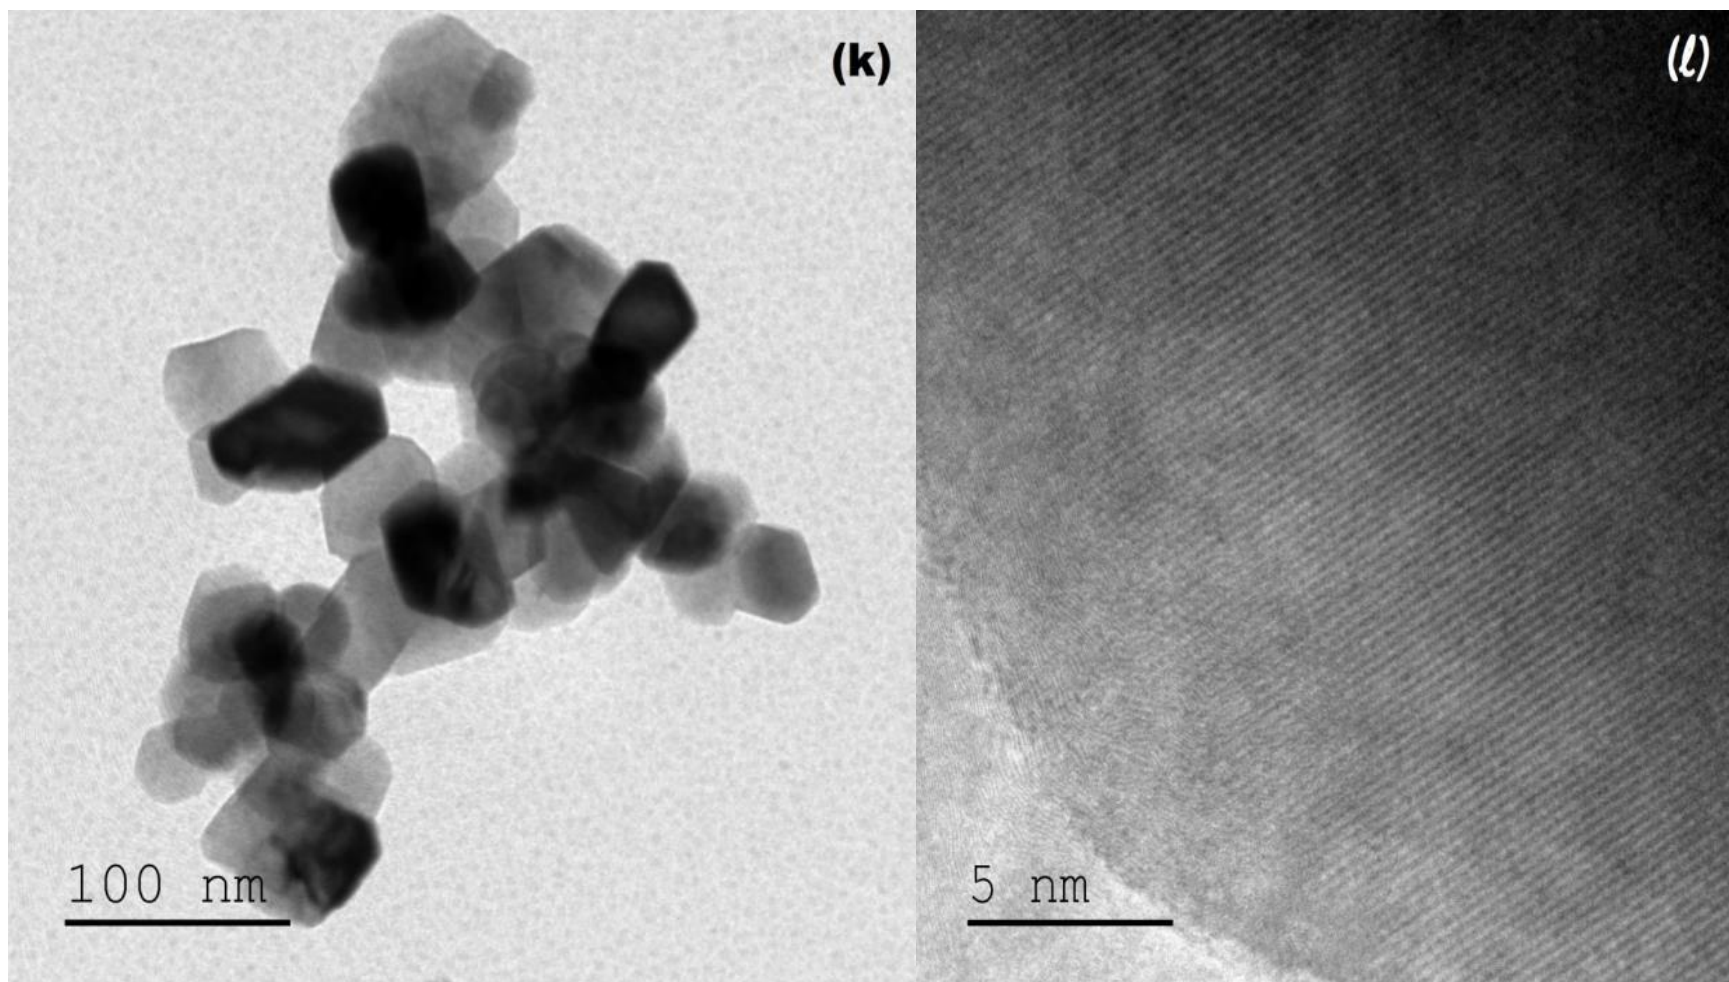

**Figure S5.** TEM micrographs and high-resolution images, respectively for (a), (b) pure BT sample, (c)-(d)  $\text{Ba}_{1-x}\text{Co}_x\text{TiO}_3$  sample with  $x = 0.2$ ; (e)-(f)  $\text{Ba}_{1-x}\text{Co}_x\text{TiO}_3$  sample with  $x = 0.4$ ; (i)-(j)  $\text{Ba}_{1-x}\text{Co}_x\text{TiO}_3$  sample with  $x = 0.8$ , and (k)-(l)  $\text{Ba}_{1-x}\text{Co}_x\text{TiO}_3$  sample with  $x = 1$  ( $\text{CoTiO}_3$  complex).

## 5. UV-Visible

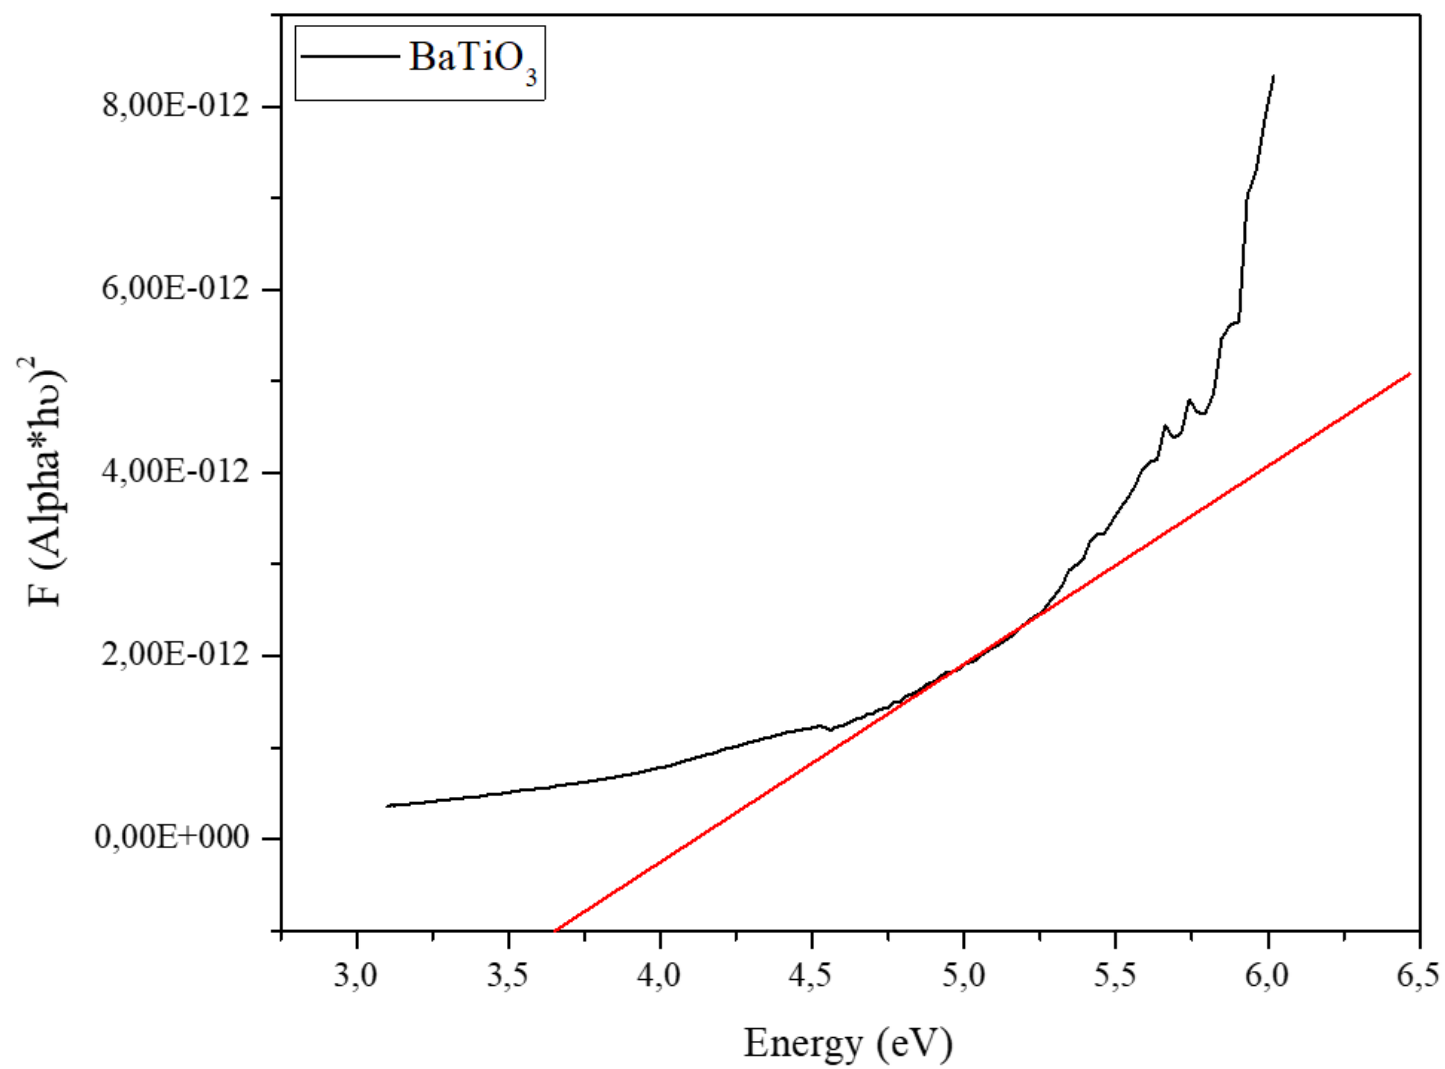

Figure S6. Continued.

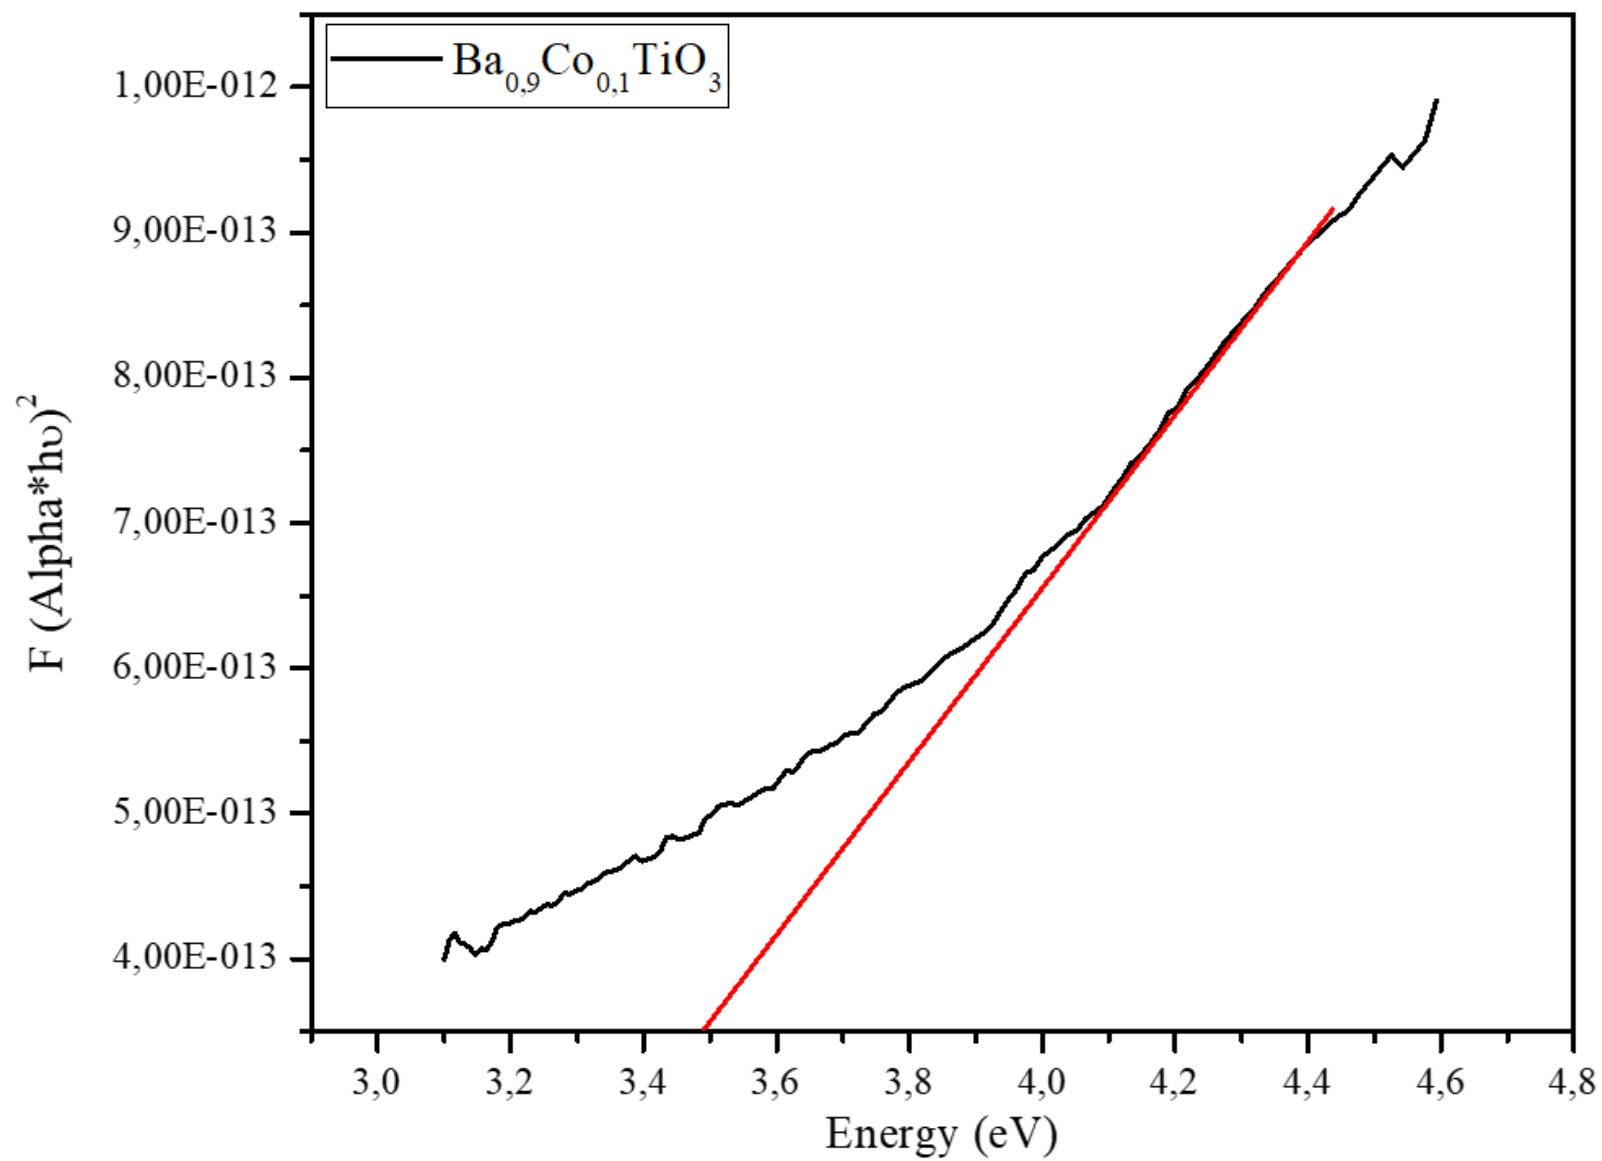

(b)

Figure S6. Continued.

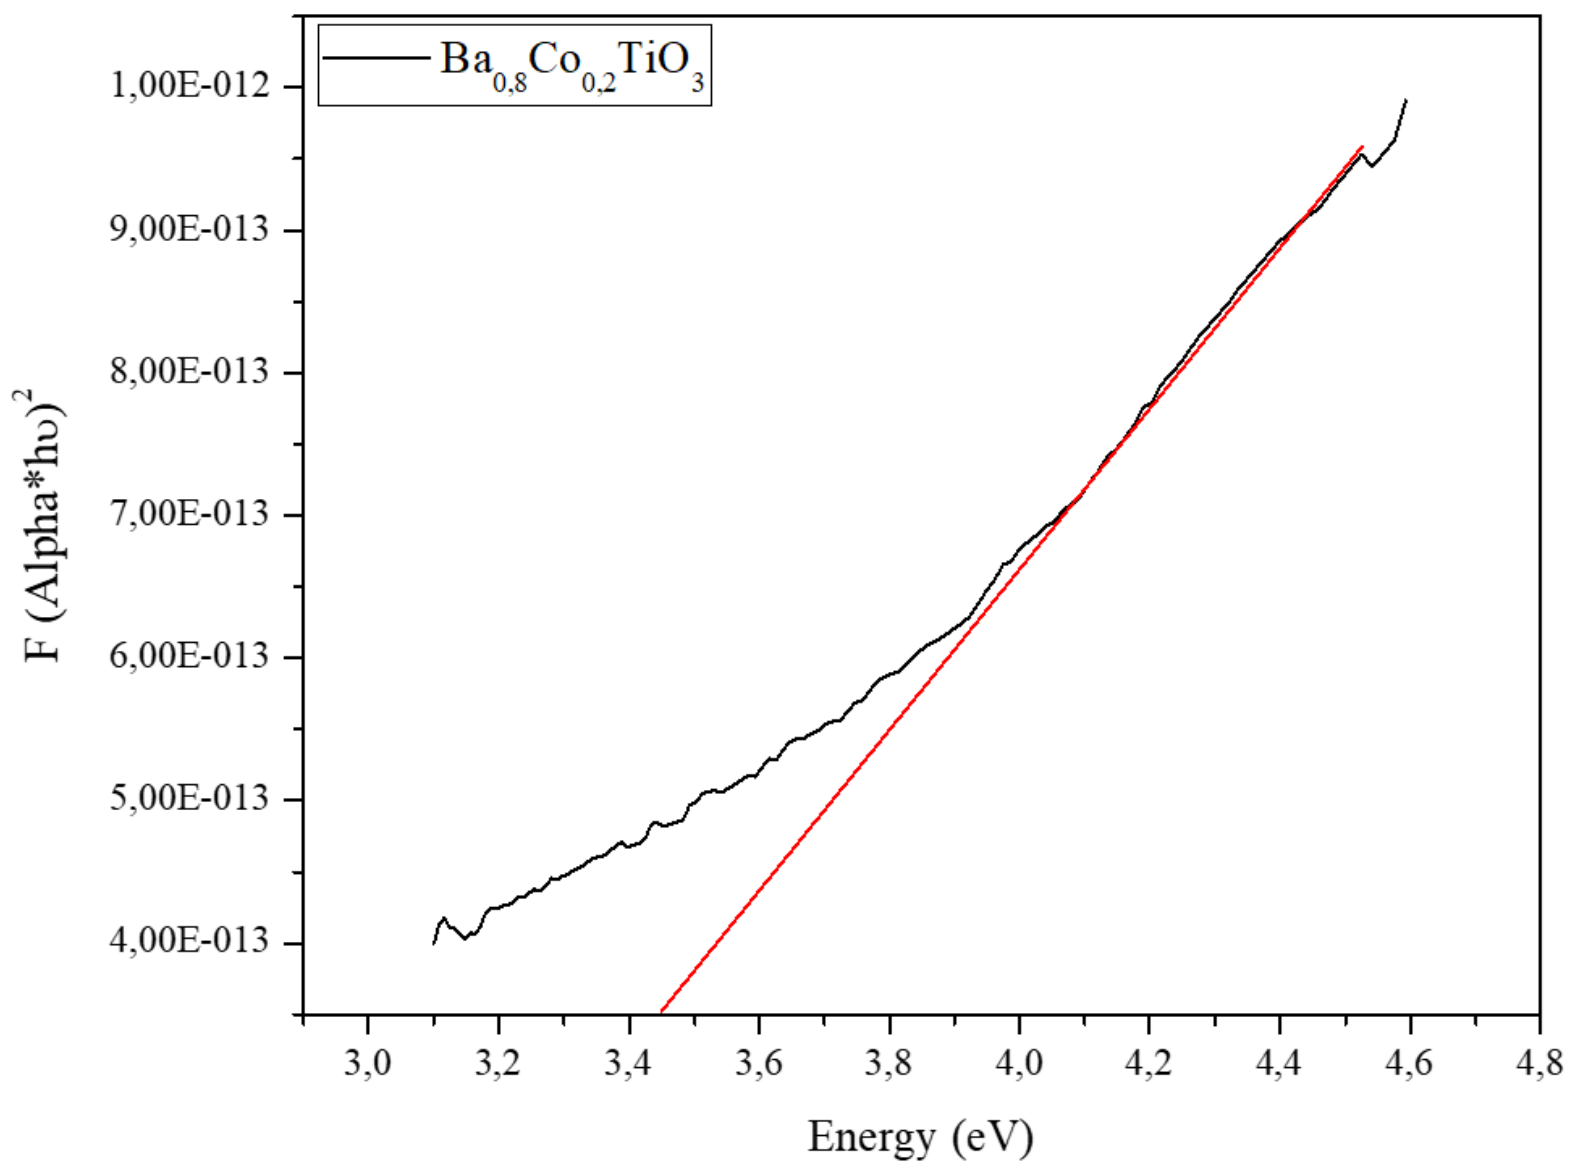

(c)

Figure S6. Continued.

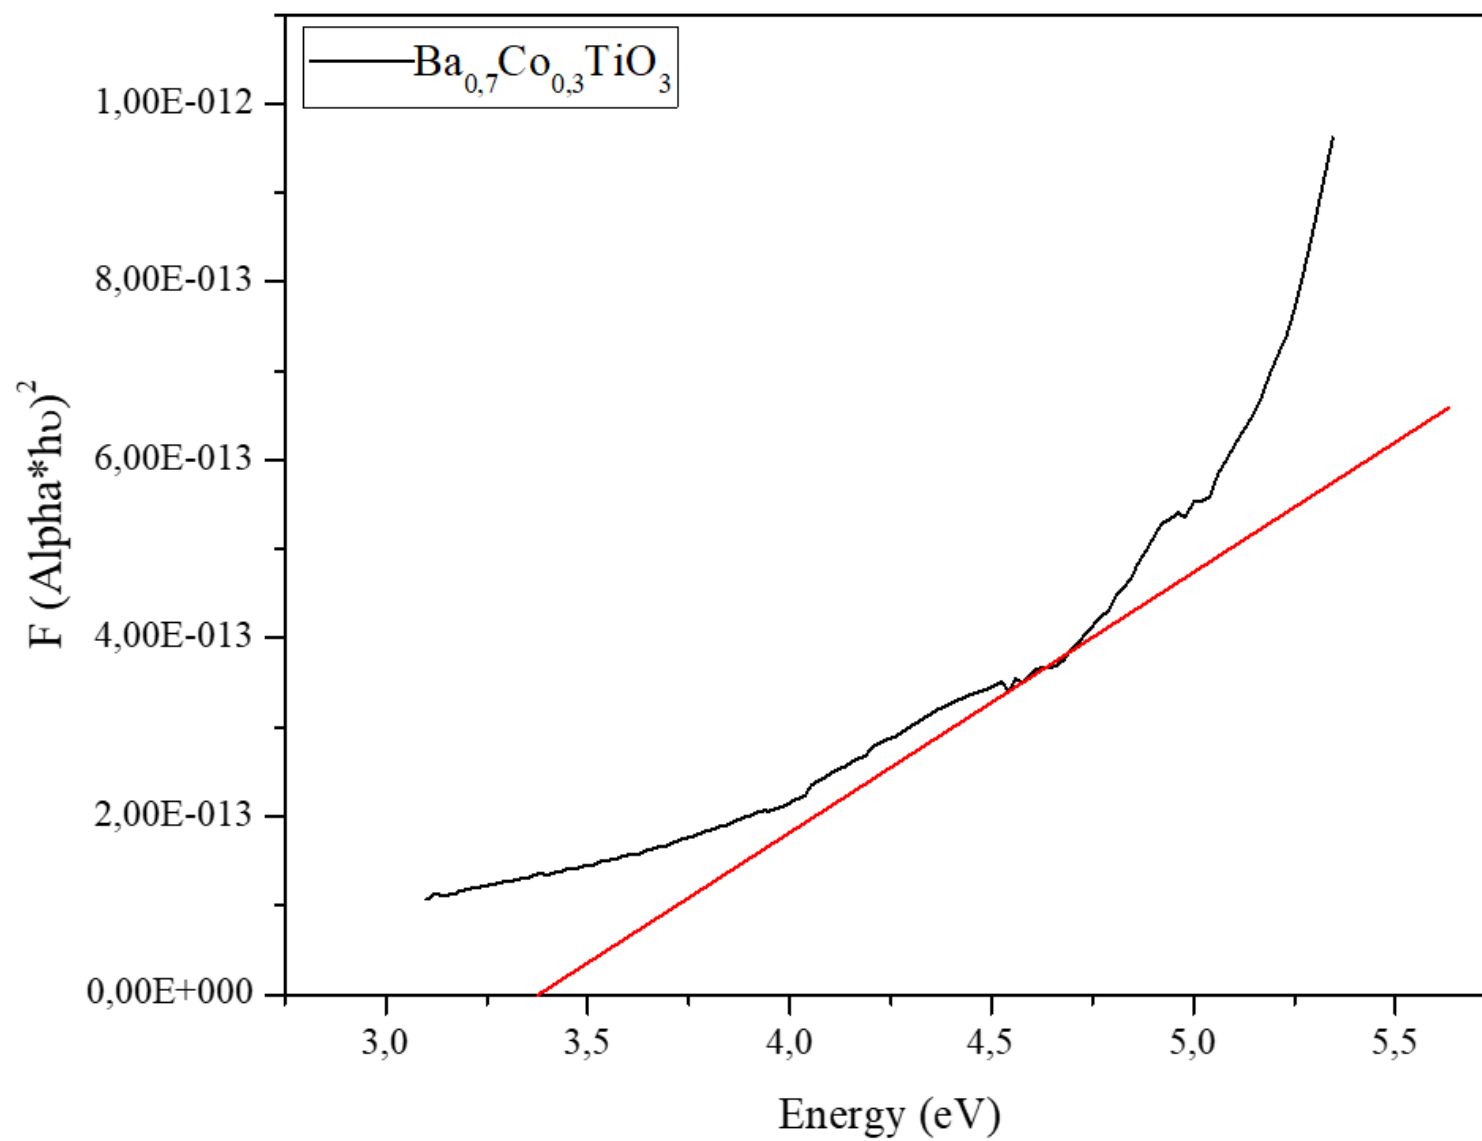

(d)

Figure S6. Continued.

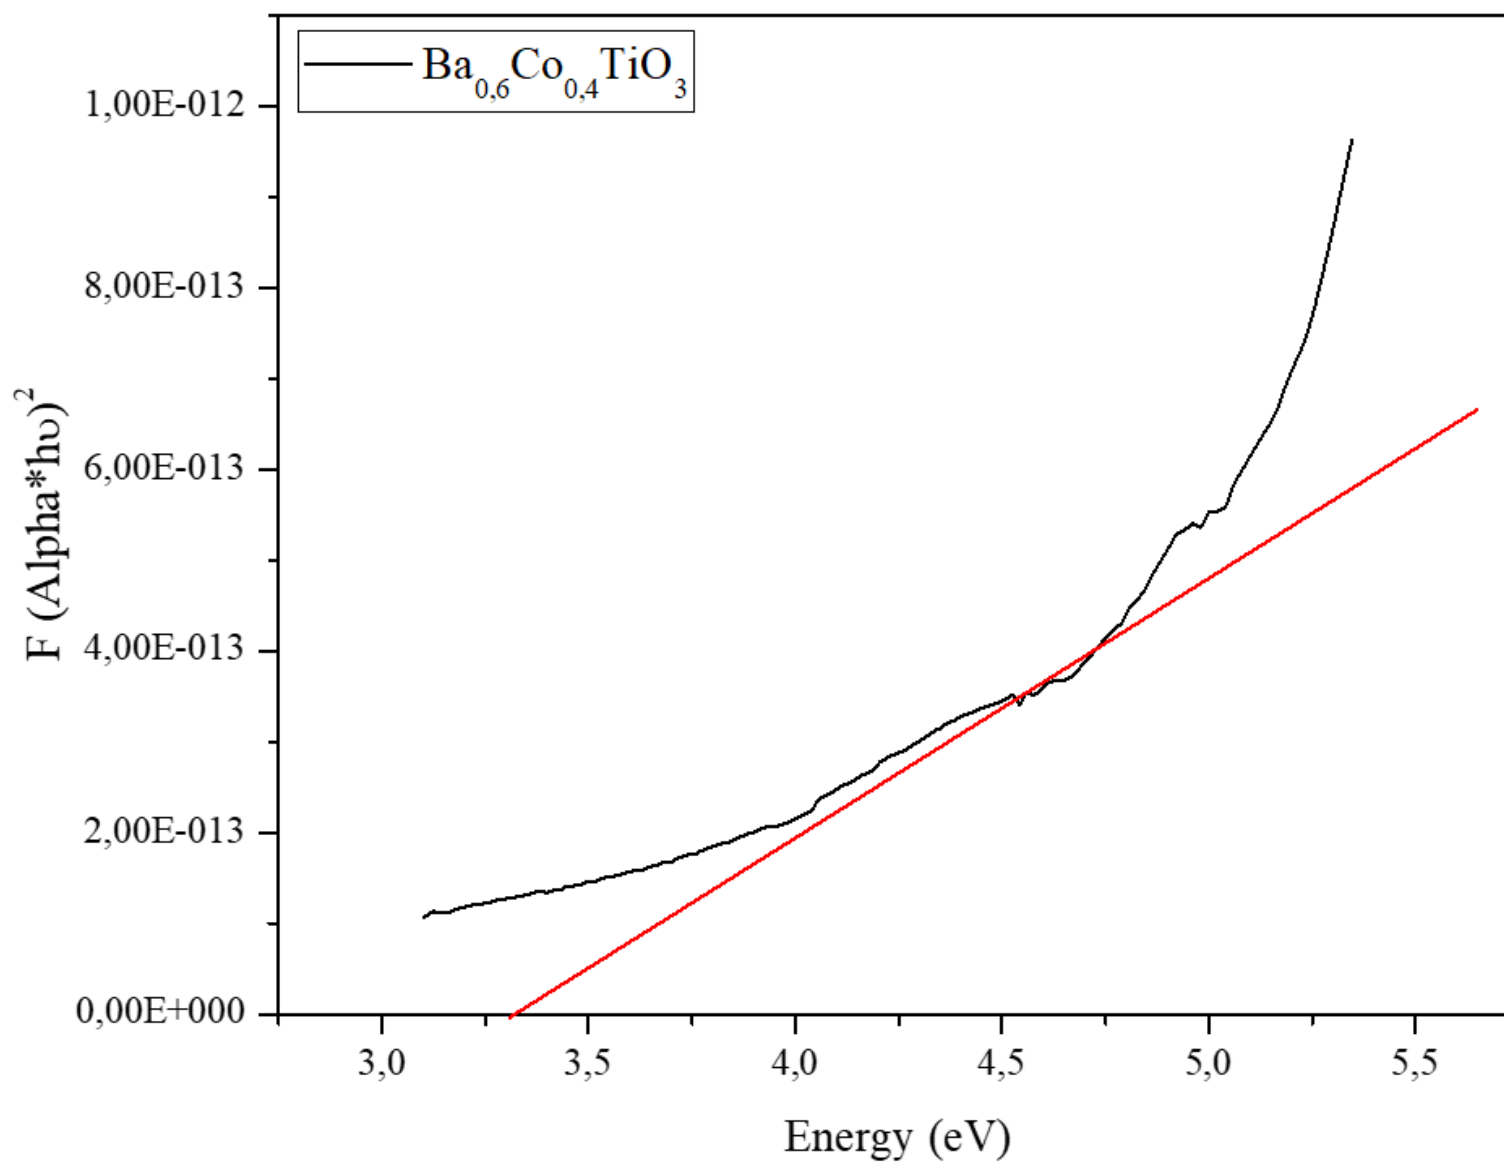

(e)

Figure S6. Continued.

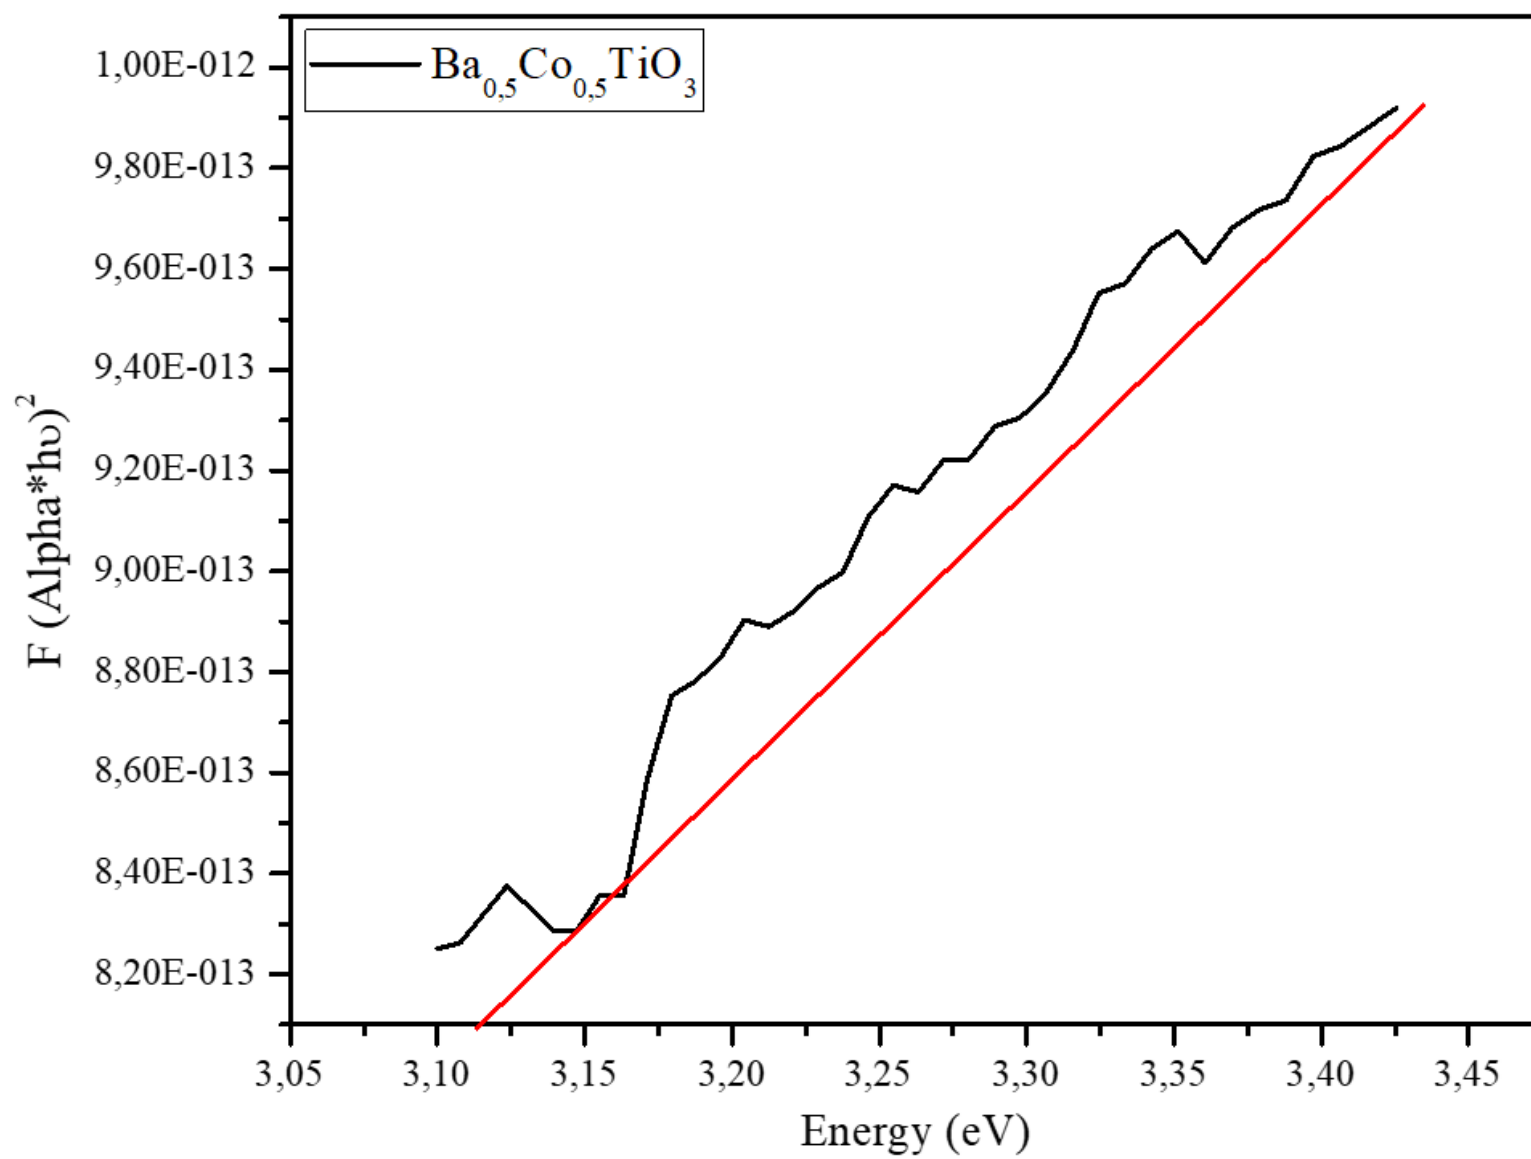

(f)

Figure S6. Continued.



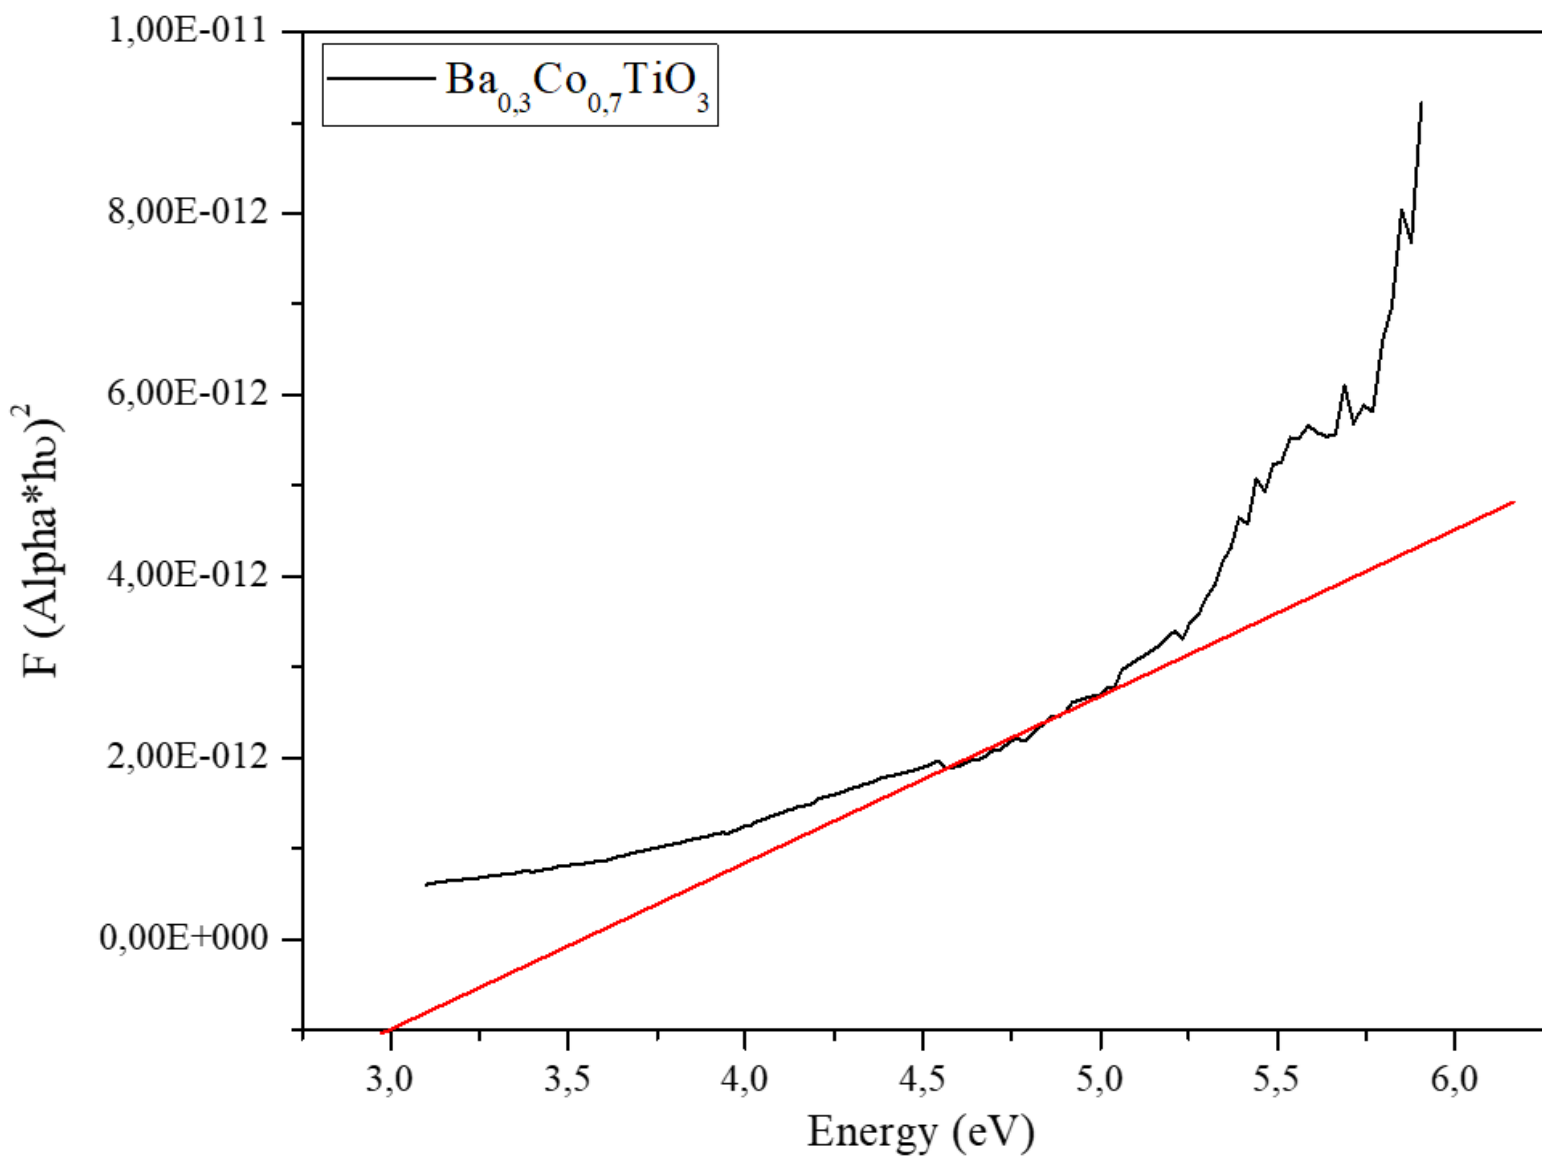

(g)

Figure S6. Continued.

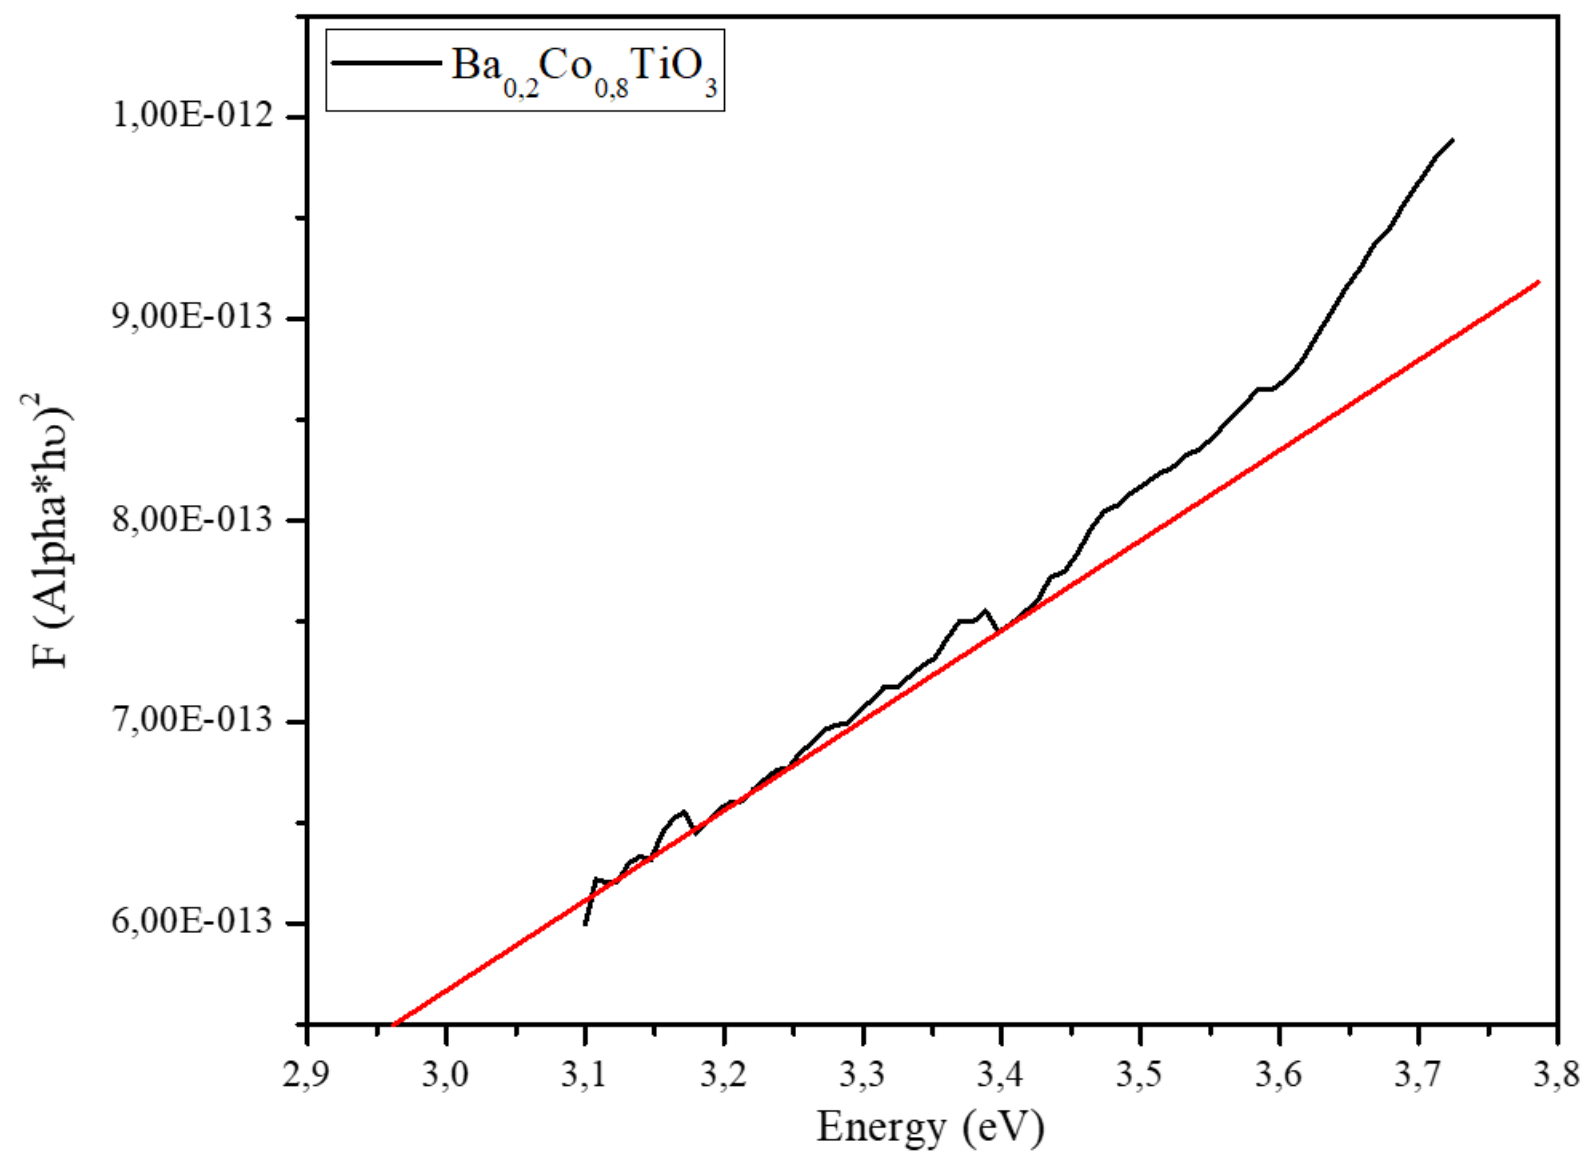

(h)

Figure S6. Continued.

(i)

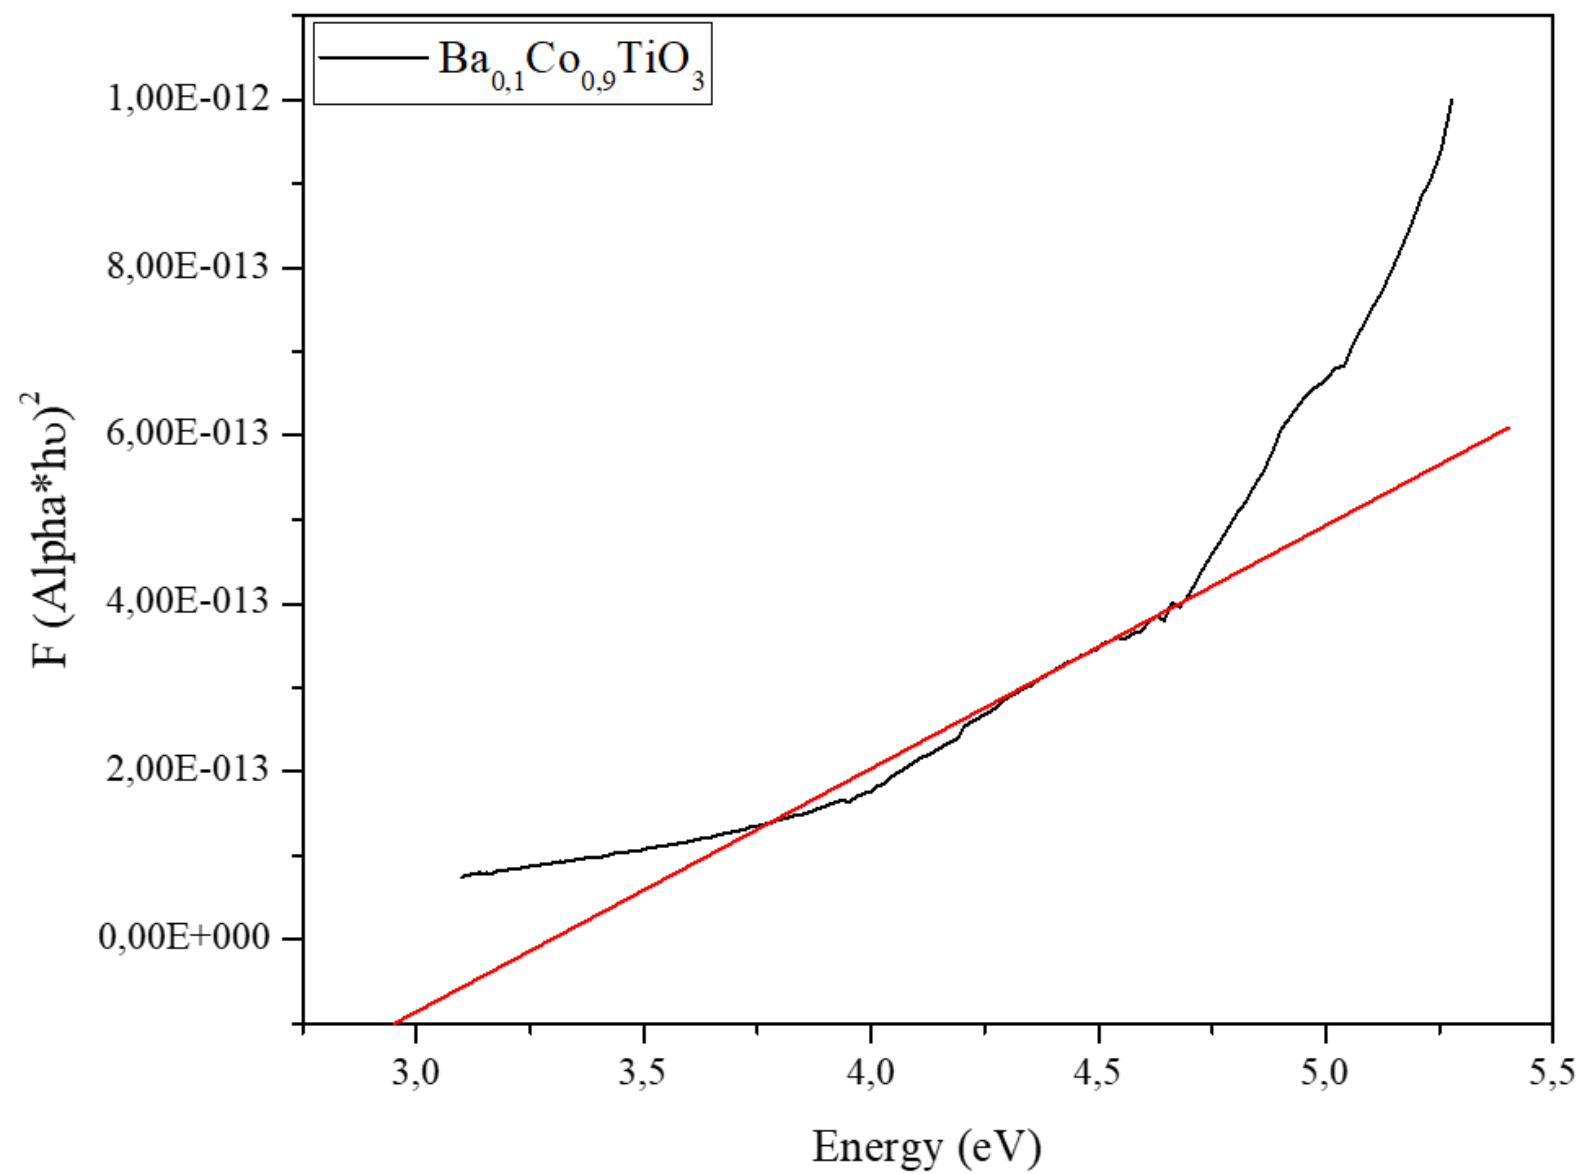

Figure S6. Continued.

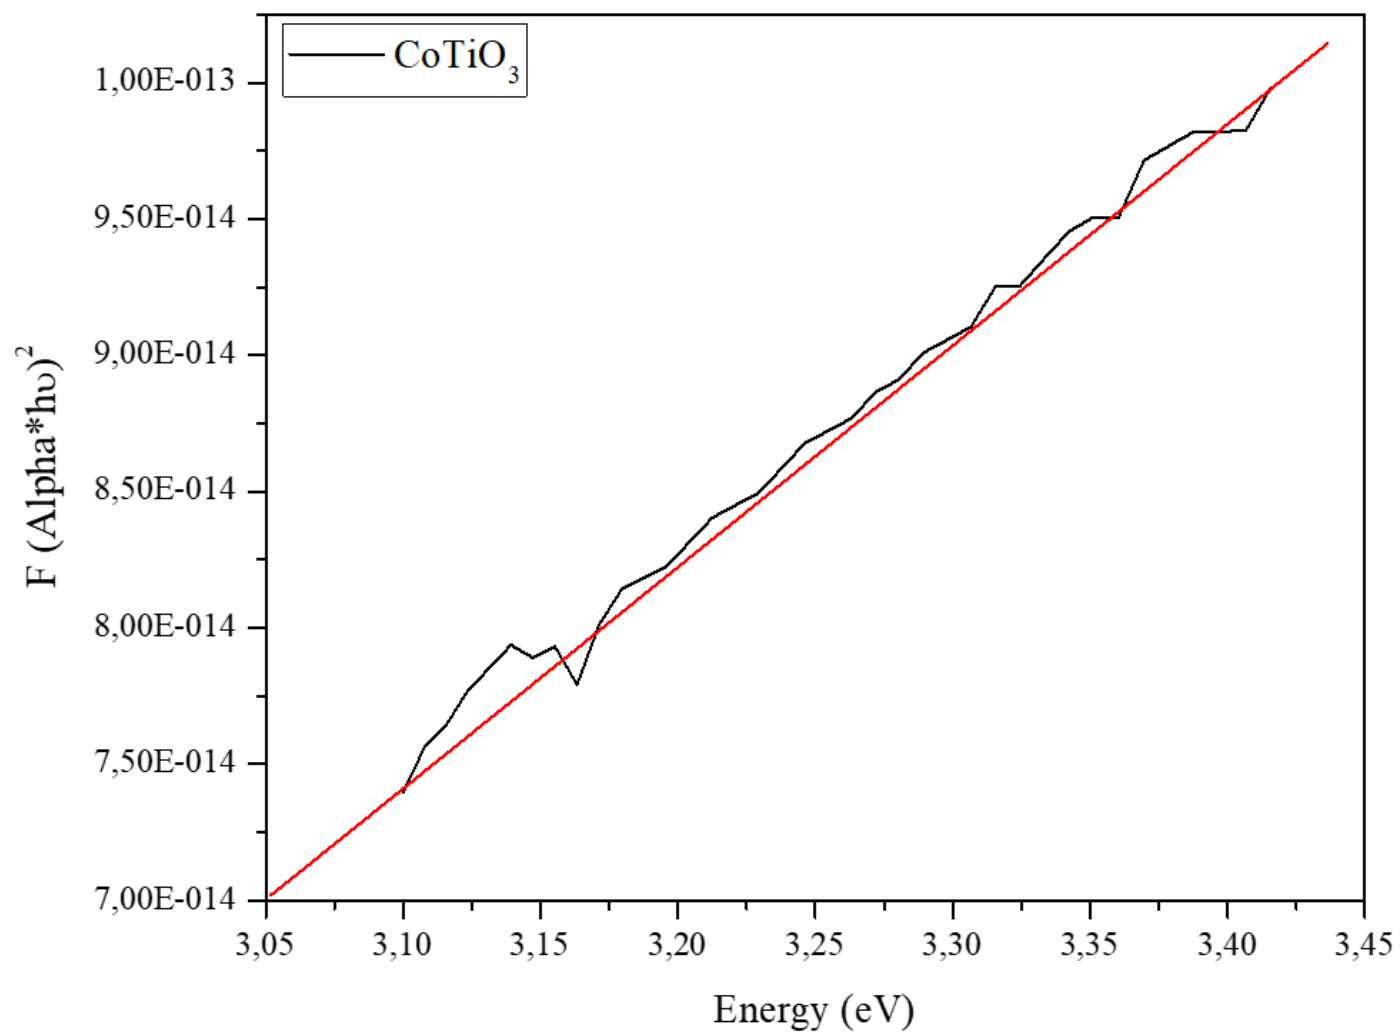

(j)

**Figure S6.** Estimation of band gap energy using Tauc Plot method for  $\text{Ba}_{1-x}\text{Co}_x\text{TiO}_3$   $\{x = 0, \dots, 1\}$  samples; (a)  $\text{BaTiO}_3$ ; (b)  $\text{Ba}_{0.9}\text{Co}_{0.1}\text{TiO}_3$ ; (c)  $\text{Ba}_{0.8}\text{Co}_{0.2}\text{TiO}_3$ ; (d)  $\text{Ba}_{0.7}\text{Co}_{0.3}\text{TiO}_3$ ; (e)  $\text{Ba}_{0.6}\text{Co}_{0.4}\text{TiO}_3$ ; (f)  $\text{Ba}_{0.5}\text{Co}_{0.5}\text{TiO}_3$ ; (g)  $\text{Ba}_{0.3}\text{Co}_{0.7}\text{TiO}_3$ ; (h)  $\text{Ba}_{0.2}\text{Co}_{0.8}\text{TiO}_3$ ; (i)  $\text{Ba}_{0.1}\text{Co}_{0.9}\text{TiO}_3$  and (j)  $\text{CoTiO}_3$ .

## 6. Photocatalytic Application

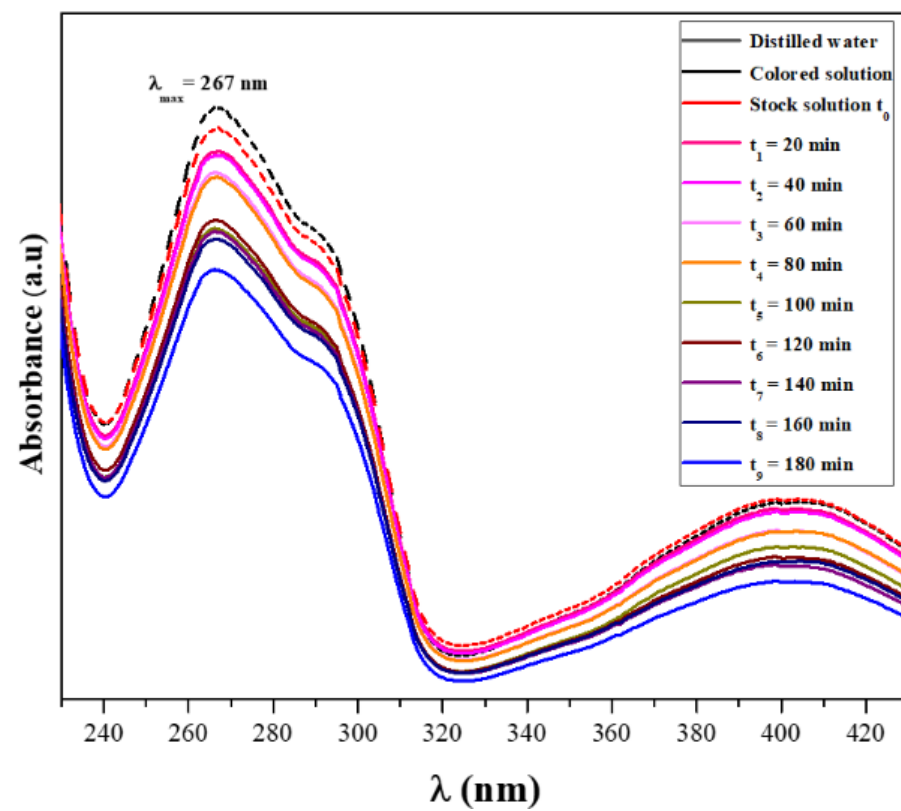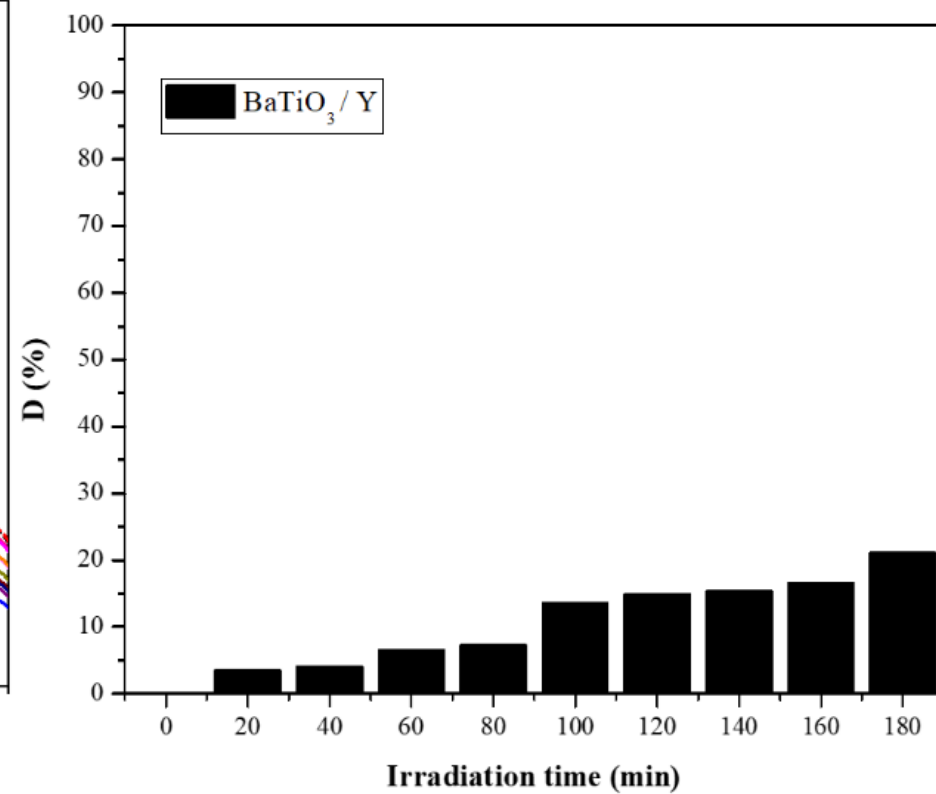

(a)

Figure S7. Continued.

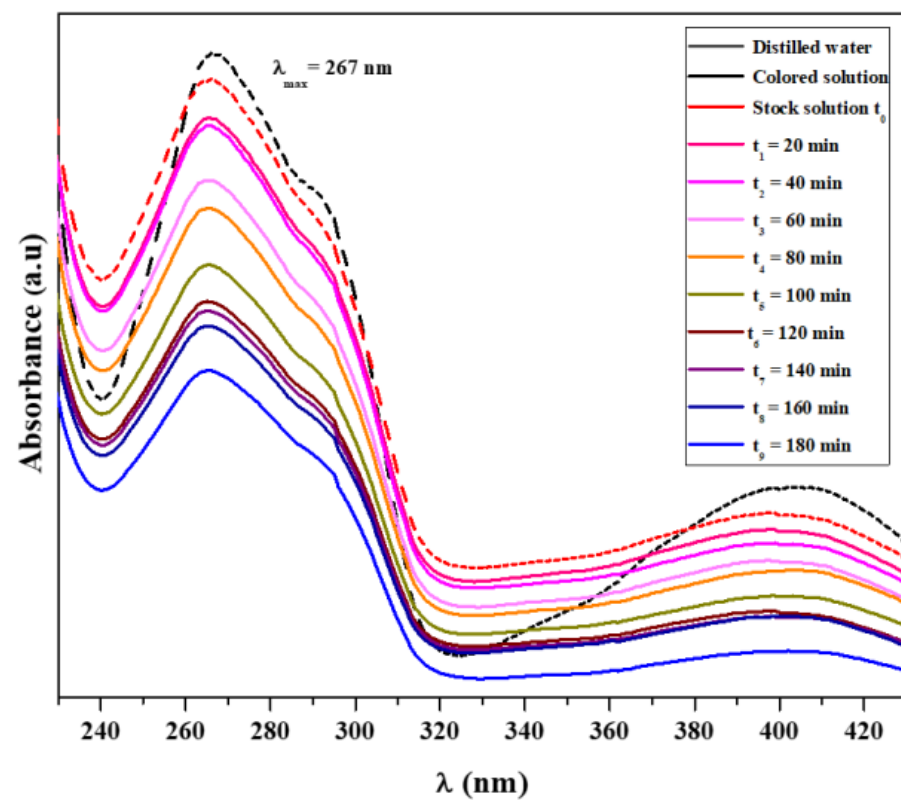

Figure S7. Continued.

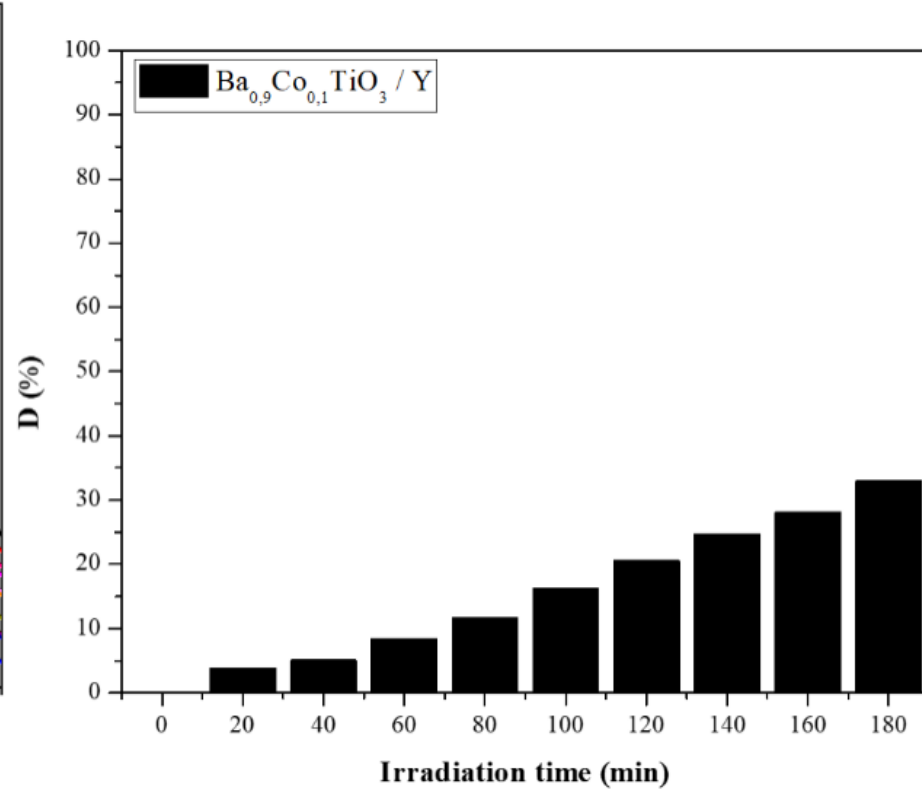

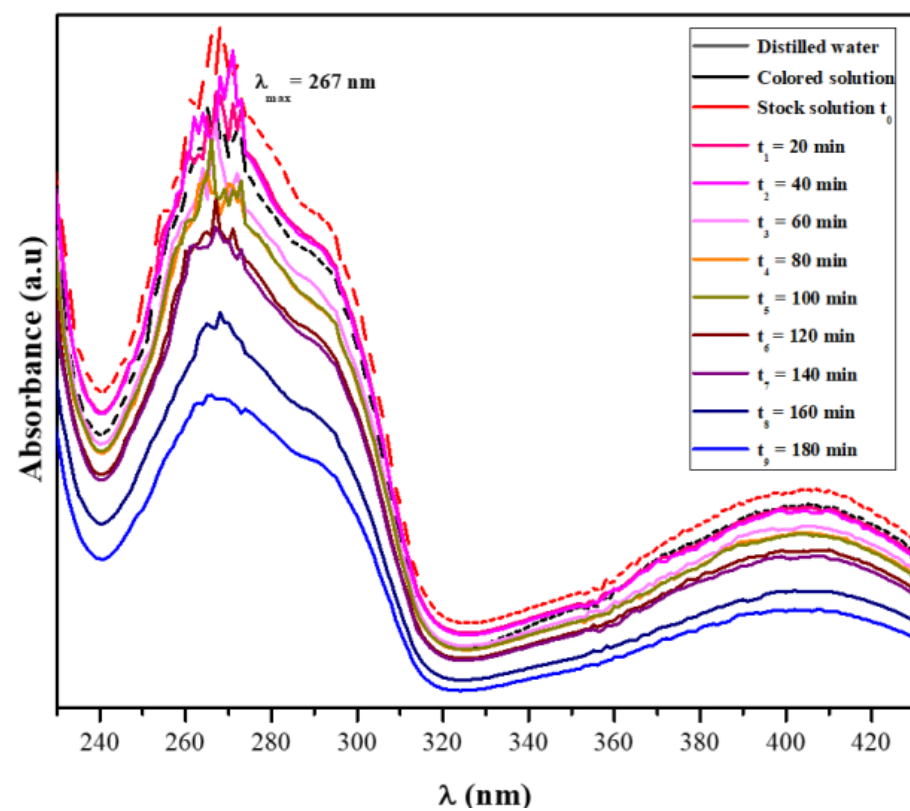

Figure S7. Continued.

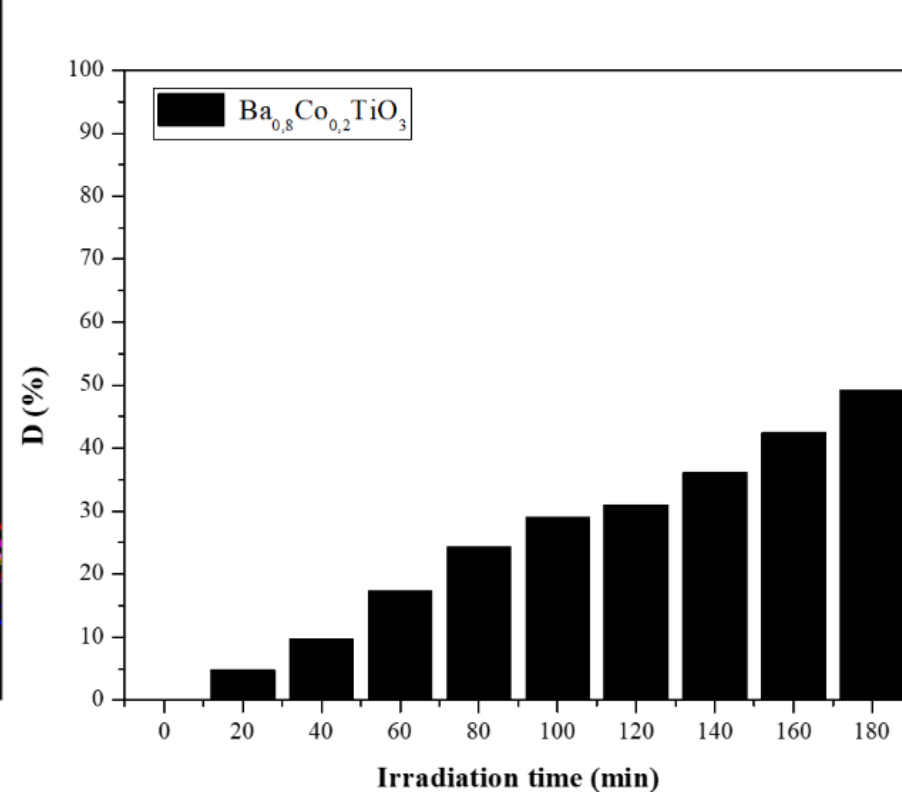

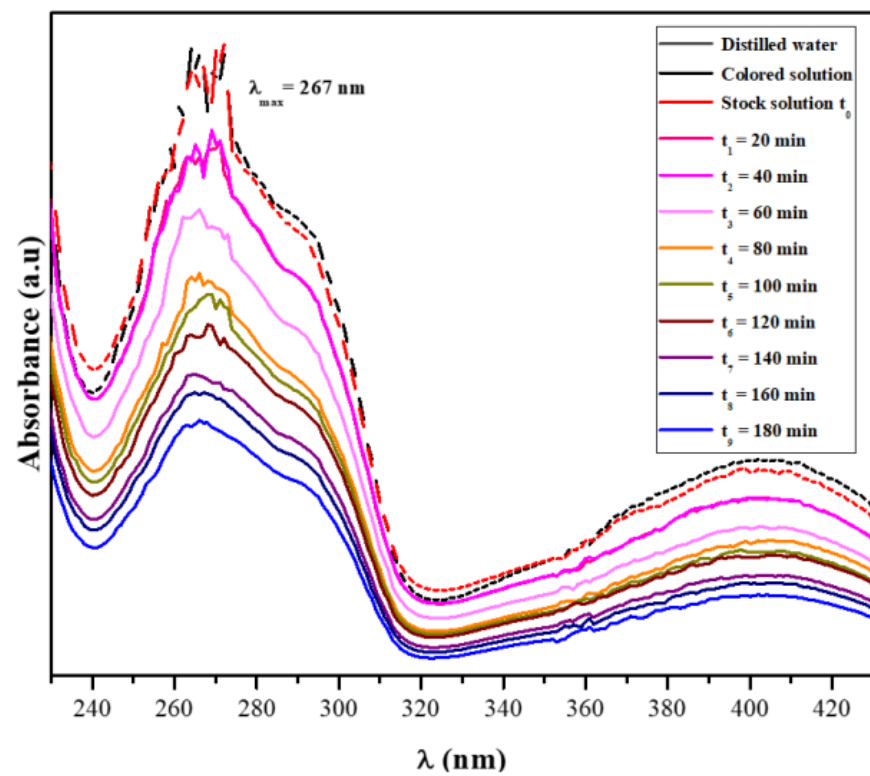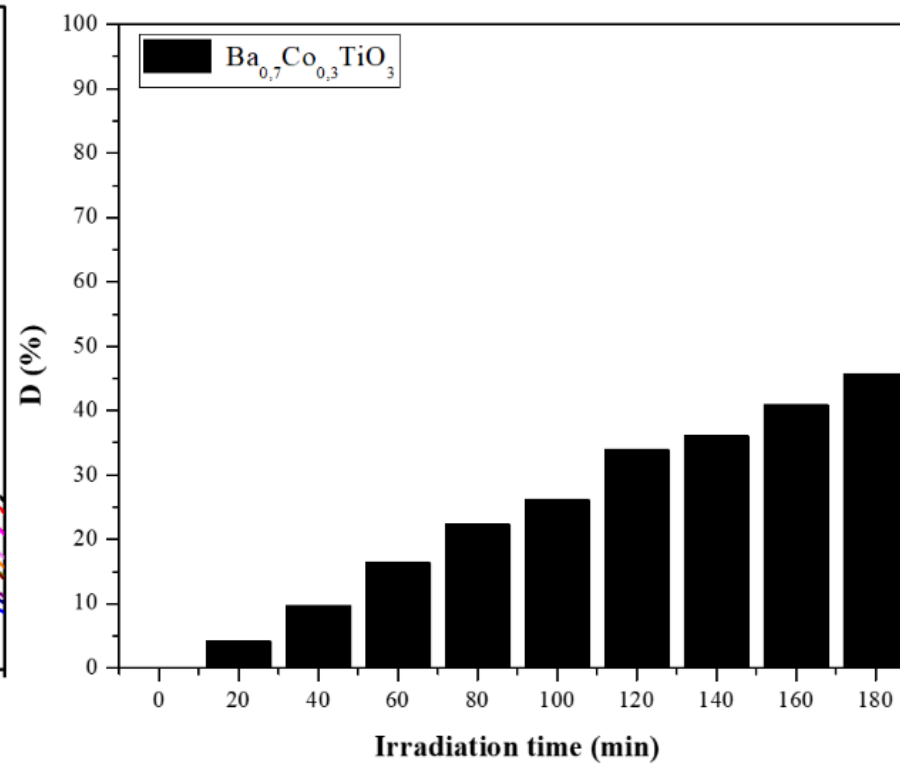

(d)

Figure S7. Continued.



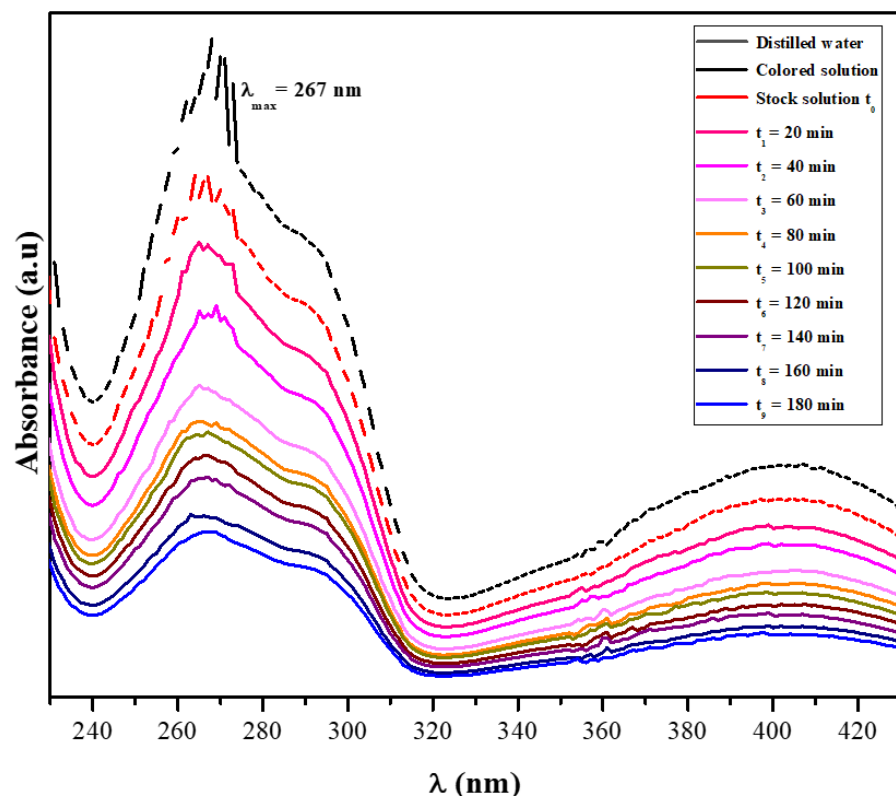

Figure S7. Continued.

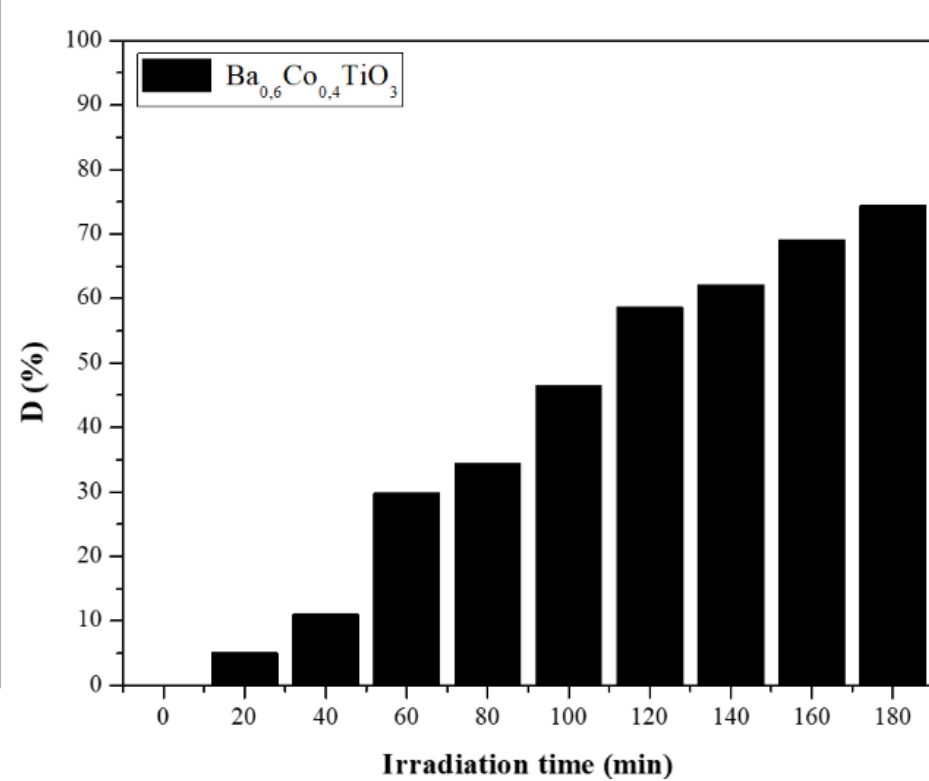

(e)

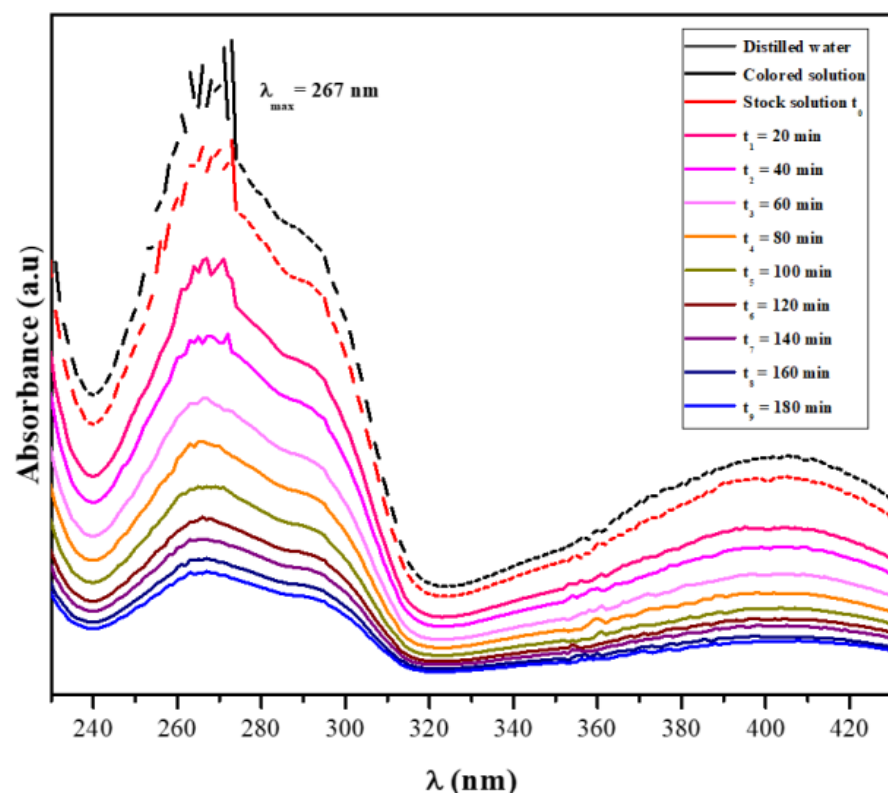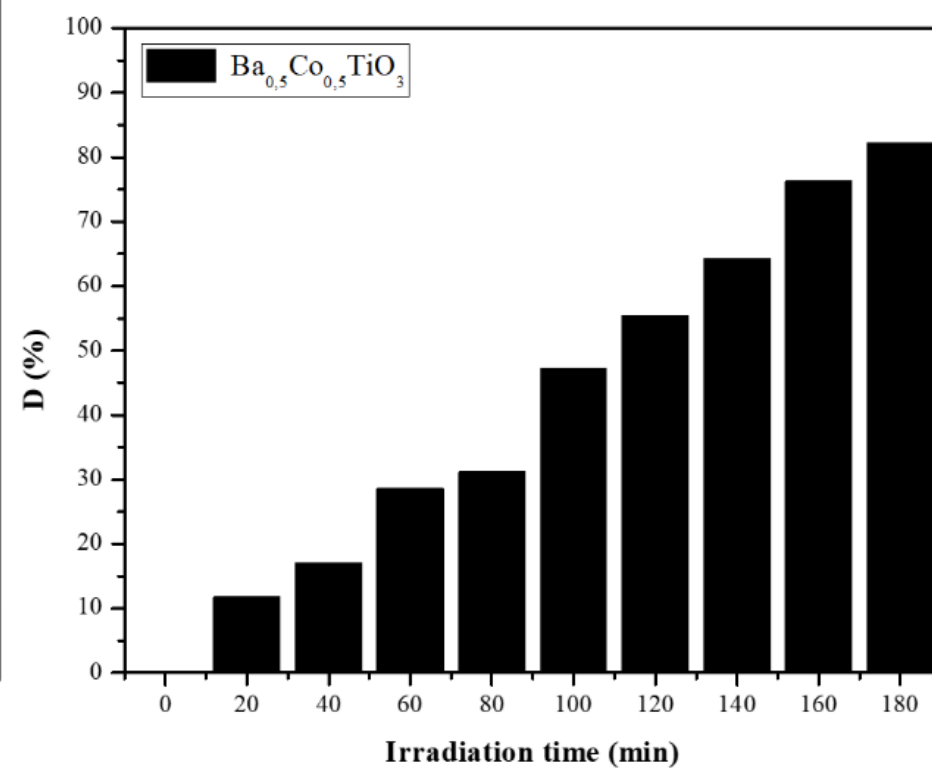

Figure S7. Continued.

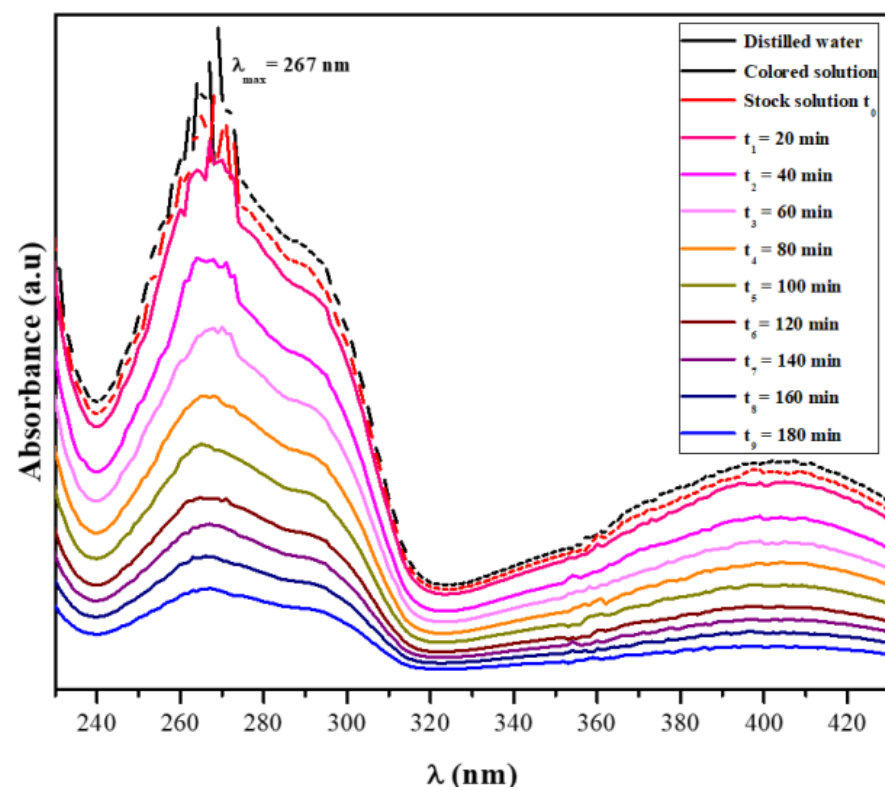

Figure S7. Continued.

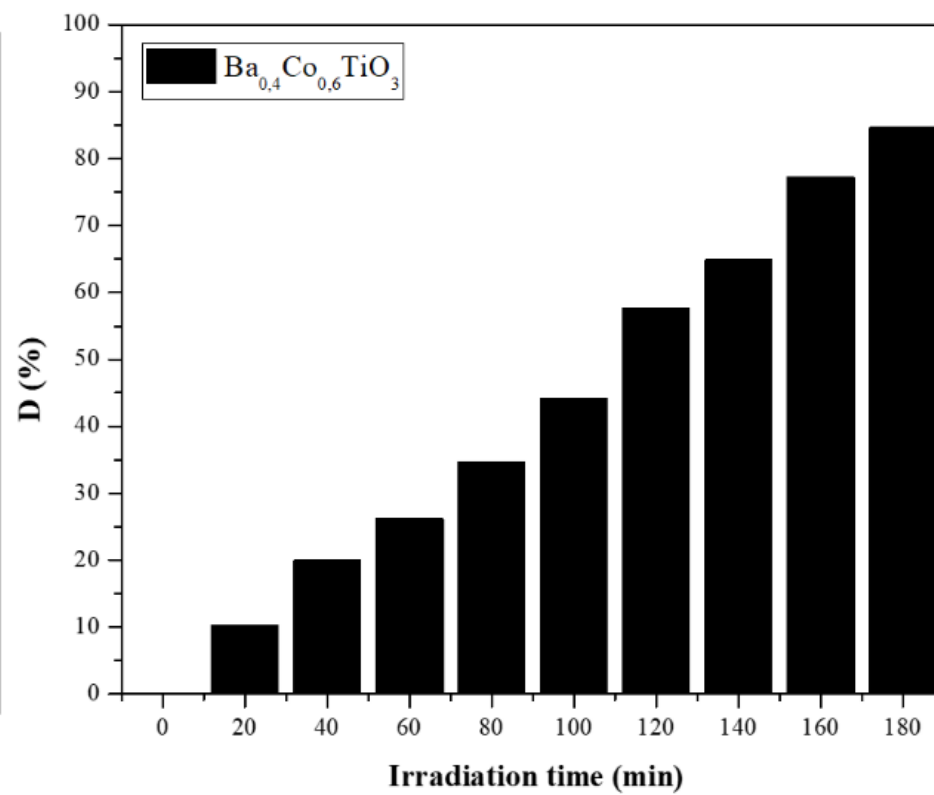

(g)

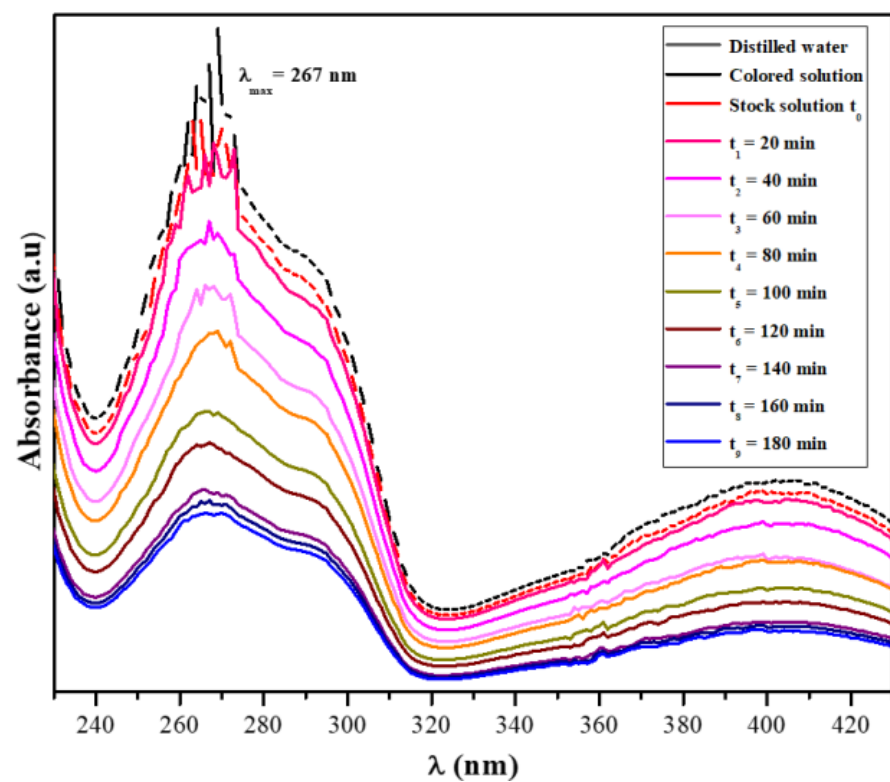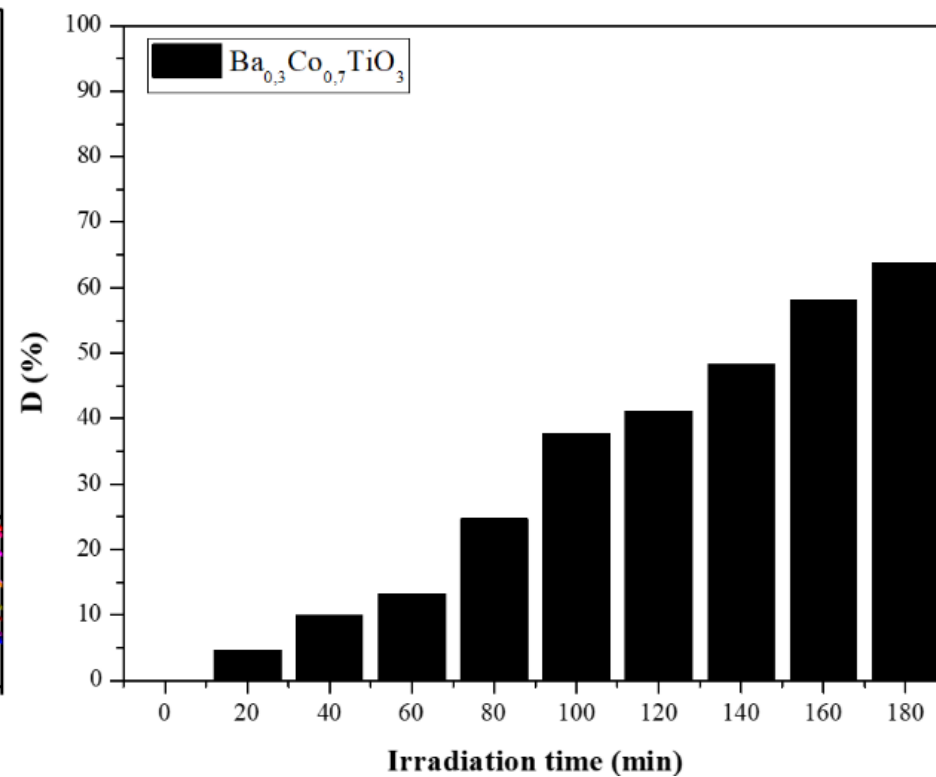

(h)

Figure S7. Continued.

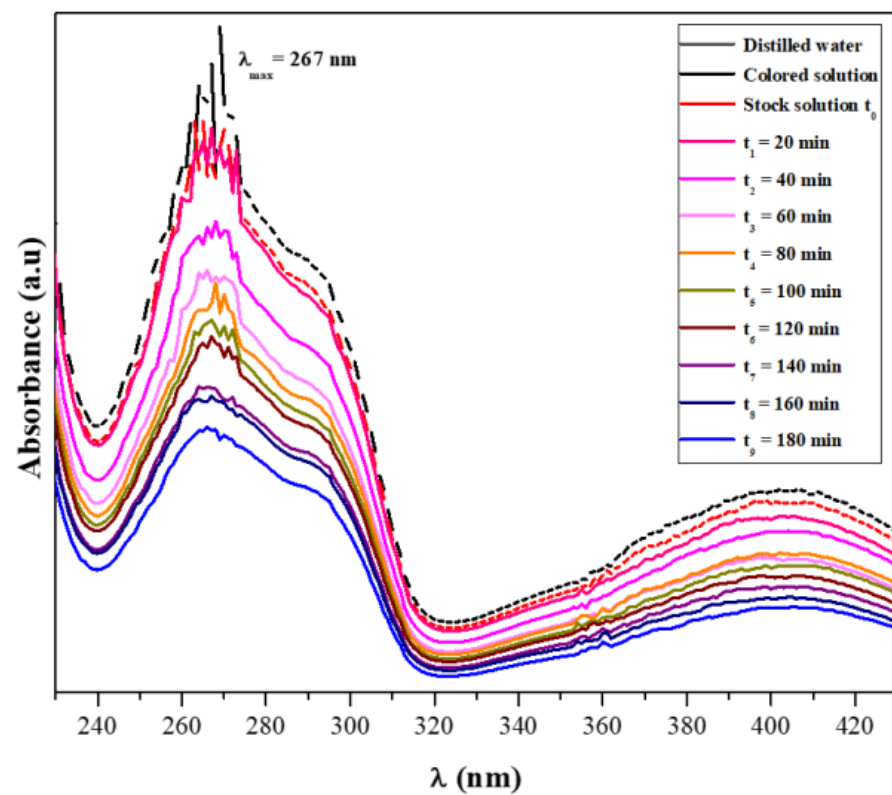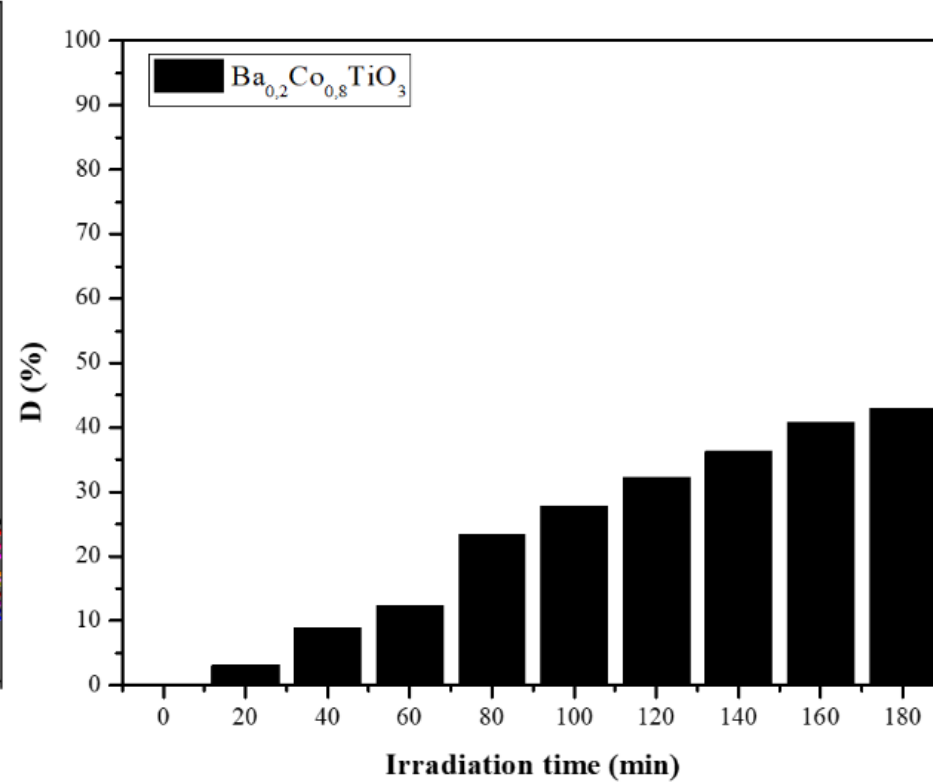

Figure S7. Continued.

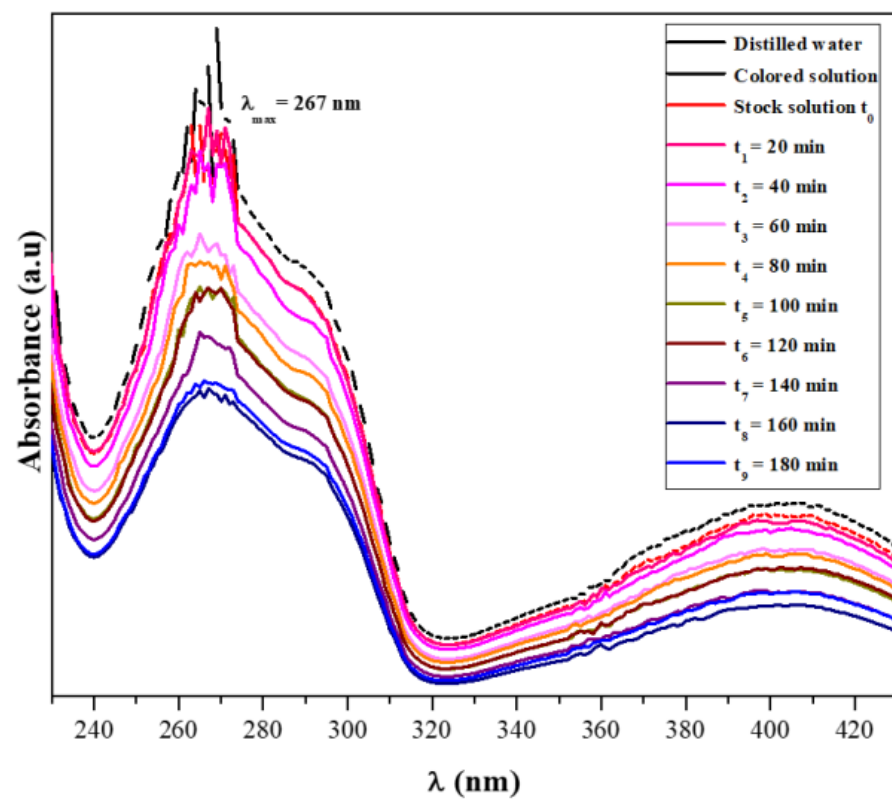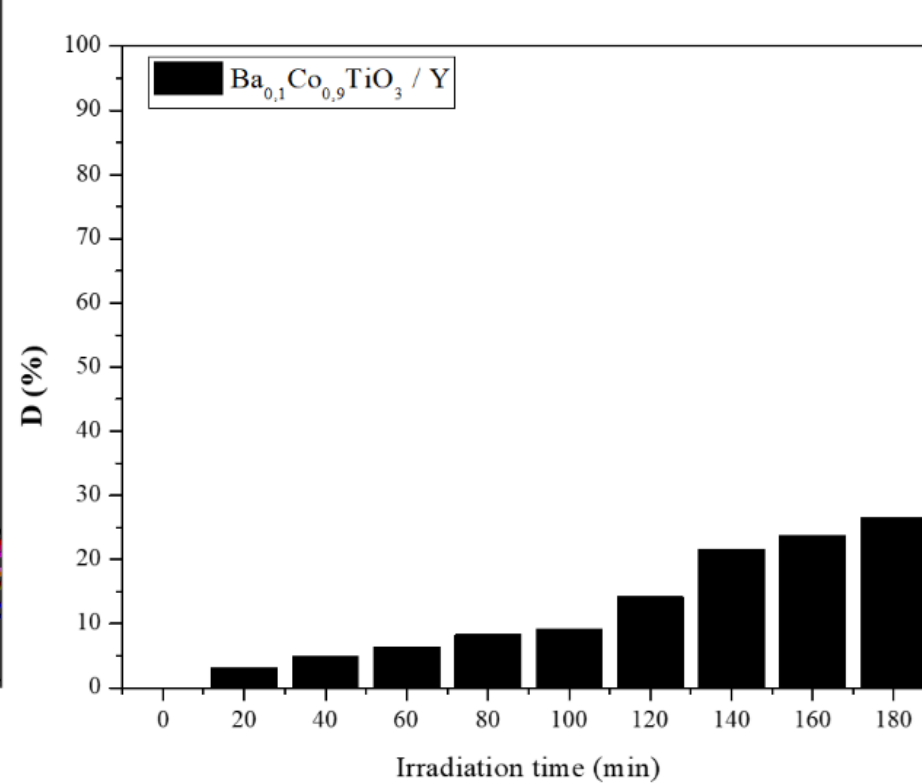

(j)

Figure S7. Continued.

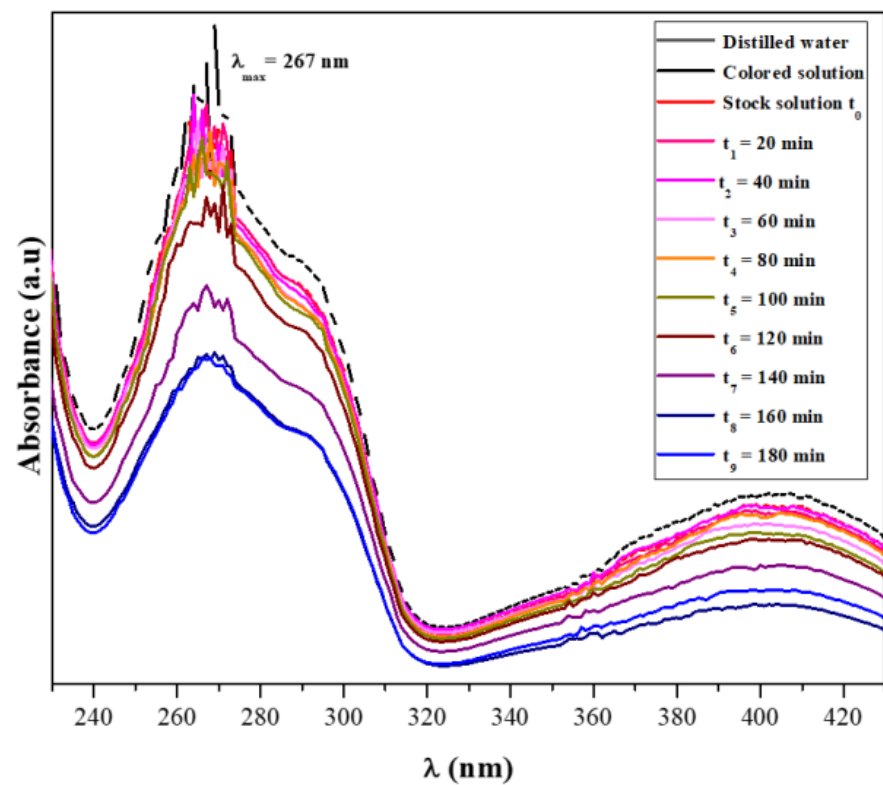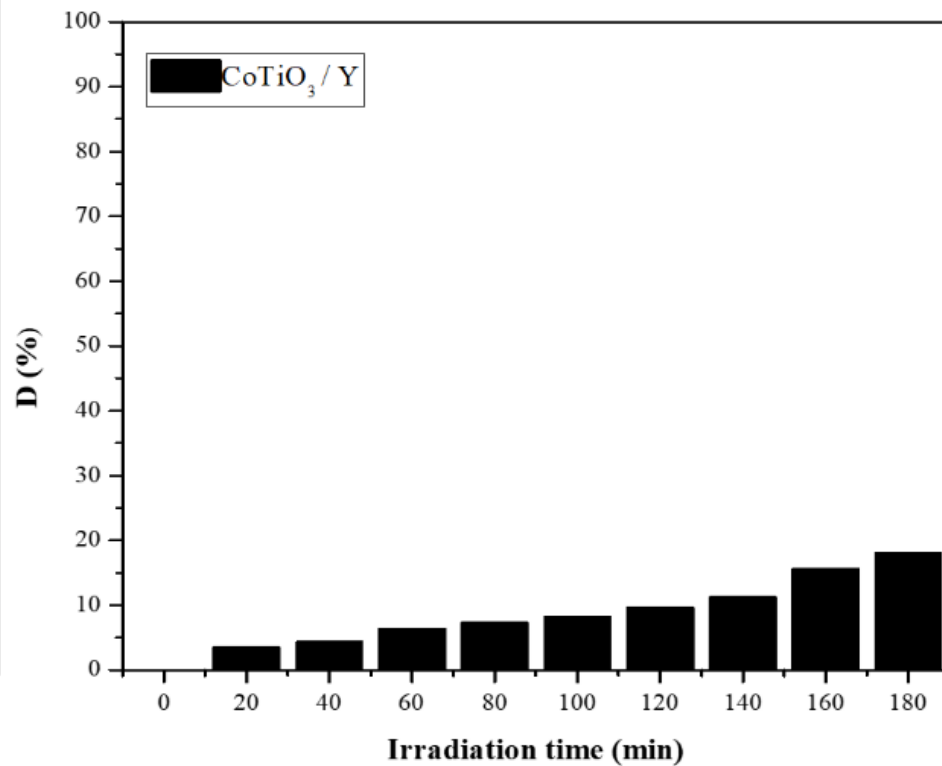

(k)

**Figure S7.** Photocatalytic degradation of CBY 3G-P by  $\text{Ba}_{1-x}\text{Co}_x\text{TiO}_3$ ,  $\{x = 0, \dots, 1\}$ : (a)  $\text{BaTiO}_3$ ; (b)  $\text{Ba}_{0.9}\text{Co}_{0.1}\text{TiO}_3$ ; (c)  $\text{Ba}_{0.8}\text{Co}_{0.2}\text{TiO}_3$ ; (d)  $\text{Ba}_{0.7}\text{Co}_{0.3}\text{TiO}_3$ ; (e)  $\text{Ba}_{0.6}\text{Co}_{0.4}\text{TiO}_3$ ; (f)  $\text{Ba}_{0.5}\text{Co}_{0.5}\text{TiO}_3$ ; (g)  $\text{Ba}_{0.4}\text{Co}_{0.6}\text{TiO}_3$ ; (h)  $\text{Ba}_{0.3}\text{Co}_{0.7}\text{TiO}_3$ ; (i)  $\text{Ba}_{0.2}\text{Co}_{0.8}\text{TiO}_3$ ; (j)  $\text{Ba}_{0.1}\text{Co}_{0.9}\text{TiO}_3$  and (k)  $\text{CoTiO}_3$  as photocatalyst under 180 min of irradiation.

## 7. Photocatalytic mechanism

(a)

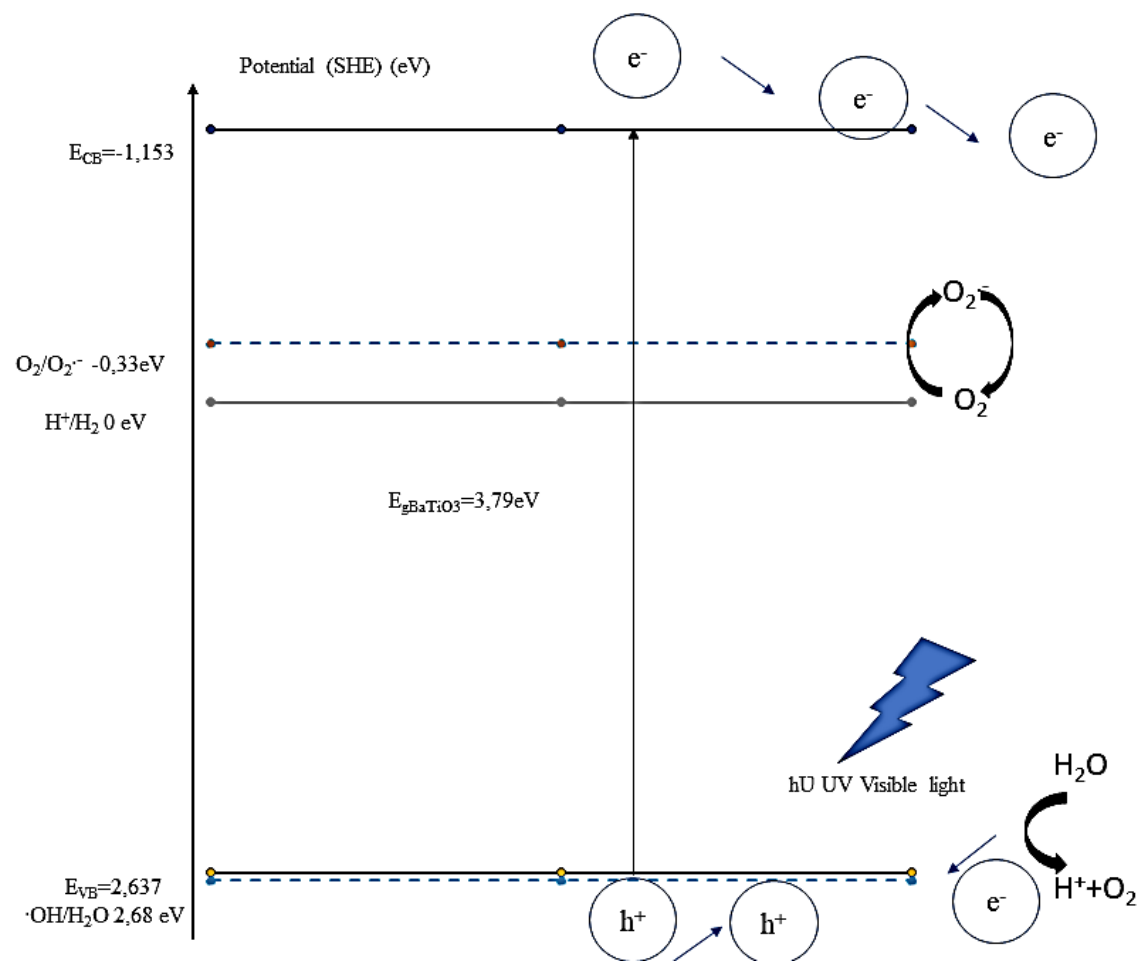

Figure S8. Continued.



(b)

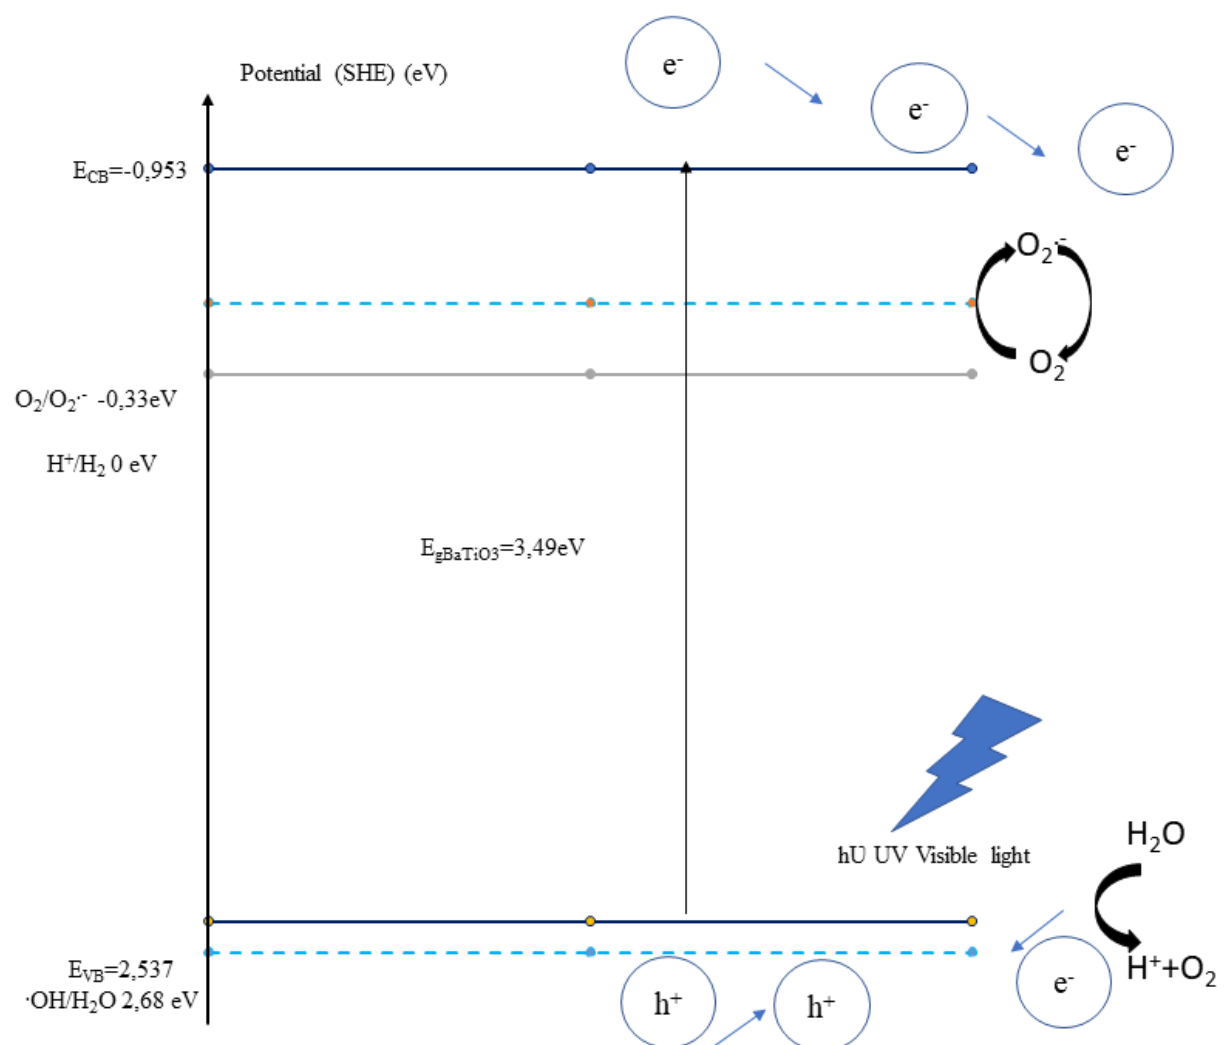

Figure S8. Continued.

(c)

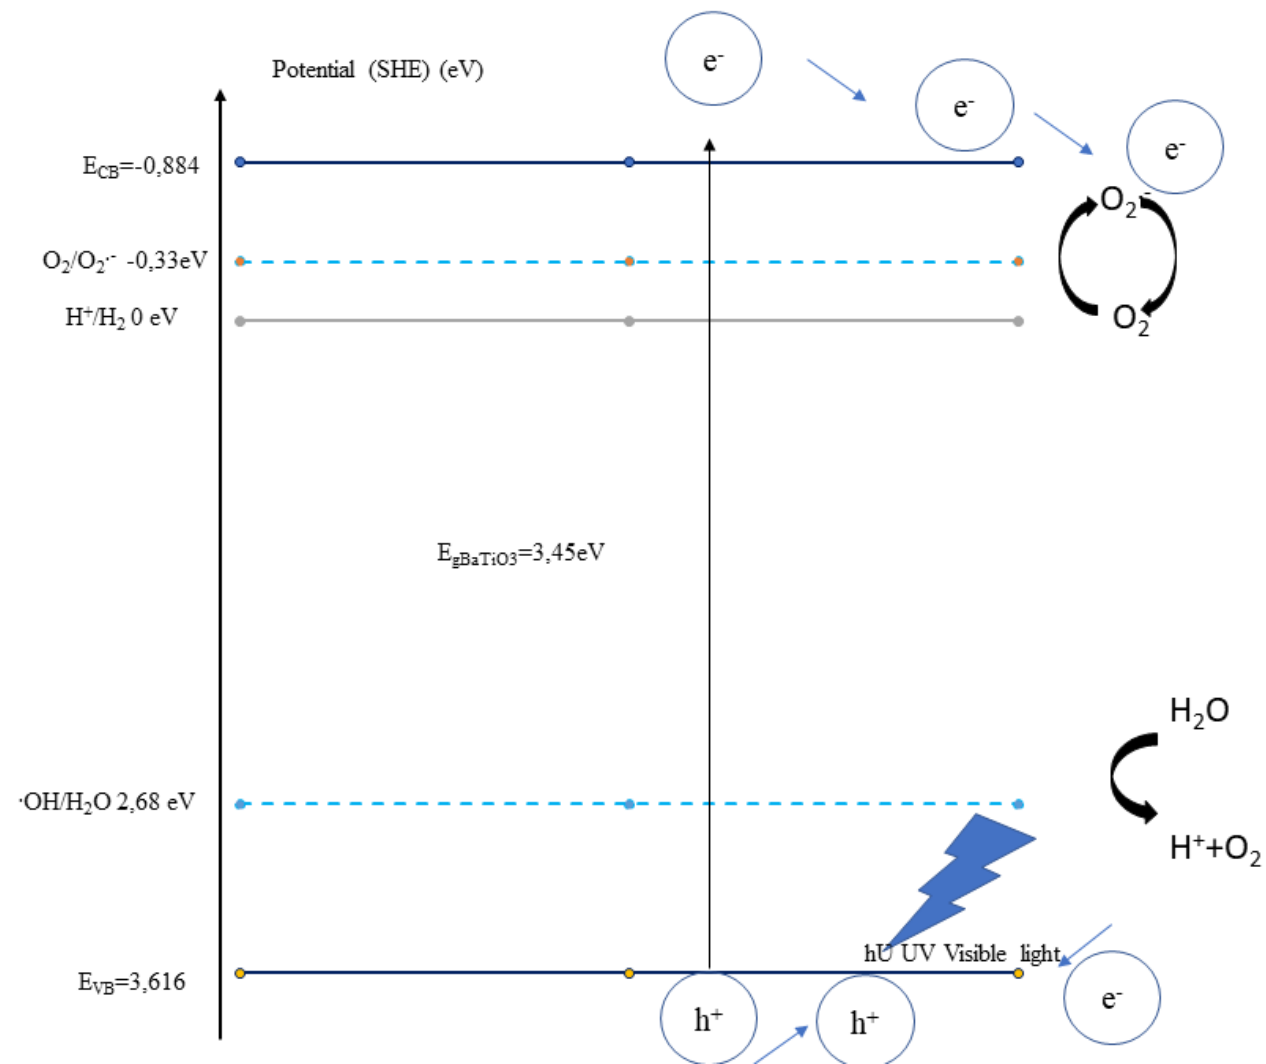

Figure S8. Continued.

(d)

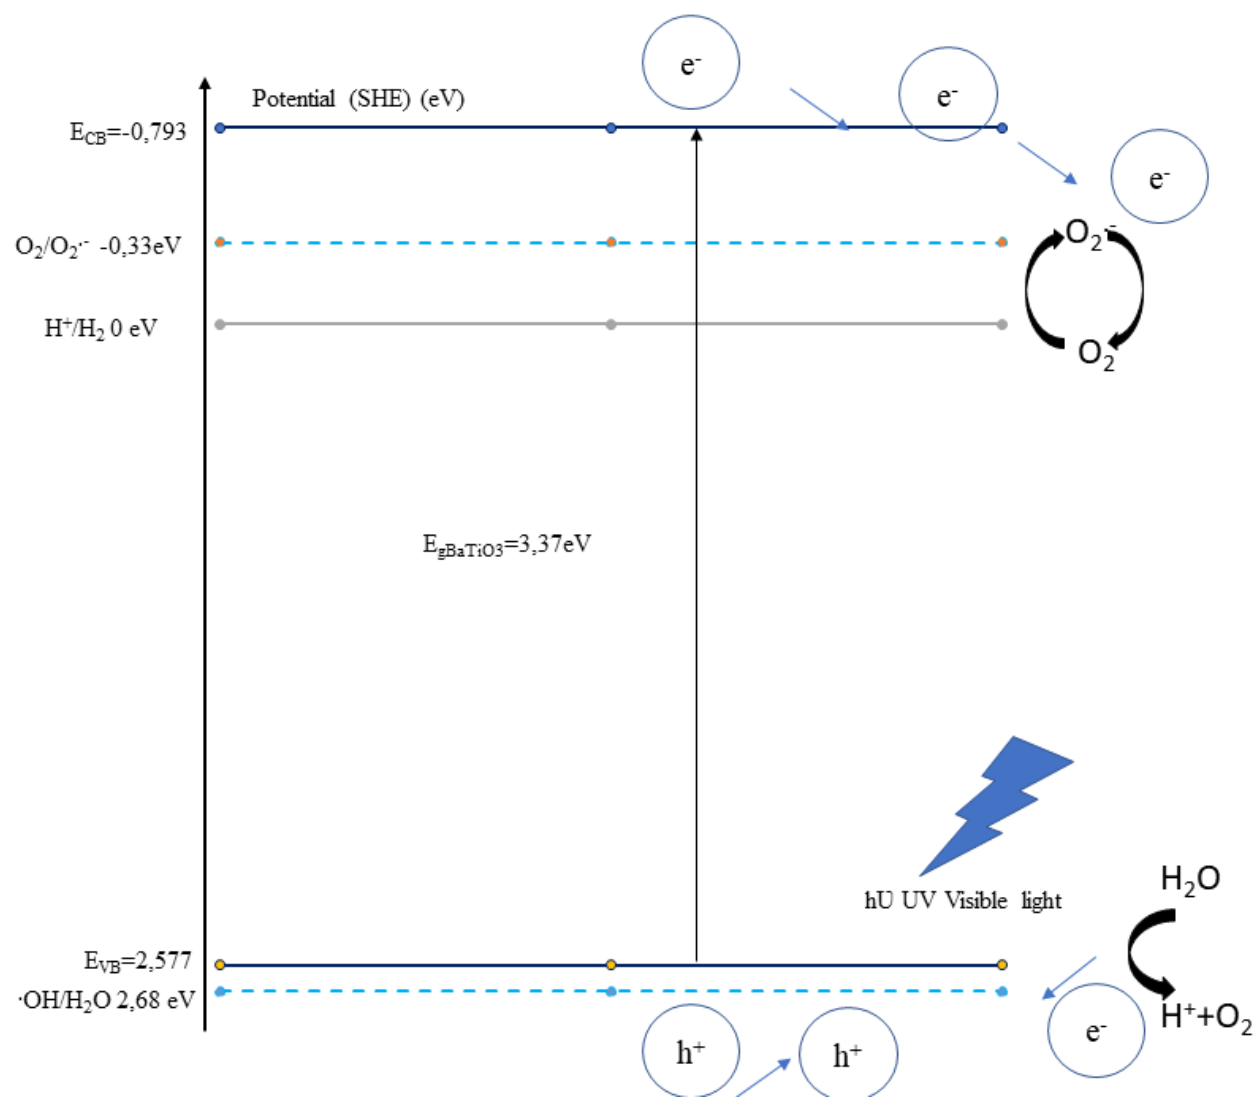

Figure S8. Continued.

(e)

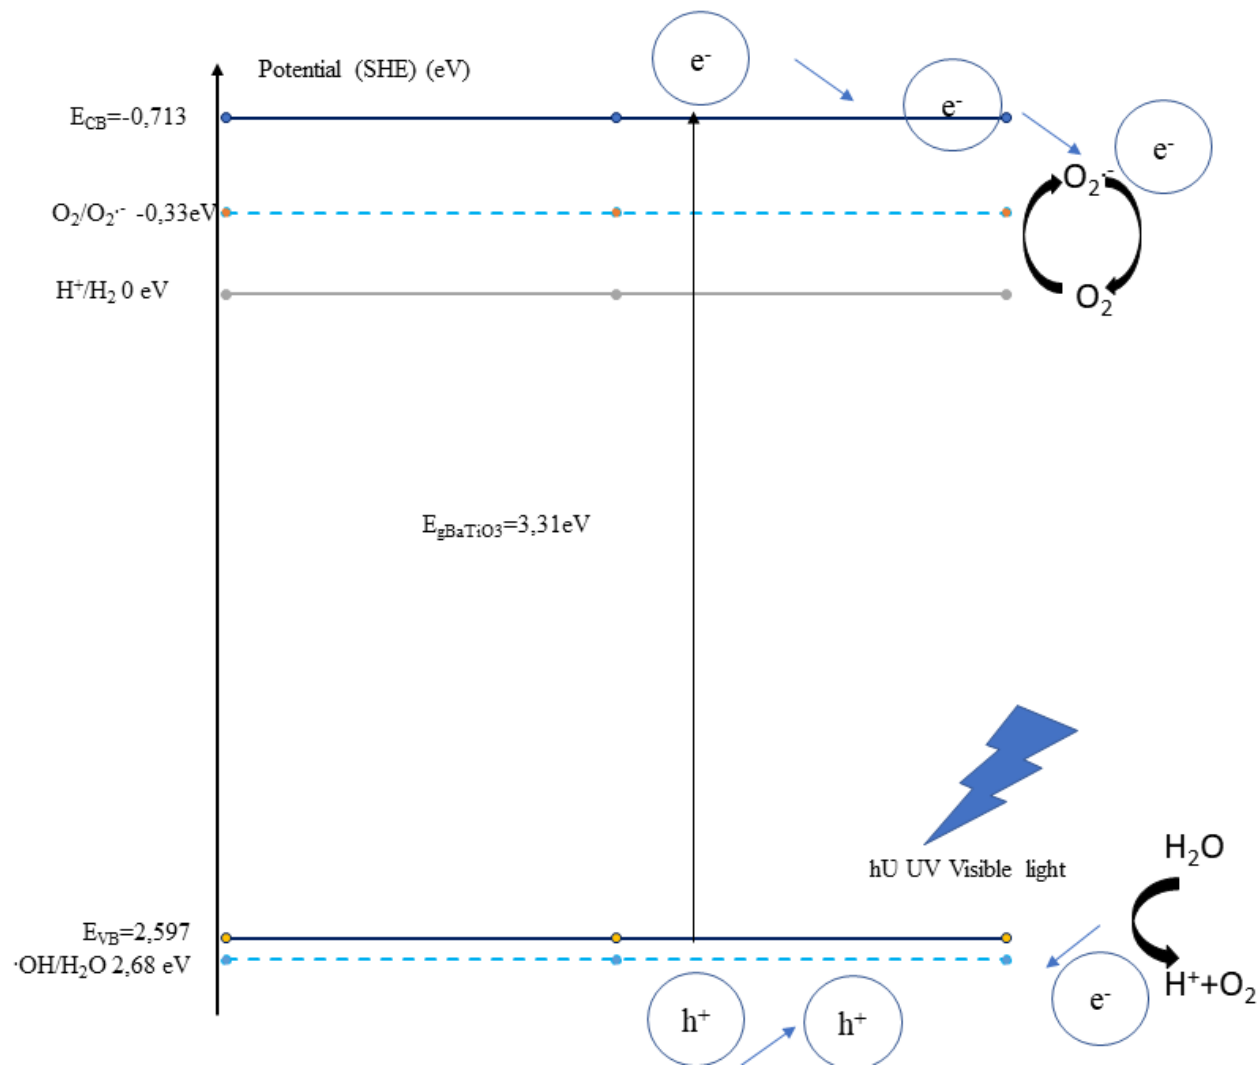

Figure S8. Continued.

(f)

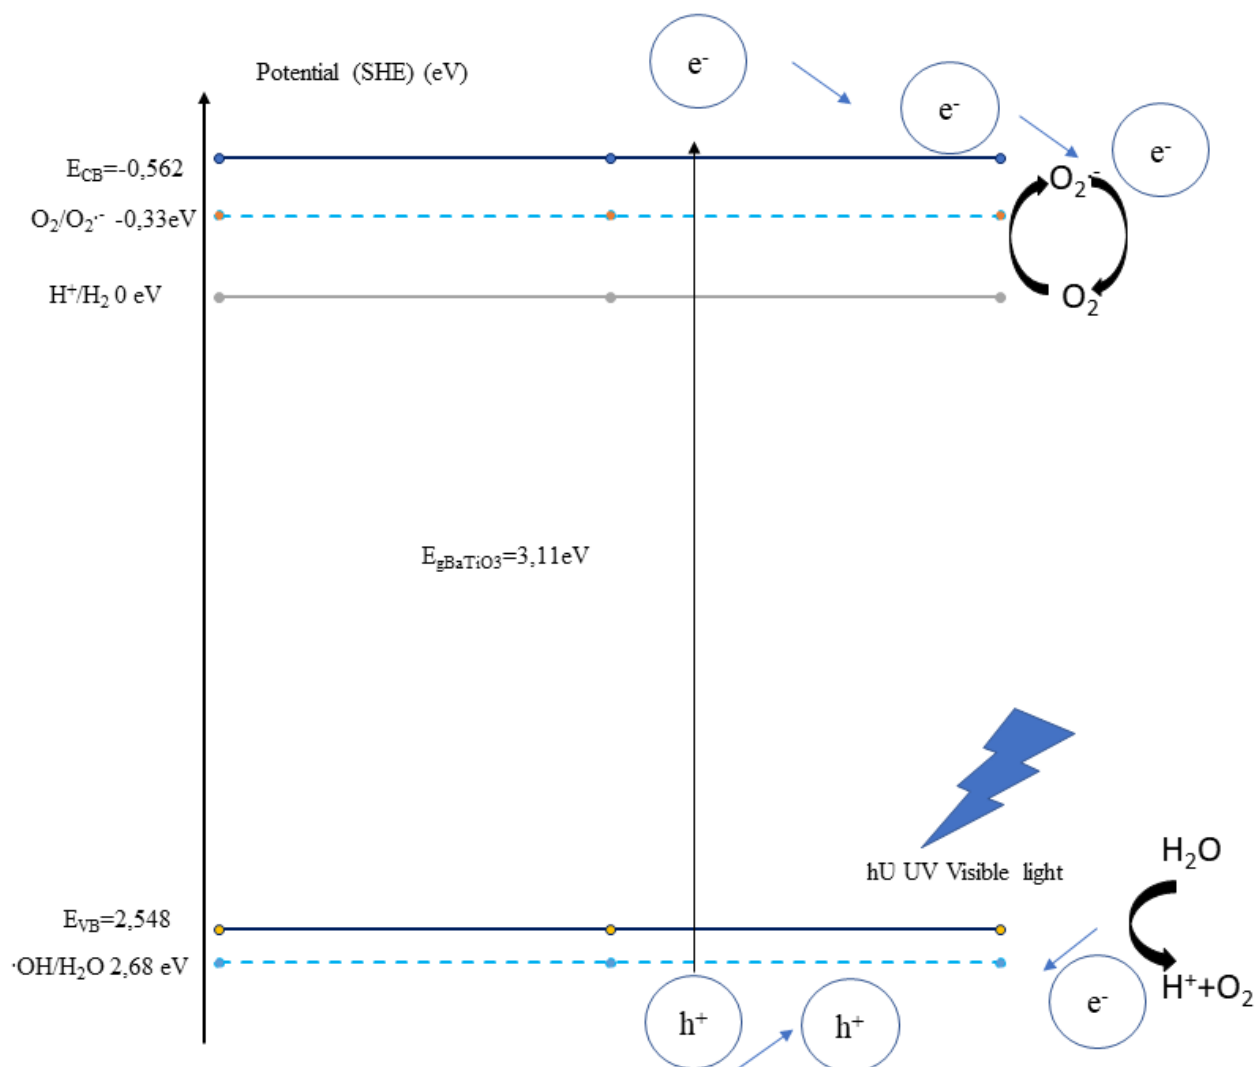

Figure S8. Continued.

(g)

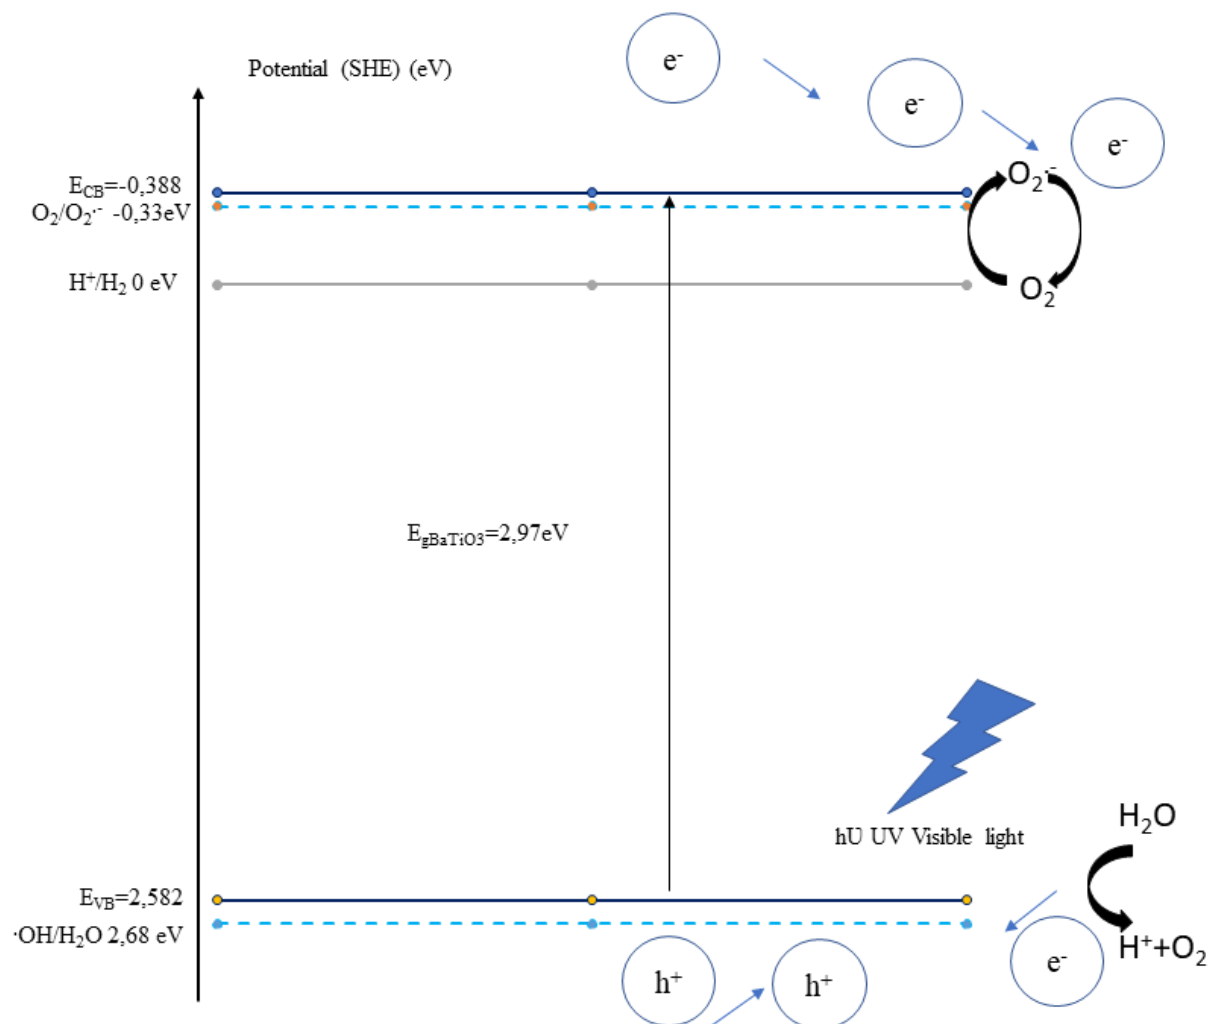

Figure S8. Continued.

(h)

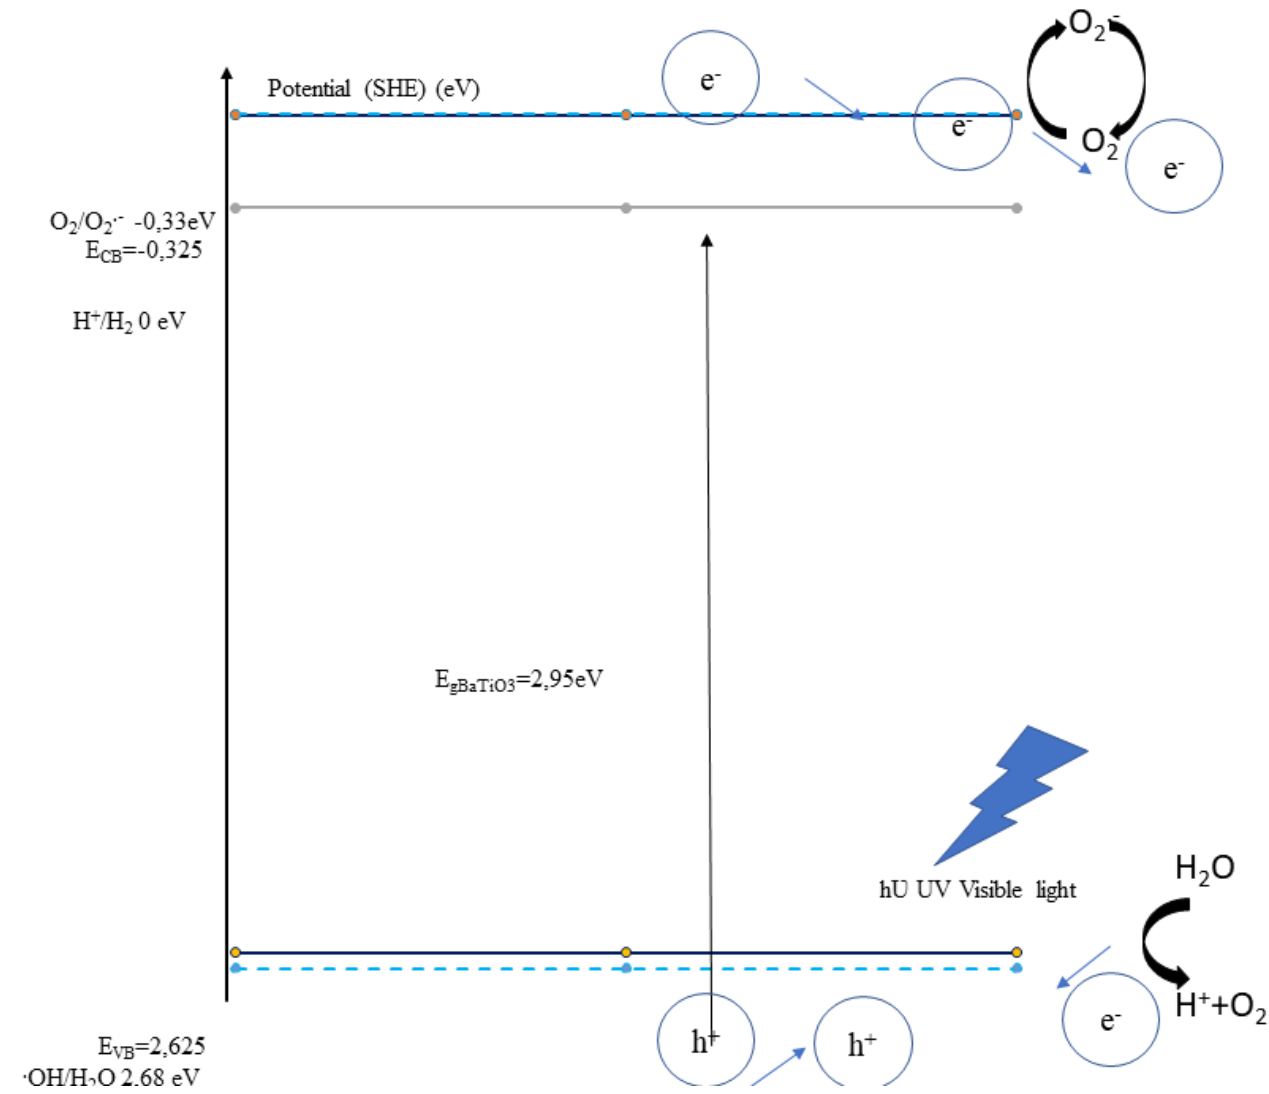

Figure S8. Continued.

(i)

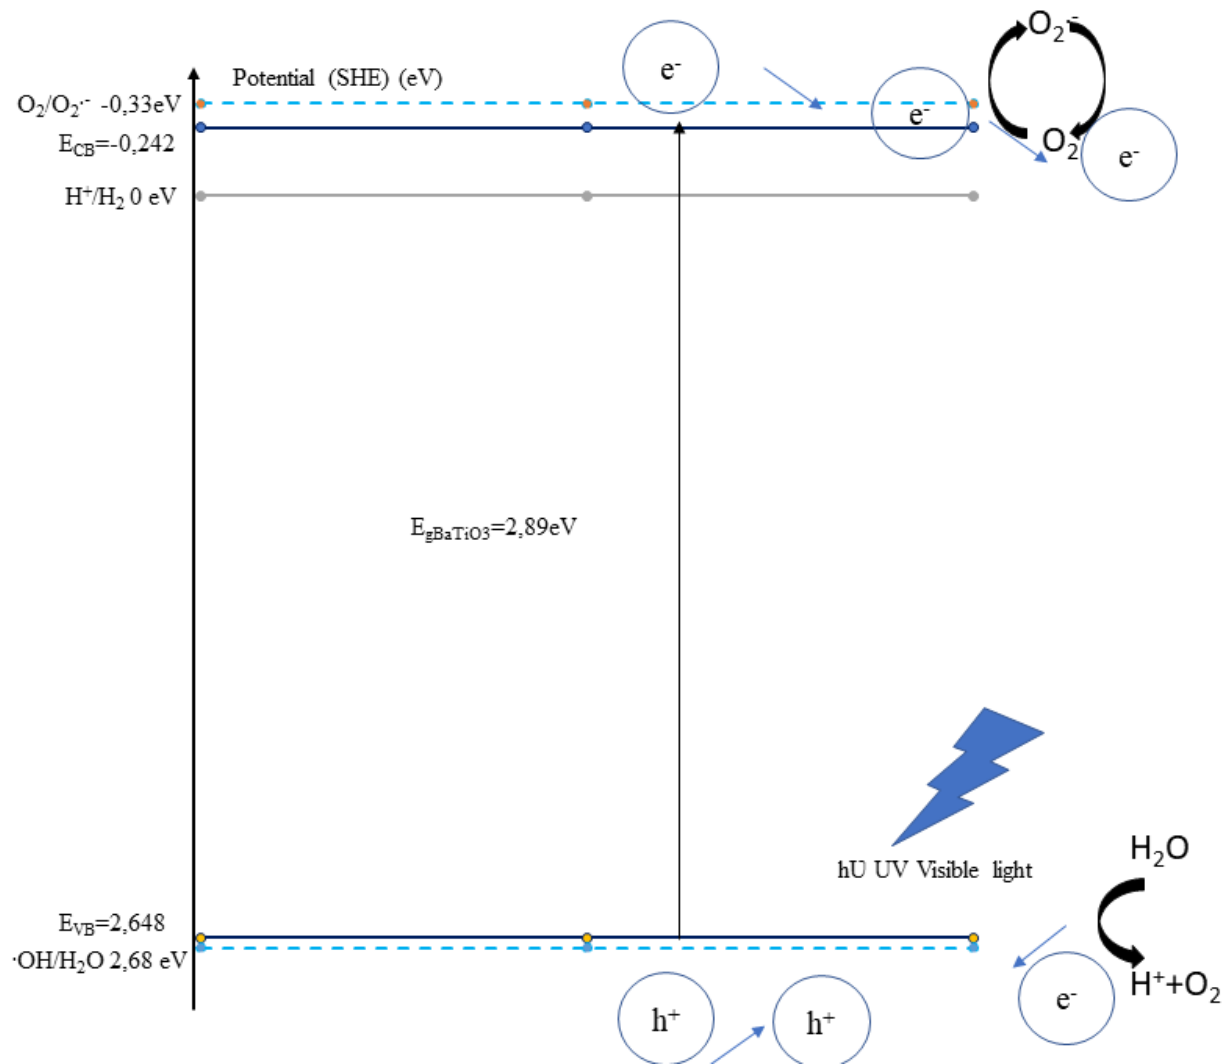

Figure S8. Continued.



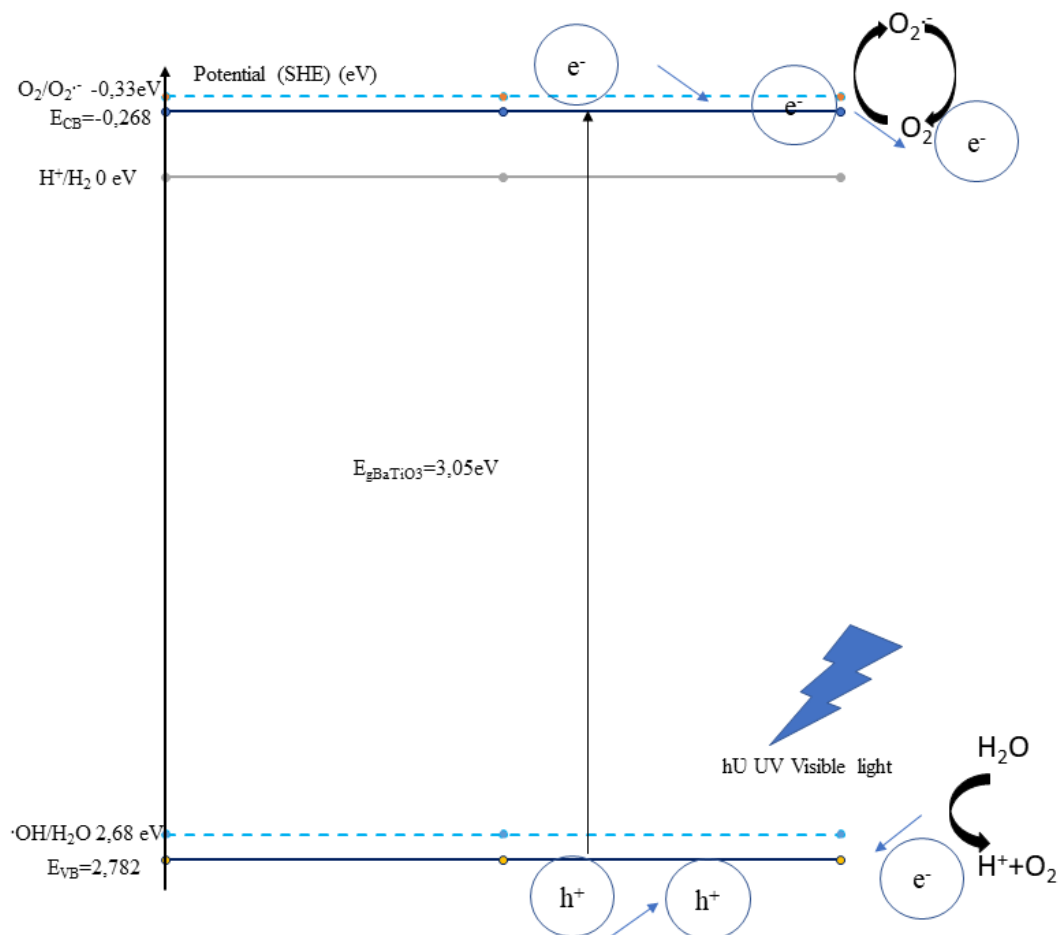

(j)

**Figure S8.** Schematic ELD of  $Ba_{1-x}Co_xTiO_3$  with respect to potential for the generation of  $(O_2^{\bullet-})$  ( $E^\circ_{(OH/H_2O)}$ ) and  $O_2^{\bullet-}$  ( $E_{O_2/O_2^{\bullet-}}$ ) radicals: (a)  $BaTiO_3$ , (b)  $Ba_{0.9}Co_{0.1}TiO_3$ ; (c)  $Ba_{0.8}Co_{0.2}TiO_3$ ; (d)  $Ba_{0.7}Co_{0.3}TiO_3$ ; (e)  $Ba_{0.6}Co_{0.4}TiO_3$ ; (f)  $Ba_{0.5}Co_{0.5}TiO_3$ ; (g)  $Ba_{0.3}Co_{0.7}TiO_3$ ; (h)  $Ba_{0.2}Co_{0.8}TiO_3$ ; (i)  $Ba_{0.1}Co_{0.9}TiO_3$  and (j)  $CoTiO_3$ .
