# Supplementary material for: Enhancement of Photocatalytic Activity and Microstructural Growth of Cobalt-Substituted Ba1−xCoxTiO3 {x = 0, …, 1} Heterostructure
Source: MDPI journal article supplement (doi:10.3390/chemengineering7030043), 2023-05-01
Supplement: s1 [file s1]

Archive with 1 entries (1 files):
- ChemEngineering-2274335-supplementary.pdf
